# Supplementary material for: Crucial role of hsa-mir-503, hsa-mir-1247, and their validation in prostate cancer
Source: Aging (Albany NY). 2023 Nov 16;15(22):12966–81. doi: 10.18632/aging.205213 (PMC10713397; doi:10.18632/aging.205213)
Supplement: Supplementary Table 1 [file aging-15-205213-s001.xlsx]

## Sheet: Supplementary Table 1
Supplementary Table 1. Detailed list of PC samples in cluster 1 and cluster 3.
sample	type
TCGA-CH-5745	Cluster1
TCGA-CH-5790	Cluster1
TCGA-H9-7775	Cluster1
TCGA-EJ-7797	Cluster1
TCGA-HC-7738	Cluster1
TCGA-EJ-5526	Cluster1
TCGA-J9-A8CM	Cluster1
TCGA-XK-AAIR	Cluster1
TCGA-ZG-A9L0	Cluster1
TCGA-J4-AATZ	Cluster1
TCGA-QU-A6IP	Cluster1
TCGA-J4-A67Q	Cluster1
TCGA-M7-A721	Cluster1
TCGA-KK-A7B1	Cluster1
TCGA-EJ-5525	Cluster1
TCGA-HC-7752	Cluster1
TCGA-HI-7168	Cluster1
TCGA-CH-5772	Cluster1
TCGA-EJ-A8FP	Cluster1
TCGA-Y6-A8TL	Cluster1
TCGA-ZG-A9L4	Cluster1
TCGA-EJ-5519	Cluster1
TCGA-HC-8216	Cluster1
TCGA-2A-AAYF	Cluster1
TCGA-CH-5738	Cluster1
TCGA-EJ-7781	Cluster1
TCGA-HC-7819	Cluster1
TCGA-ZG-A8QZ	Cluster1
TCGA-EJ-7793	Cluster1
TCGA-KK-A7B3	Cluster1
TCGA-2A-AAYU	Cluster1
TCGA-CH-5744	Cluster1
TCGA-EJ-A46E	Cluster1
TCGA-EJ-5531	Cluster1
TCGA-CH-5767	Cluster1
TCGA-HC-7821	Cluster1
TCGA-M7-A720	Cluster1
TCGA-ZG-A9NI	Cluster1
TCGA-YL-A9WJ	Cluster1
TCGA-EJ-7782	Cluster1
TCGA-HC-7737	Cluster1
TCGA-HC-A9TH	Cluster1
TCGA-HC-7742	Cluster1
TCGA-CH-5794	Cluster1
TCGA-HC-7210	Cluster1
TCGA-KC-A7FD	Cluster1
TCGA-EJ-7794	Cluster1
TCGA-XJ-A83H	Cluster1
TCGA-J4-A83J	Cluster1
TCGA-X4-A8KQ	Cluster1
TCGA-EJ-5507	Cluster1
TCGA-HC-8258	Cluster1
TCGA-EJ-A7NG	Cluster1
TCGA-EJ-5527	Cluster1
TCGA-EJ-5524	Cluster1
TCGA-EJ-7784	Cluster1
TCGA-HC-7209	Cluster1
TCGA-G9-7510	Cluster1
TCGA-YL-A8S8	Cluster1
TCGA-EJ-8472	Cluster1
TCGA-XJ-A9DK	Cluster1
TCGA-EJ-7123	Cluster1
TCGA-EJ-7330	Cluster1
TCGA-CH-5748	Cluster1
TCGA-HC-7744	Cluster1
TCGA-KK-A8I6	Cluster1
TCGA-EJ-A8FS	Cluster1
TCGA-EJ-5530	Cluster1
TCGA-CH-5769	Cluster1
TCGA-M7-A725	Cluster1
TCGA-YL-A8SO	Cluster1
TCGA-VN-A88Q	Cluster1
TCGA-ZG-A9LZ	Cluster1
TCGA-V1-A9OX	Cluster1
TCGA-QU-A6IN	Cluster1
TCGA-CH-5752	Cluster1
TCGA-EJ-A46I	Cluster1
TCGA-YL-A8HK	Cluster1
TCGA-KK-A59Z	Cluster1
TCGA-VP-A876	Cluster1
TCGA-EJ-A8FN	Cluster1
TCGA-XJ-A83F	Cluster1
TCGA-HC-A6AL	Cluster1
TCGA-4L-AA1F	Cluster1
TCGA-EJ-A8FU	Cluster1
TCGA-CH-5761	Cluster1
TCGA-YL-A8HJ	Cluster1
TCGA-QU-A6IL	Cluster1
TCGA-V1-A8MJ	Cluster1
TCGA-HC-8262	Cluster1
TCGA-J4-A83L	Cluster1
TCGA-HC-7817	Cluster1
TCGA-EJ-7321	Cluster1
TCGA-V1-A8WN	Cluster1
TCGA-YL-A8SP	Cluster1
TCGA-CH-5737	Cluster1
TCGA-KK-A6DY	Cluster1
TCGA-XK-AAJT	Cluster1
TCGA-KK-A6E0	Cluster1
TCGA-J9-A52E	Cluster1
TCGA-VP-A87H	Cluster1
TCGA-FC-A66V	Cluster1
TCGA-J9-A52B	Cluster1
TCGA-CH-5753	Cluster1
TCGA-2A-A8VT	Cluster1
TCGA-G9-6336	Cluster1
TCGA-EJ-8474	Cluster1
TCGA-J4-A83N	Cluster1
TCGA-EJ-5502	Cluster1
TCGA-HC-7230	Cluster1
TCGA-EJ-A65B	Cluster1
TCGA-EJ-8470	Cluster1
TCGA-G9-6378	Cluster1
TCGA-EJ-5542	Cluster1
TCGA-SU-A7E7	Cluster1
TCGA-EJ-A46D	Cluster1
TCGA-YL-A8SJ	Cluster1
TCGA-CH-5788	Cluster1
TCGA-J4-A83K	Cluster1
TCGA-G9-6343	Cluster1
TCGA-HC-A6AP	Cluster1
TCGA-EJ-A46G	Cluster1
TCGA-HC-7736	Cluster1
TCGA-ZG-A9LM	Cluster1
TCGA-EJ-5503	Cluster1
TCGA-J4-AAU2	Cluster1
TCGA-HC-A6AN	Cluster1
TCGA-CH-5792	Cluster1
TCGA-HC-7211	Cluster1
TCGA-HC-7818	Cluster1
TCGA-J4-A67N	Cluster1
TCGA-EJ-5506	Cluster1
TCGA-HC-8213	Cluster1
TCGA-CH-5746	Cluster1
TCGA-EJ-7327	Cluster1
TCGA-YL-A8SF	Cluster1
TCGA-CH-5762	Cluster1
TCGA-KK-A8I5	Cluster1
TCGA-G9-6367	Cluster1
TCGA-G9-6363	Cluster1
TCGA-EJ-5509	Cluster1
TCGA-VP-A87D	Cluster1
TCGA-ZG-A8QW	Cluster1
TCGA-G9-6384	Cluster1
TCGA-V1-A8MK	Cluster1
TCGA-2A-A8VL	Cluster1
TCGA-EJ-5522	Cluster1
TCGA-HC-A8D1	Cluster1
TCGA-CH-5791	Cluster1
TCGA-EJ-5496	Cluster1
TCGA-HC-7748	Cluster1
TCGA-KK-A8II	Cluster1
TCGA-J9-A52C	Cluster1
TCGA-EJ-A7NF	Cluster1
TCGA-G9-6333	Cluster1
TCGA-KK-A59Y	Cluster1
TCGA-FC-7708	Cluster1
TCGA-EJ-5512	Cluster1
TCGA-KC-A4BL	Cluster1
TCGA-2A-A8VO	Cluster1
TCGA-G9-6342	Cluster1
TCGA-EJ-5501	Cluster1
TCGA-EJ-5532	Cluster1
TCGA-XQ-A8TB	Cluster1
TCGA-ZG-A8QY	Cluster1
TCGA-J4-A6M7	Cluster1
TCGA-V1-A9ZK	Cluster1
TCGA-EJ-5511	Cluster1
TCGA-J9-A52D	Cluster1
TCGA-KK-A8IM	Cluster1
TCGA-HC-7820	Cluster1
TCGA-VP-AA1N	Cluster1
TCGA-EJ-A8FO	Cluster1
TCGA-CH-5763	Cluster1
TCGA-HC-7077	Cluster1
TCGA-YL-A9WH	Cluster1
TCGA-G9-6385	Cluster1
TCGA-YL-A8SH	Cluster1
TCGA-CH-5768	Cluster1
TCGA-H9-A6BX	Cluster1
TCGA-G9-6365	Cluster1
TCGA-G9-6364	Cluster1
TCGA-YL-A9WX	Cluster1
TCGA-J4-AATV	Cluster1
TCGA-J4-A83M	Cluster1
TCGA-EJ-7325	Cluster1
TCGA-HC-A6AO	Cluster1
TCGA-EJ-5495	Cluster1
TCGA-EJ-5521	Cluster1
TCGA-HC-7213	Cluster1
TCGA-VN-A88L	Cluster1
TCGA-CH-5766	Cluster1
TCGA-J9-A8CN	Cluster1
TCGA-CH-5739	Cluster1
TCGA-EJ-5517	Cluster1
TCGA-EJ-A65E	Cluster1
TCGA-EJ-5499	Cluster1
TCGA-G9-6332	Cluster1
TCGA-HC-A6AS	Cluster1
TCGA-KK-A6E5	Cluster1
TCGA-EJ-8469	Cluster1
TCGA-KK-A8IC	Cluster1
TCGA-G9-6354	Cluster1
TCGA-V1-A8WW	Cluster1
TCGA-CH-5789	Cluster1
TCGA-G9-7522	Cluster1
TCGA-EJ-5516	Cluster1
TCGA-EJ-5515	Cluster1
TCGA-EJ-A6RC	Cluster1
TCGA-KK-A8IF	Cluster1
TCGA-VP-A879	Cluster1
TCGA-EJ-5508	Cluster1
TCGA-J9-A8CK	Cluster1
TCGA-CH-5765	Cluster1
TCGA-J4-8200	Cluster1
TCGA-HC-8260	Cluster1
TCGA-V1-A9ZR	Cluster1
TCGA-J4-A67T	Cluster1
TCGA-G9-7525	Cluster1
TCGA-HC-7740	Cluster1
TCGA-EJ-5505	Cluster3
TCGA-ZG-A9L6	Cluster3
TCGA-HC-A8D0	Cluster3
TCGA-VN-A88I	Cluster3
TCGA-V1-A9OH	Cluster3
TCGA-EJ-7312	Cluster3
TCGA-HC-8264	Cluster3
TCGA-HC-7749	Cluster3
TCGA-EJ-7789	Cluster3
TCGA-TK-A8OK	Cluster3
TCGA-EJ-A7NN	Cluster3
TCGA-VP-A878	Cluster3
TCGA-EJ-5497	Cluster3
TCGA-YL-A8SQ	Cluster3
TCGA-EJ-5514	Cluster3
TCGA-EJ-7331	Cluster3
TCGA-EJ-A65J	Cluster3
TCGA-KK-A8IK	Cluster3
TCGA-EJ-7317	Cluster3
TCGA-EJ-8468	Cluster3
TCGA-J9-A8CP	Cluster3
TCGA-EJ-A46B	Cluster3
TCGA-EJ-5504	Cluster3
TCGA-HC-7080	Cluster3
TCGA-XK-AAJR	Cluster3
TCGA-J4-8198	Cluster3
TCGA-G9-6369	Cluster3
TCGA-KC-A4BR	Cluster3
TCGA-EJ-7792	Cluster3
TCGA-ZG-A9L5	Cluster3
TCGA-FC-A8O0	Cluster3
TCGA-V1-A9ZI	Cluster3
TCGA-V1-A9OF	Cluster3
TCGA-EJ-A7NH	Cluster3
TCGA-G9-6496	Cluster3
TCGA-HC-7232	Cluster3
TCGA-HC-A48F	Cluster3
TCGA-YL-A8SI	Cluster3
TCGA-M7-A722	Cluster3
TCGA-HC-7078	Cluster3
TCGA-CH-5741	Cluster3
TCGA-KK-A8I7	Cluster3
TCGA-EJ-A65F	Cluster3
TCGA-2A-A8W3	Cluster3
TCGA-KK-A5A1	Cluster3
TCGA-EJ-7791	Cluster3
TCGA-G9-6494	Cluster3
TCGA-V1-A9Z8	Cluster3
TCGA-KK-A8IG	Cluster3
TCGA-V1-A8MU	Cluster3
TCGA-EJ-5494	Cluster3
TCGA-CH-5771	Cluster3
TCGA-HC-7750	Cluster3
TCGA-HC-A76W	Cluster3
TCGA-XQ-A8TA	Cluster3
TCGA-FC-A5OB	Cluster3
TCGA-EJ-5510	Cluster3
TCGA-YL-A8SB	Cluster3
TCGA-VN-A88K	Cluster3
TCGA-KK-A8IJ	Cluster3
TCGA-EJ-AB20	Cluster3
TCGA-V1-A9O7	Cluster3
TCGA-V1-A9Z7	Cluster3
TCGA-KK-A59X	Cluster3
TCGA-EJ-7785	Cluster3
TCGA-VN-A88R	Cluster3
TCGA-ZG-A9L9	Cluster3
TCGA-ZG-A9LY	Cluster3
TCGA-HC-7081	Cluster3
TCGA-EJ-7125	Cluster3
TCGA-Y6-A9XI	Cluster3
TCGA-XK-AAK1	Cluster3
TCGA-EJ-7788	Cluster3
TCGA-KK-A8I9	Cluster3
TCGA-EJ-7786	Cluster3
TCGA-YL-A8HO	Cluster3
TCGA-YL-A8SR	Cluster3
TCGA-G9-7519	Cluster3
TCGA-V1-A9ZG	Cluster3
TCGA-V1-A9OA	Cluster3
TCGA-FC-7961	Cluster3
TCGA-HC-7212	Cluster3
TCGA-V1-A8MF	Cluster3
TCGA-ZG-A9ND	Cluster3
TCGA-VN-A88P	Cluster3
TCGA-EJ-7783	Cluster3
TCGA-XJ-A9DX	Cluster3
TCGA-V1-A8ML	Cluster3
TCGA-EJ-7115	Cluster3
TCGA-EJ-A65M	Cluster3
TCGA-G9-7523	Cluster3
TCGA-KK-A6E7	Cluster3
TCGA-M7-A724	Cluster3
TCGA-KC-A7FE	Cluster3
TCGA-EJ-5518	Cluster3
TCGA-FC-A6HD	Cluster3
TCGA-V1-A9Z9	Cluster3
