# Supplementary material for: Crucial role of hsa-mir-503, hsa-mir-1247, and their validation in prostate cancer
Source: Aging (Albany NY). 2023 Nov 16;15(22):12966–81. doi: 10.18632/aging.205213 (PMC10713397; doi:10.18632/aging.205213)
Supplement: Supplementary Table 2 [file aging-15-205213-s002.xlsx]

## Sheet: KEGG
Supplementary Table 2. Detailed functional enrichment results.
	ID	Description	GeneRatio	BgRatio	pvalue	p.adjust	qvalue	geneID	Count
hsa04110	hsa04110	Cell cycle	19/311	124/8096	2.16043e-07	6.35166e-05	5.43518e-05	7029/8555/7157/1026/7465/9134/898/1111/993/8556/595/4176/896/894/5000/7534/699/4087/1871	19
hsa04115	hsa04115	p53 signaling pathway	12/311	73/8096	1.86899e-05	0.00212464	0.00181808	4194/7157/1026/9134/898/1111/595/901/896/894/596/64393	12
hsa05162	hsa05162	Measles	17/311	139/8096	2.168e-05	0.00212464	0.00181808	3310/3454/7189/7157/9134/898/595/896/5295/3551/894/596/10000/6885/3558/3439/3312	17
hsa04630	hsa04630	JAK-STAT signaling pathway	18/311	162/8096	4.61242e-05	0.00339013	0.00290097	3454/3588/4352/30837/1026/595/896/5295/894/596/9655/10000/8651/2057/3558/3439/3565/3586	18
hsa05161	hsa05161	Hepatitis B	17/311	162/8096	0.00015266	0.00887064	0.0075907	332/3454/7189/7157/1026/9134/898/5295/3551/596/10000/1654/7534/6885/3439/1871/1960	17
hsa05222	hsa05222	Small cell lung cancer	12/311	92/8096	0.000191855	0.00887064	0.0075907	7189/3673/7157/1026/9134/898/595/5295/3551/596/10000/1871	12
hsa04151	hsa04151	PI3K-Akt signaling pathway	28/311	354/8096	0.000211206	0.00887064	0.0075907	3454/2783/5518/3673/7157/1026/9134/898/595/2247/7422/896/5295/3551/2253/894/3480/2260/596/10000/7534/5527/2057/3558/3439/3565/4602/1277	28
hsa05215	hsa05215	Prostate cancer	12/311	97/8096	0.000317507	0.0116684	0.00998476	7157/1026/9134/898/595/5295/3551/3480/2260/596/10000/1871	12
hsa05218	hsa05218	Melanoma	10/311	72/8096	0.000391129	0.0127769	0.0109333	7157/1026/595/2247/5295/2253/3480/2260/10000/1871	10
hsa05166	hsa05166	Human T-cell leukemia virus 1 infection	19/311	219/8096	0.000739364	0.0217373	0.0186008	115650/6688/7157/1026/9134/898/1111/595/958/896/5295/3551/894/821/10000/4087/4488/3558/1871	19
hsa05145	hsa05145	Toxoplasmosis	12/311	112/8096	0.00117703	0.0314588	0.0269197	3310/7189/3949/3588/958/3551/596/10000/8651/6885/3586/3312	12
hsa05169	hsa05169	Epstein-Barr virus infection	17/311	202/8096	0.00193365	0.0473744	0.0405388	3454/7189/7157/1026/9134/898/595/958/896/5295/3551/894/596/10000/6885/3439/1871	17

## Sheet: GO
	ONTOLOGY	ID	Description	GeneRatio	BgRatio	pvalue	p.adjust	qvalue	geneID	Count
GO:0000082	BP	GO:0000082	G1/S transition of mitotic cell cycle	27/588	287/18866	3.63165e-07	0.00119595	0.00107168	TFDP2/TM4SF5/RBBP8/MDM4/INO80/MCM8/TP53/CDKN1A/WEE1/CCNE2/CCNE1/CDC25A/CCND1/MCM7/DHFR/CCND3/CCND2/BCL2/ORC4/DDX3X/BRD7/CDK17/CACUL1/CTDSPL/CUL3/PSME3/E2F3	27
GO:0044843	BP	GO:0044843	cell cycle G1/S phase transition	28/588	310/18866	5.08159e-07	0.00119595	0.00107168	TFDP2/TM4SF5/RBBP8/MDM4/INO80/MCM8/TP53/CDKN1A/WEE1/CCNE2/CCNE1/CDC25A/CCND1/MCM7/DHFR/CCND3/CCND2/FBXW7/BCL2/ORC4/DDX3X/BRD7/CDK17/CACUL1/CTDSPL/CUL3/PSME3/E2F3	28
GO:0046639	BP	GO:0046639	negative regulation of alpha-beta T cell differentiation	7/588	25/18866	8.1245e-06	0.0127473	0.0114228	HMGB1/RC3H1/SOCS5/SOCS1/SMAD7/IL2/IL4	7
GO:0043371	BP	GO:0043371	negative regulation of CD4-positive, alpha-beta T cell differentiation	6/588	21/18866	3.25057e-05	0.0338705	0.030351	HMGB1/RC3H1/SOCS5/SMAD7/IL2/IL4	6
GO:0019886	BP	GO:0019886	antigen processing and presentation of exogenous peptide antigen via MHC class II	12/588	99/18866	5.8699e-05	0.0338705	0.030351	CTSV/TRAF6/KLC2/CLTC/CTSD/CANX/DCTN5/SEC24A/KIF23/DYNLL2/CAPZA2/AP2B1	12
GO:0006310	BP	GO:0006310	DNA recombination	23/588	299/18866	6.83733e-05	0.0338705	0.030351	YY1/RBBP8/SMC5/INO80/HMGB1/MCM8/FANCM/NONO/SLX4/TERF2/MMS22L/CHEK1/CD40/MCM7/NUCKS1/NSD2/ATAD5/KLHL15/ACTR2/RIF1/IL2/IL4/IL10	23
GO:0045581	BP	GO:0045581	negative regulation of T cell differentiation	8/588	46/18866	7.7859e-05	0.0338705	0.030351	ZC3H8/HMGB1/RC3H1/SOCS5/SOCS1/SMAD7/IL2/IL4	8
GO:0002495	BP	GO:0002495	antigen processing and presentation of peptide antigen via MHC class II	12/588	103/18866	8.67436e-05	0.0338705	0.030351	CTSV/TRAF6/KLC2/CLTC/CTSD/CANX/DCTN5/SEC24A/KIF23/DYNLL2/CAPZA2/AP2B1	12
GO:0002822	BP	GO:0002822	regulation of adaptive immune response based on somatic recombination of immune receptors built from immunoglobulin superfamily domains	15/588	153/18866	8.97809e-05	0.0338705	0.030351	TNFRSF13C/C3/TRAF6/HMGB1/RC3H1/CD40/NSD2/SOCS5/SMAD7/ATAD5/MAP3K7/RIF1/IL2/IL4/IL10	15
GO:0002504	BP	GO:0002504	antigen processing and presentation of peptide or polysaccharide antigen via MHC class II	12/588	104/18866	9.53324e-05	0.0338705	0.030351	CTSV/TRAF6/KLC2/CLTC/CTSD/CANX/DCTN5/SEC24A/KIF23/DYNLL2/CAPZA2/AP2B1	12
GO:0000724	BP	GO:0000724	double-strand break repair via homologous recombination	14/588	138/18866	0.000105962	0.0338705	0.030351	YY1/RBBP8/SMC5/INO80/MCM8/FANCM/SLX4/MMS22L/CHEK1/MCM7/NUCKS1/KLHL15/ACTR2/RIF1	14
GO:0043370	BP	GO:0043370	regulation of CD4-positive, alpha-beta T cell differentiation	8/588	48/18866	0.000106601	0.0338705	0.030351	HMGB1/RC3H1/SOCS5/SOCS1/SMAD7/IL2/IL4/MYB	8
GO:0030888	BP	GO:0030888	regulation of B cell proliferation	9/588	62/18866	0.000121346	0.0338705	0.030351	TNFRSF13C/RC3H1/CDKN1A/CD40/BCL2/ATAD5/IL2/IL4/IL10	9
GO:0000725	BP	GO:0000725	recombinational repair	14/588	140/18866	0.000123689	0.0338705	0.030351	YY1/RBBP8/SMC5/INO80/MCM8/FANCM/SLX4/MMS22L/CHEK1/MCM7/NUCKS1/KLHL15/ACTR2/RIF1	14
GO:0045191	BP	GO:0045191	regulation of isotype switching	7/588	37/18866	0.00012577	0.0338705	0.030351	CD40/NSD2/ATAD5/RIF1/IL2/IL4/IL10	7
GO:0045623	BP	GO:0045623	negative regulation of T-helper cell differentiation	5/588	17/18866	0.000131042	0.0338705	0.030351	RC3H1/SOCS5/SMAD7/IL2/IL4	5
GO:1901987	BP	GO:1901987	regulation of cell cycle phase transition	31/588	486/18866	0.000142313	0.0338705	0.030351	TFDP2/TM4SF5/MDM4/BRSK1/PSMB2/CDC14B/INO80/PBX1/PPP2R1A/HAUS3/TP53/CDKN1A/WEE1/CHEK1/CDC25A/ANLN/CDC14A/CCND1/CCND3/CCND2/TAOK1/FBXW7/BCL2/DDX3X/ATAD5/PSMG2/BUB1/BRD7/CTDSPL/CUL3/PSME3	31
GO:0031647	BP	GO:0031647	regulation of protein stability	22/588	296/18866	0.000160518	0.0338705	0.030351	MDM4/DVL3/MCM8/PLPP3/PDCL3/TP53/CDKN1A/RPL23/B4GALT5/CTSA/PIK3R1/FBXW7/BCL2/NAPG/SMAD7/CDC37L1/RTN4/RNF149/CREBL2/CUL3/HSPA8/SEC16A	22
GO:1902893	BP	GO:1902893	regulation of pri-miRNA transcription by RNA polymerase II	8/588	51/18866	0.000165726	0.0338705	0.030351	SOX9/YY1/SPI1/BMPR1A/TP53/FGF2/TEAD1/IL10	8
GO:0048304	BP	GO:0048304	positive regulation of isotype switching to IgG isotypes	4/588	10/18866	0.000168857	0.0338705	0.030351	CD40/ATAD5/IL2/IL4	4
GO:2000320	BP	GO:2000320	negative regulation of T-helper 17 cell differentiation	4/588	10/18866	0.000168857	0.0338705	0.030351	RC3H1/SMAD7/IL2/IL4	4
GO:1901990	BP	GO:1901990	regulation of mitotic cell cycle phase transition	29/588	448/18866	0.000180651	0.0338705	0.030351	TFDP2/TM4SF5/MDM4/BRSK1/PSMB2/CDC14B/INO80/PBX1/PPP2R1A/HAUS3/TP53/CDKN1A/WEE1/CDC25A/ANLN/CDC14A/CCND1/CCND3/CCND2/TAOK1/BCL2/DDX3X/ATAD5/PSMG2/BUB1/BRD7/CTDSPL/CUL3/PSME3	29
GO:0045830	BP	GO:0045830	positive regulation of isotype switching	6/588	28/18866	0.000187416	0.0338705	0.030351	CD40/NSD2/ATAD5/RIF1/IL2/IL4	6
GO:0072132	BP	GO:0072132	mesenchyme morphogenesis	8/588	52/18866	0.000190582	0.0338705	0.030351	SOX9/MDM4/BMPR1A/FGF8/FGFR1/TMEM100/SMAD2/MSX2	8
GO:0002714	BP	GO:0002714	positive regulation of B cell mediated immunity	7/588	40/18866	0.000210055	0.0338705	0.030351	C3/CD40/NSD2/ATAD5/RIF1/IL2/IL4	7
GO:0002891	BP	GO:0002891	positive regulation of immunoglobulin mediated immune response	7/588	40/18866	0.000210055	0.0338705	0.030351	C3/CD40/NSD2/ATAD5/RIF1/IL2/IL4	7
GO:0046636	BP	GO:0046636	negative regulation of alpha-beta T cell activation	7/588	40/18866	0.000210055	0.0338705	0.030351	HMGB1/RC3H1/SOCS5/SOCS1/SMAD7/IL2/IL4	7
GO:0051052	BP	GO:0051052	regulation of DNA metabolic process	25/588	365/18866	0.000212244	0.0338705	0.030351	NMNAT1/DTX3L/SPI1/SPIRE2/HMGB1/ZNF91/SLX4/TERF2/TIGAR/USP1/TP53/CDKN1A/CHEK1/CD40/FGF2/NUCKS1/NSD2/ATAD5/KLHL15/ACTR2/RIF1/HNRNPA1/IL2/IL4/IL10	25
GO:0061614	BP	GO:0061614	pri-miRNA transcription by RNA polymerase II	8/588	53/18866	0.000218419	0.0338705	0.030351	SOX9/YY1/SPI1/BMPR1A/TP53/FGF2/TEAD1/IL10	8
GO:0006302	BP	GO:0006302	double-strand break repair	20/588	262/18866	0.00022147	0.0338705	0.030351	DTX3L/YY1/RBBP8/SMC5/SPIRE2/INO80/MCM8/FANCM/SLX4/ESCO2/MMS22L/TP53/CHEK1/MCM7/NUCKS1/DCLRE1A/NSD2/KLHL15/ACTR2/RIF1	20
GO:0048285	BP	GO:0048285	organelle fission	30/588	476/18866	0.000223069	0.0338705	0.030351	BIRC5/HASPIN/DHODH/SMC5/FANCA/CDC14B/SPIRE2/INO80/DSN1/FANCM/PPP2R1A/SLX4/CHMP1B/KNSTRN/SGO1/MIEF1/CCNE2/CCNE1/CHEK1/ANLN/CDC14A/FGF8/DDHD2/KIF23/PSMG2/BUB1/ACTR2/CYP26B1/CUL3/MSX2	30
GO:0030890	BP	GO:0030890	positive regulation of B cell proliferation	7/588	41/18866	0.000246571	0.0350847	0.031439	TNFRSF13C/CDKN1A/CD40/BCL2/ATAD5/IL2/IL4	7
GO:0002819	BP	GO:0002819	regulation of adaptive immune response	15/588	168/18866	0.000254209	0.0350847	0.031439	TNFRSF13C/C3/TRAF6/HMGB1/RC3H1/CD40/NSD2/SOCS5/SMAD7/ATAD5/MAP3K7/RIF1/IL2/IL4/IL10	15
GO:2000317	BP	GO:2000317	negative regulation of T-helper 17 type immune response	4/588	11/18866	0.000258815	0.0350847	0.031439	RC3H1/SMAD7/IL2/IL4	4
GO:0050821	BP	GO:0050821	protein stabilization	16/588	187/18866	0.00026088	0.0350847	0.031439	MDM4/DVL3/MCM8/PLPP3/PDCL3/TP53/CDKN1A/RPL23/PIK3R1/FBXW7/NAPG/SMAD7/CDC37L1/RTN4/CREBL2/SEC16A	16
GO:0045620	BP	GO:0045620	negative regulation of lymphocyte differentiation	8/588	55/18866	0.000284117	0.0371482	0.0332882	ZC3H8/HMGB1/RC3H1/SOCS5/SOCS1/SMAD7/IL2/IL4	8
GO:0002712	BP	GO:0002712	regulation of B cell mediated immunity	8/588	56/18866	0.000322554	0.0398123	0.0356754	C3/CD40/NSD2/ATAD5/RIF1/IL2/IL4/IL10	8
GO:0002889	BP	GO:0002889	regulation of immunoglobulin mediated immune response	8/588	56/18866	0.000322554	0.0398123	0.0356754	C3/CD40/NSD2/ATAD5/RIF1/IL2/IL4/IL10	8
GO:0000079	BP	GO:0000079	regulation of cyclin-dependent protein serine/threonine kinase activity	11/588	102/18866	0.000336207	0.0398123	0.0356754	CDKN1A/CCNF/CCNE2/CCNE1/CDC25A/CCND1/CCNG2/HEXIM1/CCND3/CCND2/CCNT1	11
GO:2000515	BP	GO:2000515	negative regulation of CD4-positive, alpha-beta T cell activation	6/588	31/18866	0.000338325	0.0398123	0.0356754	HMGB1/RC3H1/SOCS5/SMAD7/IL2/IL4	6
GO:0007059	BP	GO:0007059	chromosome segregation	23/588	334/18866	0.000347799	0.039929	0.03578	BIRC5/HASPIN/SMC5/INO80/DSN1/HJURP/FANCM/PPP2R1A/SLX4/CHMP1B/ESCO2/KNSTRN/SGO1/CCNE2/CCNE1/FBXW7/TLK1/DDX3X/KIF23/PSMG2/BUB1/ACTR2/CUL3	23
GO:0048002	BP	GO:0048002	antigen processing and presentation of peptide antigen	16/588	194/18866	0.000394199	0.0438268	0.0392727	CTSV/TRAF6/PSMB2/ERAP2/KLC2/CLTC/CTSD/IKBKB/CANX/DCTN5/SEC24A/KIF23/DYNLL2/CAPZA2/PSME3/AP2B1	16
GO:0002824	BP	GO:0002824	positive regulation of adaptive immune response based on somatic recombination of immune receptors built from immunoglobulin superfamily domains	11/588	105/18866	0.000432388	0.0438268	0.0392727	TNFRSF13C/C3/TRAF6/CD40/NSD2/SOCS5/ATAD5/MAP3K7/RIF1/IL2/IL4	11
GO:1902106	BP	GO:1902106	negative regulation of leukocyte differentiation	11/588	105/18866	0.000432388	0.0438268	0.0392727	NME2/ZC3H8/HMGB1/RC3H1/PIK3R1/FBXW7/SOCS5/SOCS1/SMAD7/IL2/IL4	11
GO:0002478	BP	GO:0002478	antigen processing and presentation of exogenous peptide antigen	15/588	177/18866	0.000445265	0.0438268	0.0392727	CTSV/TRAF6/PSMB2/KLC2/CLTC/CTSD/IKBKB/CANX/DCTN5/SEC24A/KIF23/DYNLL2/CAPZA2/PSME3/AP2B1	15
GO:0000280	BP	GO:0000280	nuclear division	27/588	428/18866	0.000446773	0.0438268	0.0392727	BIRC5/HASPIN/SMC5/FANCA/CDC14B/SPIRE2/INO80/DSN1/FANCM/PPP2R1A/SLX4/CHMP1B/KNSTRN/SGO1/CCNE2/CCNE1/CHEK1/ANLN/CDC14A/FGF8/KIF23/PSMG2/BUB1/ACTR2/CYP26B1/CUL3/MSX2	27
GO:0042771	BP	GO:0042771	intrinsic apoptotic signaling pathway in response to DNA damage by p53 class mediator	7/588	45/18866	0.000446927	0.0438268	0.0392727	PHLDA3/TP53/CDKN1A/HNRNPK/BCL2/ATAD5/BCL2L12	7
GO:0045911	BP	GO:0045911	positive regulation of DNA recombination	7/588	45/18866	0.000446927	0.0438268	0.0392727	CD40/NSD2/ATAD5/ACTR2/RIF1/IL2/IL4	7
GO:1904029	BP	GO:1904029	regulation of cyclin-dependent protein kinase activity	11/588	106/18866	0.000469171	0.0450691	0.040386	CDKN1A/CCNF/CCNE2/CCNE1/CDC25A/CCND1/CCNG2/HEXIM1/CCND3/CCND2/CCNT1	11
GO:0006650	BP	GO:0006650	glycerophospholipid metabolic process	23/588	343/18866	0.000504721	0.0469348	0.0420578	MTMR10/LIPC/LDLR/BPNT1/GPAT4/PIGW/SOCS7/ABHD12/LIPH/LPIN3/FGF2/SBF1/PIK3R4/PIK3R1/PI4K2B/DDHD2/OCRL/SOCS5/PNPLA6/SOCS1/PISD/PLEKHA1/MTMR3	23
GO:0000018	BP	GO:0000018	regulation of DNA recombination	11/588	107/18866	0.000508535	0.0469348	0.0420578	TERF2/CHEK1/CD40/NSD2/ATAD5/KLHL15/ACTR2/RIF1/IL2/IL4/IL10	11
GO:0048302	BP	GO:0048302	regulation of isotype switching to IgG isotypes	4/588	13/18866	0.000533541	0.0482957	0.0432773	CD40/ATAD5/IL2/IL4	4
GO:0090068	BP	GO:0090068	positive regulation of cell cycle process	21/588	302/18866	0.000545769	0.0484705	0.0434339	TFDP2/MDM4/SMC5/CDC14B/INO80/PBX1/TP53/CDKN1A/CDC25A/CDC14A/CCND1/RPL23/CCND3/FGF8/CCND2/FGFR1/DDX3X/KIF23/ATAD5/CUL3/MSX2	21
GO:0061695	CC	GO:0061695	transferase complex, transferring phosphorus-containing groups	25/608	253/19559	3.76879e-07	0.000144602	0.000135894	TAF8/CRCP/PRPS1/SOCS7/TP53/CDKN1A/CCNF/CCNE2/CCNE1/CCND1/CCNG2/CDK12/PIK3R4/CCND3/PIK3R1/IKBKB/CCND2/IGF1R/SOCS5/PRKAR2A/SOCS1/PHKA1/CCNT1/MAP3K7/NRBF2	25
GO:0000307	CC	GO:0000307	cyclin-dependent protein kinase holoenzyme complex	10/608	43/19559	5.94409e-07	0.000144602	0.000135894	CDKN1A/CCNF/CCNE2/CCNE1/CCND1/CCNG2/CDK12/CCND3/CCND2/CCNT1	10
GO:1902911	CC	GO:1902911	protein kinase complex	15/608	104/19559	7.62399e-07	0.000144602	0.000135894	CDKN1A/CCNF/CCNE2/CCNE1/CCND1/CCNG2/CDK12/CCND3/IKBKB/CCND2/IGF1R/PRKAR2A/PHKA1/CCNT1/MAP3K7	15
GO:1902554	CC	GO:1902554	serine/threonine protein kinase complex	13/608	89/19559	3.58601e-06	0.00051011	0.000479393	CDKN1A/CCNF/CCNE2/CCNE1/CCND1/CCNG2/CDK12/CCND3/IKBKB/CCND2/PHKA1/CCNT1/MAP3K7	13
GO:0005942	CC	GO:0005942	phosphatidylinositol 3-kinase complex	6/608	29/19559	0.000227044	0.0258376	0.0242817	SOCS7/PIK3R4/PIK3R1/SOCS5/SOCS1/NRBF2	6
GO:0016538	MF	GO:0016538	cyclin-dependent protein serine/threonine kinase regulator activity	10/614	50/18352	5.01103e-06	0.00405392	0.0039508	CDKN1A/CCNF/CCNE2/CCNE1/CCND1/CCNG2/HEXIM1/CCND3/CCND2/CCNT1	10
GO:0019207	MF	GO:0019207	kinase regulator activity	20/614	216/18352	4.06218e-05	0.0164315	0.0160135	DUSP19/SOCS7/CDKN1A/CCNF/CCNE2/CCNE1/CCND1/CCNG2/HEXIM1/CCND3/PIK3R1/CCND2/TAOK1/SOCS5/PRKAR2A/SOCS1/DDX3X/SPRED1/CCNT1/IL2	20
GO:0004674	MF	GO:0004674	protein serine/threonine kinase activity	30/614	435/18352	0.000158432	0.0284063	0.0276837	HASPIN/STK17B/NME2/BRSK1/TESK2/MINK1/RPS6KA2/GRK3/MAP3K9/BMPR1A/TRPM6/CHEK1/CDK12/UHMK1/PIK3R4/RPS6KA3/CCND3/IKBKB/TAOK1/STK38/AKT3/TLK1/CSNK1G3/PHKA1/BUB1/MAP4K2/CDK17/WNK3/MAP3K7/CASK	30
GO:0044389	MF	GO:0044389	ubiquitin-like protein ligase binding	24/614	316/18352	0.000171777	0.0284063	0.0276837	HSPA6/DTX3L/NKD2/ATXN3/TRAF6/RFFL/HM13/TP53/CDKN1A/ATF6/CD40/RPL23/SKI/FBXW7/BCL2/PRKAR2A/SMAD7/YWHAZ/RTN4/CACUL1/SMAD2/CUL3/HSPA8/NPLOC4	24
GO:0031625	MF	GO:0031625	ubiquitin protein ligase binding	23/614	297/18352	0.000175564	0.0284063	0.0276837	HSPA6/NKD2/ATXN3/TRAF6/RFFL/HM13/TP53/CDKN1A/ATF6/CD40/RPL23/SKI/FBXW7/BCL2/PRKAR2A/SMAD7/YWHAZ/RTN4/CACUL1/SMAD2/CUL3/HSPA8/NPLOC4	23
