# Supplementary material for: Crucial role of hsa-mir-503, hsa-mir-1247, and their validation in prostate cancer
Source: Aging (Albany NY). 2023 Nov 16;15(22):12966–81. doi: 10.18632/aging.205213 (PMC10713397; doi:10.18632/aging.205213)
Supplement: Supplementary Table 3 [file aging-15-205213-s003.xlsx]

## Sheet: ALL
Supplementary Table 3. Detailed miRNA-mRNA correlation relationships.
miRNA	GeneSymbol	cor(pearson)	pvalue
hsa_mir_1247	GXYLT2	0.483118	9.9e-30
hsa_mir_1247	C3	0.468851	7.09e-28
hsa_mir_1247	VCAM1	0.464002	2.89e-27
hsa_mir_1247	KPNA3	0.453479	5.67e-26
hsa_mir_1247	NNT	0.451796	9.04e-26
hsa_mir_1247	FGF2	0.449772	1.58e-25
hsa_mir_1247	PRICKLE1	0.438833	3.01e-24
hsa_mir_1247	VSTM4	0.438484	3.3e-24
hsa_mir_1247	SOD2	0.437756	4.01e-24
hsa_mir_1247	FOSL2	0.435787	6.72e-24
hsa_mir_1247	ITGA2	0.431232	2.2e-23
hsa_mir_1247	SPRED1	0.431179	2.23e-23
hsa_mir_1247	TEAD1	0.429566	3.37e-23
hsa_mir_1247	REL	0.429542	3.4e-23
hsa_mir_1247	PBX1	0.428941	3.96e-23
hsa_mir_1247	ZNF106	0.420803	3.1e-22
hsa_mir_1247	FRK	0.419302	4.5e-22
hsa_mir_1247	KIAA1614	0.418541	5.43e-22
hsa_mir_1247	SOCS5	0.414242	1.56e-21
hsa_mir_1247	CREBRF	0.413714	1.78e-21
hsa_mir_1247	IL10	0.413628	1.81e-21
hsa_mir_1247	B4GALT5	0.413242	1.99e-21
hsa_mir_1247	LYZ	0.412616	2.32e-21
hsa_mir_1247	SLC2A3	0.411716	2.88e-21
hsa_mir_1247	SALL1	0.408778	5.85e-21
hsa_mir_1247	SERTAD2	0.407994	7.06e-21
hsa_mir_1247	EGR3	0.407564	7.82e-21
hsa_mir_1247	CCSER2	0.404132	1.76e-20
hsa_mir_1247	SMAD7	0.404028	1.81e-20
hsa_mir_1247	PIK3R1	0.400103	4.53e-20
hsa_mir_1247	CCND2	0.399533	5.17e-20
hsa_mir_1247	DUSP19	0.398053	7.28e-20
hsa_mir_1247	RIMS3	0.396865	9.58e-20
hsa_mir_1247	FNDC3B	0.396834	9.65e-20
hsa_mir_1247	CYBRD1	0.39577	1.23e-19
hsa_mir_1247	SFT2D2	0.394809	1.53e-19
hsa_mir_1247	SESTD1	0.39278	2.44e-19
hsa_mir_1247	KIAA1551	0.388254	6.74e-19
hsa_mir_1247	TLL1	0.388056	7.05e-19
hsa_mir_1247	MAP3K7	0.387936	7.24e-19
hsa_mir_1247	TRAF6	0.387787	7.48e-19
hsa_mir_1247	ZMAT3	0.385538	1.23e-18
hsa_mir_1247	STK17B	0.384868	1.43e-18
hsa_mir_1247	DDX3X	0.384762	1.46e-18
hsa_mir_1247	ELMSAN1	0.379944	4.2e-18
hsa_mir_1247	RIF1	0.378615	5.6e-18
hsa_mir_1247	RC3H1	0.375583	1.08e-17
hsa_mir_1247	USP53	0.374889	1.25e-17
hsa_mir_1247	PLEKHA1	0.373537	1.66e-17
hsa_mir_1247	ZNF805	0.371806	2.4e-17
hsa_mir_1247	ZDBF2	0.371711	2.45e-17
hsa_mir_1247	CAPZA2	0.371697	2.45e-17
hsa_mir_1247	SINHCAF	0.369578	3.83e-17
hsa_mir_1247	ATF6	0.369372	4e-17
hsa_mir_1247	TMEM106B	0.369107	4.23e-17
hsa_mir_1247	TOR1AIP1	0.365729	8.53e-17
hsa_mir_1247	PLEKHG2	0.36558	8.79e-17
hsa_mir_1247	PRKAR2A	0.364509	1.1e-16
hsa_mir_1247	IREB2	0.363064	1.48e-16
hsa_mir_1247	MTMR10	0.362654	1.6e-16
hsa_mir_1247	PAPOLG	0.362516	1.65e-16
hsa_mir_1247	AQR	0.360874	2.31e-16
hsa_mir_1247	UGGT1	0.360421	2.53e-16
hsa_mir_1247	ZNF704	0.360154	2.67e-16
hsa_mir_1247	IGF2R	0.360024	2.74e-16
hsa_mir_1247	ZNRF3	0.359528	3.03e-16
hsa_mir_1247	SLC24A4	0.359172	3.25e-16
hsa_mir_1247	BNIP2	0.35813	4.01e-16
hsa_mir_1247	FOXK1	0.356978	5.06e-16
hsa_mir_1247	GPR75	0.356693	5.36e-16
hsa_mir_1247	RAPH1	0.355895	6.28e-16
hsa_mir_1247	RBM43	0.355185	7.24e-16
hsa_mir_1247	DCP1A	0.354459	8.36e-16
hsa_mir_1247	KIAA1671	0.354452	8.37e-16
hsa_mir_1247	SOX9	0.353944	9.26e-16
hsa_mir_1247	ASH1L	0.353186	1.08e-15
hsa_mir_1247	PLPP3	0.352384	1.26e-15
hsa_mir_1247	AGO1	0.352142	1.32e-15
hsa_mir_1247	TIGAR	0.351215	1.59e-15
hsa_mir_1247	SPTLC3	0.35095	1.67e-15
hsa_mir_1247	CHMP1B	0.350267	1.91e-15
hsa_mir_1247	LAX1	0.350238	1.92e-15
hsa_mir_1247	SMC5	0.349924	2.04e-15
hsa_mir_1247	CD40	0.3497	2.13e-15
hsa_mir_1247	SBNO1	0.349472	2.23e-15
hsa_mir_1247	SMAD2	0.349455	2.24e-15
hsa_mir_1247	CERK	0.34838	2.76e-15
hsa_mir_1247	NRBF2	0.34791	3.02e-15
hsa_mir_1247	ZNF843	0.347667	3.17e-15
hsa_mir_1247	ZNF611	0.346863	3.7e-15
hsa_mir_1247	FGFR1	0.346018	4.36e-15
hsa_mir_1247	BTLA	0.344455	5.88e-15
hsa_mir_1247	TAOK1	0.343948	6.48e-15
hsa_mir_1247	TRAPPC10	0.343939	6.49e-15
hsa_mir_1247	PURB	0.342849	8e-15
hsa_mir_1247	LYVE1	0.339935	1.39e-14
hsa_mir_1247	BPTF	0.337766	2.09e-14
hsa_mir_1247	BTN3A3	0.337432	2.22e-14
hsa_mir_1247	CDK12	0.335448	3.21e-14
hsa_mir_1247	SELPLG	0.332944	5.1e-14
hsa_mir_1247	UBR3	0.332914	5.13e-14
hsa_mir_1247	SPPL2A	0.331453	6.7e-14
hsa_mir_1247	KIAA0513	0.331236	6.98e-14
hsa_mir_1247	NCKAP1	0.329918	8.87e-14
hsa_mir_1247	KIAA0408	0.32973	9.18e-14
hsa_mir_1247	ZNF573	0.32884	1.08e-13
hsa_mir_1247	IFNAR1	0.328757	1.09e-13
hsa_mir_1247	STK38	0.327636	1.34e-13
hsa_mir_1247	WEE1	0.325675	1.91e-13
hsa_mir_1247	TMEM170A	0.325103	2.11e-13
hsa_mir_1247	LIMS1	0.324313	2.43e-13
hsa_mir_1247	KANK1	0.323717	2.7e-13
hsa_mir_1247	SLC26A2	0.323071	3.03e-13
hsa_mir_1247	TRAK1	0.323056	3.04e-13
hsa_mir_1247	KCTD20	0.322785	3.19e-13
hsa_mir_1247	KIF5B	0.321282	4.16e-13
hsa_mir_1247	NUFIP2	0.320067	5.15e-13
hsa_mir_1247	CCNT1	0.318873	6.34e-13
hsa_mir_1247	N4BP1	0.318744	6.49e-13
hsa_mir_1247	FBXW7	0.318731	6.5e-13
hsa_mir_1247	PARP11	0.317821	7.62e-13
hsa_mir_1247	DR1	0.317279	8.37e-13
hsa_mir_1247	USP1	0.317184	8.51e-13
hsa_mir_1247	CRISPLD2	0.316383	9.77e-13
hsa_mir_1247	UHMK1	0.316344	9.84e-13
hsa_mir_1247	ANKRD40	0.315793	1.08e-12
hsa_mir_1247	CA8	0.315401	1.16e-12
hsa_mir_1247	NOM1	0.315156	1.21e-12
hsa_mir_1247	SLC2A5	0.314977	1.25e-12
hsa_mir_1247	ACTR2	0.314835	1.28e-12
hsa_mir_1247	ZMYM1	0.314608	1.33e-12
hsa_mir_1247	JARID2	0.314536	1.34e-12
hsa_mir_1247	TERF2	0.314351	1.39e-12
hsa_mir_1247	CSNK1G3	0.314015	1.47e-12
hsa_mir_1247	TFDP2	0.313717	1.55e-12
hsa_mir_1247	LURAP1L	0.313234	1.68e-12
hsa_mir_1247	ATXN1	0.312815	1.8e-12
hsa_mir_1247	DCAF10	0.311956	2.09e-12
hsa_mir_1247	PI4K2B	0.311945	2.09e-12
hsa_mir_1247	MSX2	0.311548	2.24e-12
hsa_mir_1247	SSBP2	0.311547	2.24e-12
hsa_mir_1247	SEC24A	0.311526	2.25e-12
hsa_mir_1247	SOCS1	0.311005	2.45e-12
hsa_mir_1247	CDC42SE2	0.310895	2.5e-12
hsa_mir_1247	SF3B3	0.309948	2.93e-12
hsa_mir_1247	PPIP5K2	0.308719	3.61e-12
hsa_mir_1247	LIX1L	0.307192	4.66e-12
hsa_mir_1247	EXPH5	0.305459	6.21e-12
hsa_mir_1247	AP2B1	0.30533	6.35e-12
hsa_mir_1247	CAND1	0.305283	6.4e-12
hsa_mir_1247	KLHL15	0.304224	7.62e-12
hsa_mir_1247	AKT3	0.304007	7.9e-12
hsa_mir_1247	MYO5A	0.303894	8.05e-12
hsa_mir_1247	CYP20A1	0.30348	8.62e-12
hsa_mir_1247	WAC	0.303236	8.97e-12
hsa_mir_1247	S100A16	0.30304	9.26e-12
hsa_mir_1247	SCD5	0.302617	9.93e-12
hsa_mir_1247	CCDC117	0.302502	1.01e-11
hsa_mir_1247	TSC22D2	0.301854	1.13e-11
hsa_mir_1247	SKI	0.301334	1.23e-11
hsa_mir_1247	SNTB2	0.301142	1.26e-11
hsa_mir_1247	B3GALNT2	0.300944	1.31e-11
hsa_mir_1247	L1CAM	0.300547	1.39e-11
hsa_mir_1247	ZNF620	0.300346	1.44e-11
hsa_mir_1247	RBBP8	0.298158	2.05e-11
hsa_mir_1247	EVI5	0.297747	2.19e-11
hsa_mir_1247	LANCL1	0.296748	2.57e-11
hsa_mir_1247	DNTTIP2	0.293675	4.2e-11
hsa_mir_1247	INO80	0.293522	4.3e-11
hsa_mir_1247	BZW1	0.293462	4.34e-11
hsa_mir_1247	FAM212B	0.293211	4.52e-11
hsa_mir_1247	MTPN	0.292883	4.76e-11
hsa_mir_1247	MOB4	0.292651	4.94e-11
hsa_mir_1247	SERBP1	0.292613	4.97e-11
hsa_mir_1247	TCF20	0.291876	5.58e-11
hsa_mir_1247	CDC14A	0.291491	5.93e-11
hsa_mir_1247	ZNF70	0.291153	6.25e-11
hsa_mir_1247	TMEM245	0.290662	6.75e-11
hsa_mir_1247	TGS1	0.290185	7.28e-11
hsa_mir_1247	CLTC	0.289196	8.49e-11
hsa_mir_1247	SLC7A14	0.28874	9.11e-11
hsa_mir_1247	CYP26B1	0.288103	1.01e-10
hsa_mir_1247	FBXL18	0.287931	1.03e-10
hsa_mir_1247	ZNF35	0.287636	1.08e-10
hsa_mir_1247	MPL	0.287588	1.09e-10
hsa_mir_1247	HCFC2	0.287558	1.09e-10
hsa_mir_1247	MIGA1	0.287359	1.13e-10
hsa_mir_1247	PPP2R5C	0.287332	1.13e-10
hsa_mir_1247	CRK	0.286857	1.22e-10
hsa_mir_1247	ASCC1	0.286517	1.29e-10
hsa_mir_1247	TAF8	0.285202	1.57e-10
hsa_mir_1247	LRP10	0.284494	1.75e-10
hsa_mir_1247	LRRC58	0.282218	2.48e-10
hsa_mir_1247	TBCCD1	0.28221	2.48e-10
hsa_mir_1247	EXT1	0.281544	2.75e-10
hsa_mir_1247	SLC25A12	0.281071	2.95e-10
hsa_mir_1247	PDE12	0.280631	3.15e-10
hsa_mir_1247	CUL3	0.280479	3.22e-10
hsa_mir_1247	SFMBT2	0.278402	4.4e-10
hsa_mir_1247	BMPR1A	0.278233	4.51e-10
hsa_mir_1247	TNFRSF11A	0.277921	4.73e-10
hsa_mir_1247	RECK	0.277636	4.93e-10
hsa_mir_1247	ORC4	0.277636	4.93e-10
hsa_mir_1247	MARVELD2	0.277251	5.22e-10
hsa_mir_1247	ZNF451	0.277111	5.33e-10
hsa_mir_1247	YTHDC1	0.276896	5.51e-10
hsa_mir_1247	ULBP3	0.275739	6.53e-10
hsa_mir_1247	PLAG1	0.274922	7.37e-10
hsa_mir_1247	ARPIN	0.274749	7.56e-10
hsa_mir_1247	FANCM	0.273981	8.46e-10
hsa_mir_1247	GK5	0.272388	1.07e-09
hsa_mir_1247	VOPP1	0.270853	1.33e-09
hsa_mir_1247	SPI1	0.270755	1.35e-09
hsa_mir_1247	BCL2	0.269326	1.66e-09
hsa_mir_1247	CNNM4	0.268831	1.79e-09
hsa_mir_1247	IL2	0.268768	1.8e-09
hsa_mir_1247	ZNF264	0.268128	1.97e-09
hsa_mir_1247	TIFA	0.267611	2.13e-09
hsa_mir_1247	CD2AP	0.267196	2.26e-09
hsa_mir_1247	PPIL4	0.266003	2.67e-09
hsa_mir_1247	ATG12	0.265963	2.69e-09
hsa_mir_1247	MCM8	0.26543	2.9e-09
hsa_mir_1247	ZBTB44	0.264427	3.34e-09
hsa_mir_503	BIRC5	0.263852	3.62e-09
hsa_mir_1247	TXNDC5	0.263077	4.04e-09
hsa_mir_1247	HOOK3	0.262138	4.6e-09
hsa_mir_1247	SIGLEC9	0.261081	5.33e-09
hsa_mir_1247	SOCS7	0.260892	5.48e-09
hsa_mir_1247	RALGAPB	0.260444	5.83e-09
hsa_mir_1247	USP48	0.260362	5.89e-09
hsa_mir_1247	DTX3L	0.260261	5.98e-09
hsa_mir_1247	ADH5	0.259154	6.96e-09
hsa_mir_1247	INTU	0.258967	7.15e-09
hsa_mir_1247	ZC3H11A	0.258896	7.22e-09
hsa_mir_1247	TG	0.258679	7.43e-09
hsa_mir_1247	IFITM1	0.257856	8.32e-09
hsa_mir_1247	GGCX	0.257212	9.09e-09
hsa_mir_1247	CEP104	0.256728	9.71e-09
hsa_mir_1247	CREBL2	0.25577	1.11e-08
hsa_mir_1247	SLC30A7	0.255689	1.12e-08
hsa_mir_1247	TXK	0.255506	1.15e-08
hsa_mir_1247	PSME3	0.254442	1.32e-08
hsa_mir_1247	PLEKHG5	0.25225	1.78e-08
hsa_mir_1247	BRD7	0.252013	1.84e-08
hsa_mir_1247	RNF115	0.251984	1.84e-08
hsa_mir_1247	CTSA	0.251732	1.91e-08
hsa_mir_1247	MAP3K9	0.250548	2.23e-08
hsa_mir_1247	ABHD17B	0.249971	2.41e-08
hsa_mir_1247	SLC25A32	0.249265	2.65e-08
hsa_mir_503	CBX2	0.249028	2.73e-08
hsa_mir_1247	FKTN	0.24847	2.94e-08
hsa_mir_1247	EIF4H	0.248392	2.97e-08
hsa_mir_1247	PEAK3	0.248323	3e-08
hsa_mir_1247	TRMT2B	0.248096	3.09e-08
hsa_mir_1247	DSG3	0.24758	3.3e-08
hsa_mir_1247	SF3B1	0.247579	3.3e-08
hsa_mir_1247	CASK	0.247458	3.36e-08
hsa_mir_1247	MMS22L	0.2474	3.38e-08
hsa_mir_1247	MTMR3	0.247366	3.4e-08
hsa_mir_1247	AVL9	0.247159	3.49e-08
hsa_mir_1247	TRPM6	0.246887	3.62e-08
hsa_mir_1247	CTDSPL	0.246444	3.83e-08
hsa_mir_1247	TCEANC2	0.246405	3.85e-08
hsa_mir_1247	CDC37L1	0.245455	4.36e-08
hsa_mir_1247	MINK1	0.24532	4.44e-08
hsa_mir_1247	GREM2	0.245308	4.44e-08
hsa_mir_1247	CCND3	0.244301	5.06e-08
hsa_mir_1247	DCAF17	0.244266	5.09e-08
hsa_mir_1247	NUCKS1	0.243978	5.28e-08
hsa_mir_1247	SLC30A5	0.243975	5.28e-08
hsa_mir_1247	CANX	0.243371	5.71e-08
hsa_mir_1247	SLC35F5	0.243123	5.89e-08
hsa_mir_1247	NWD1	0.242118	6.71e-08
hsa_mir_1247	CNNM3	0.241461	7.29e-08
hsa_mir_1247	BRAP	0.240769	7.97e-08
hsa_mir_1247	CYP51A1	0.240349	8.4e-08
hsa_mir_503	KIAA0895L	0.240178	8.59e-08
hsa_mir_1247	MIEF1	0.240083	8.69e-08
hsa_mir_1247	PLAA	0.239771	9.04e-08
hsa_mir_1247	IL10RB	0.238662	1.04e-07
hsa_mir_1247	DLST	0.238307	1.09e-07
hsa_mir_1247	ATP6V1B2	0.238278	1.09e-07
hsa_mir_1247	CACUL1	0.237931	1.14e-07
hsa_mir_1247	RPS6KA2	0.237827	1.16e-07
hsa_mir_1247	NMNAT1	0.236533	1.36e-07
hsa_mir_1247	CARD10	0.235877	1.48e-07
hsa_mir_1247	GRK3	0.235831	1.48e-07
hsa_mir_1247	DCTN5	0.235476	1.55e-07
hsa_mir_1247	IGF1R	0.235422	1.56e-07
hsa_mir_1247	GNPTAB	0.23525	1.6e-07
hsa_mir_1247	ACOT9	0.234595	1.73e-07
hsa_mir_1247	ORAI2	0.234404	1.77e-07
hsa_mir_1247	ZFHX4	0.234157	1.83e-07
hsa_mir_1247	ALG9	0.233564	1.97e-07
hsa_mir_1247	DDHD2	0.233241	2.05e-07
hsa_mir_1247	PRDM4	0.232927	2.13e-07
hsa_mir_1247	TMEM100	0.231799	2.44e-07
hsa_mir_1247	CRCP	0.231688	2.47e-07
hsa_mir_1247	OSCAR	0.231235	2.62e-07
hsa_mir_1247	SREK1	0.230559	2.84e-07
hsa_mir_1247	LARP1	0.230529	2.85e-07
hsa_mir_1247	E2F3	0.230461	2.87e-07
hsa_mir_1247	TRIM35	0.229995	3.04e-07
hsa_mir_1247	STX2	0.229657	3.17e-07
hsa_mir_1247	YY1	0.229206	3.35e-07
hsa_mir_1247	RAB3B	0.229072	3.4e-07
hsa_mir_1247	POU3F1	0.228392	3.69e-07
hsa_mir_1247	SEMA3E	0.228319	3.72e-07
hsa_mir_1247	NPR1	0.228175	3.79e-07
hsa_mir_1247	ACOX1	0.228135	3.81e-07
hsa_mir_1247	NUP50	0.227453	4.13e-07
hsa_mir_1247	MCF2L2	0.226787	4.48e-07
hsa_mir_1247	LDLR	0.224535	5.85e-07
hsa_mir_1247	UGGT2	0.224096	6.16e-07
hsa_mir_1247	NKD2	0.223991	6.24e-07
hsa_mir_1247	ZCCHC4	0.222298	7.62e-07
hsa_mir_503	LRFN1	0.222166	7.73e-07
hsa_mir_1247	FAM229B	0.221561	8.3e-07
hsa_mir_1247	ZFYVE9	0.221537	8.32e-07
hsa_mir_1247	CNNM2	0.220792	9.08e-07
hsa_mir_1247	PHKA1	0.220019	9.93e-07
hsa_mir_1247	RPS6KA3	0.219842	1.01e-06
hsa_mir_1247	GLP2R	0.219419	1.06e-06
hsa_mir_1247	CMTM4	0.219181	1.09e-06
hsa_mir_1247	TRIM72	0.217953	1.26e-06
hsa_mir_503	RNF222	0.217368	1.35e-06
hsa_mir_1247	GTPBP10	0.21729	1.36e-06
hsa_mir_1247	DNAJC10	0.215807	1.61e-06
hsa_mir_1247	UBN2	0.215432	1.68e-06
hsa_mir_1247	ZNF585B	0.215257	1.71e-06
hsa_mir_1247	TOMM20	0.215014	1.76e-06
hsa_mir_1247	CDKN1A	0.214707	1.82e-06
hsa_mir_1247	SBF1	0.214041	1.97e-06
hsa_mir_1247	RTN4	0.213702	2.04e-06
hsa_mir_1247	SETD1B	0.213076	2.19e-06
hsa_mir_1247	MESD	0.211583	2.59e-06
hsa_mir_1247	UBFD1	0.210424	2.95e-06
hsa_mir_1247	RFFL	0.210308	2.98e-06
hsa_mir_1247	NIF3L1	0.209624	3.22e-06
hsa_mir_1247	NAPG	0.209125	3.4e-06
hsa_mir_1247	SIAE	0.208526	3.63e-06
hsa_mir_1247	HSD17B12	0.208262	3.74e-06
hsa_mir_1247	SZRD1	0.207873	3.9e-06
hsa_mir_1247	ARHGEF19	0.207217	4.19e-06
hsa_mir_503	P2RY11	0.205966	4.8e-06
hsa_mir_1247	HNRNPK	0.205359	5.13e-06
hsa_mir_1247	SGPP2	0.204909	5.38e-06
hsa_mir_1247	FSCN1	0.204491	5.63e-06
hsa_mir_1247	SNAPC3	0.202966	6.63e-06
hsa_mir_1247	TNFRSF13C	0.20174	7.55e-06
hsa_mir_1247	SRGAP1	0.20051	8.6e-06
hsa_mir_1247	PTPRD	0.200404	8.7e-06
hsa_mir_1247	ITGAX	0.200076	9e-06
hsa_mir_1247	TFCP2	0.199458	9.61e-06
hsa_mir_1247	PIK3R4	0.198838	1.03e-05
hsa_mir_1247	THAP6	0.198818	1.03e-05
hsa_mir_1247	CDK17	0.197385	1.19e-05
hsa_mir_1247	COL1A1	0.196738	1.28e-05
hsa_mir_1247	CCDC36	0.196032	1.37e-05
hsa_mir_1247	ANK3	0.195862	1.4e-05
hsa_mir_1247	CRIPT	0.195631	1.43e-05
hsa_mir_1247	ZNF587	0.194986	1.53e-05
hsa_mir_1247	SVOP	0.194877	1.55e-05
hsa_mir_1247	C15orf38_AP3S2	0.194163	1.66e-05
hsa_mir_503	HJURP	0.192287	2.01e-05
hsa_mir_1247	ETFDH	0.190983	2.29e-05
hsa_mir_1247	PPP1R11	0.190472	2.41e-05
hsa_mir_1247	PPP6R1	0.189942	2.55e-05
hsa_mir_1247	SLC33A1	0.188869	2.83e-05
hsa_mir_1247	RFK	0.188428	2.96e-05
hsa_mir_1247	AP3S2	0.186782	3.48e-05
hsa_mir_1247	YWHAZ	0.184157	4.5e-05
hsa_mir_1247	ATAD5	0.183065	5e-05
hsa_mir_1247	MRPL10	0.181455	5.84e-05
hsa_mir_1247	HAUS3	0.180682	6.29e-05
hsa_mir_1247	HECTD3	0.180521	6.38e-05
hsa_mir_1247	L2HGDH	0.179789	6.84e-05
hsa_mir_503	CBARP	0.179145	7.27e-05
hsa_mir_1247	TP53	0.178613	7.65e-05
hsa_mir_503	CCDC83	0.178537	7.7e-05
hsa_mir_1247	CPM	0.17814	7.99e-05
hsa_mir_1247	MRPS14	0.177552	8.45e-05
hsa_mir_1247	PPM1A	0.177058	8.85e-05
hsa_mir_1247	ZNF91	0.176464	9.35e-05
hsa_mir_1247	CKAP4	0.174958	0.000107492
hsa_mir_503	LRWD1	0.17473	0.000109783
hsa_mir_1247	UTP11	0.17429	0.000114315
hsa_mir_1247	ZNF639	0.173771	0.000119892
hsa_mir_503	CBX4	0.172686	0.0001324
hsa_mir_1247	ZBTB34	0.172606	0.00013337
hsa_mir_1247	BPNT1	0.171467	0.000147909
hsa_mir_503	AKR1D1	0.169929	0.000169893
hsa_mir_1247	EFHD2	0.169427	0.00017771
hsa_mir_1247	SRPRA	0.16928	0.000180063
hsa_mir_503	BUB1	0.168804	0.000187889
hsa_mir_1247	SEC16A	0.168603	0.00019129
hsa_mir_1247	CLCN5	0.167931	0.000203067
hsa_mir_1247	LIPC	0.167898	0.000203666
hsa_mir_1247	NONO	0.167771	0.000205969
hsa_mir_1247	XKR7	0.167686	0.000207534
hsa_mir_1247	TESK2	0.167247	0.000215759
hsa_mir_1247	TXNDC15	0.167018	0.000220169
hsa_mir_1247	CDC14B	0.166992	0.000220674
hsa_mir_1247	TRIM59	0.166383	0.000232829
hsa_mir_1247	OCRL	0.16626	0.000235375
hsa_mir_503	NME2	0.166198	0.000236661
hsa_mir_1247	NPLOC4	0.165534	0.000250853
hsa_mir_1247	ZNRF2	0.16532	0.000255581
hsa_mir_1247	DNAL1	0.165316	0.000255683
hsa_mir_1247	TMEM184B	0.165039	0.000261945
hsa_mir_1247	HSPA8	0.164967	0.000263605
hsa_mir_1247	ADRA2B	0.164369	0.000277688
hsa_mir_503	MCM7	0.163963	0.000287672
hsa_mir_1247	BTD	0.163544	0.000298302
hsa_mir_1247	PNRC2	0.161911	0.000343385
hsa_mir_1247	ANK1	0.161407	0.000358526
hsa_mir_503	DECR1	0.160503	0.000387253
hsa_mir_1247	HMGB1	0.159745	0.000412984
hsa_mir_1247	PISD	0.159331	0.000427694
hsa_mir_1247	KCNE3	0.155644	0.000582025
hsa_mir_1247	TSPAN31	0.155439	0.000591993
hsa_mir_1247	SLX4	0.155394	0.000594182
hsa_mir_1247	TPCN2	0.152262	0.000767642
hsa_mir_1247	ZFP30	0.152193	0.000771947
hsa_mir_1247	TXNL1	0.152177	0.000772958
hsa_mir_503	PTGES2	0.151797	0.000797086
hsa_mir_1247	GPAT4	0.151775	0.000798499
hsa_mir_503	UQCR11	0.151124	0.000841496
hsa_mir_1247	ATXN3	0.151119	0.000841847
hsa_mir_1247	ATP5S	0.149845	0.000932337
hsa_mir_503	EPOR	0.149292	0.000974356
hsa_mir_1247	NT5DC3	0.148922	0.00100343
hsa_mir_1247	CHAC1	0.148818	0.00101173
hsa_mir_503	MRGBP	0.14858	0.00103104
hsa_mir_1247	YRDC	0.14852	0.00103593
hsa_mir_1247	TTC9C	0.148041	0.00107593
hsa_mir_503	DNAH17	0.146887	0.00117812
hsa_mir_1247	ZNF566	0.146825	0.00118385
hsa_mir_1247	HACD2	0.145861	0.00127652
hsa_mir_503	SDHAF1	0.144729	0.00139376
hsa_mir_503	RPL35A	0.144113	0.00146168
hsa_mir_1247	GATC	0.143936	0.00148166
hsa_mir_1247	PARD6B	0.143861	0.0014903
hsa_mir_503	SNRPD1	0.143104	0.00157943
hsa_mir_1247	PRPF4	0.142641	0.00163631
hsa_mir_1247	DVL3	0.142558	0.00164671
hsa_mir_1247	VBP1	0.141765	0.00174911
hsa_mir_503	SGO1	0.141729	0.00175393
hsa_mir_503	CCNE2	0.141261	0.00181724
hsa_mir_503	KIF23	0.140389	0.00194085
hsa_mir_1247	MYB	0.139915	0.00201134
hsa_mir_1247	C8orf37	0.139583	0.00206192
hsa_mir_1247	MAP4K2	0.139343	0.00209929
hsa_mir_503	ZNF419	0.138553	0.00222669
hsa_mir_1247	PDE4C	0.13844	0.00224551
hsa_mir_1247	RDH13	0.138235	0.00227999
hsa_mir_1247	CLN8	0.137831	0.00234933
hsa_mir_1247	DYNLL2	0.137243	0.0024536
hsa_mir_503	BCL2L12	0.136463	0.00259845
hsa_mir_1247	DCLRE1A	0.136149	0.0026589
hsa_mir_503	GCM1	0.135709	0.0027459
hsa_mir_503	COL1A1	0.135385	0.00281151
hsa_mir_503	DENND6B	0.135121	0.0028661
hsa_mir_1247	DHFR	0.134559	0.00298548
hsa_mir_503	RPL18A	0.13384	0.00314492
hsa_mir_503	KLC2	0.132786	0.00339251
hsa_mir_1247	GTF3C6	0.132707	0.00341168
hsa_mir_1247	ODF2L	0.129834	0.00418248
hsa_mir_503	NSD2	0.128594	0.0045616
hsa_mir_1247	TFAP2A	0.128436	0.00461214
hsa_mir_503	FANCA	0.128021	0.00474707
hsa_mir_503	QPCTL	0.126504	0.00527103
hsa_mir_1247	GABRR2	0.125359	0.00570032
hsa_mir_1247	DHODH	0.12422	0.00615855
hsa_mir_503	PMPCA	0.123439	0.00649157
hsa_mir_503	CENPI	0.123385	0.00651497
hsa_mir_1247	IRGQ	0.122106	0.00709712
hsa_mir_1247	TLK1	0.121302	0.00748639
hsa_mir_1247	EMILIN2	0.121042	0.0076163
hsa_mir_503	SNX22	0.120824	0.00772681
hsa_mir_1247	ZNF793	0.12034	0.00797768
hsa_mir_1247	ERAP2	0.119515	0.00842118
hsa_mir_503	CCNE1	0.119225	0.00858225
hsa_mir_1247	HSD17B13	0.118888	0.00877281
hsa_mir_503	MPLKIP	0.118427	0.00903966
hsa_mir_503	ANLN	0.117607	0.00953249
hsa_mir_503	NARF	0.11658	0.0101833
hsa_mir_503	HIST1H3H	0.115767	0.010726
hsa_mir_503	NUPL2	0.115719	0.0107583
hsa_mir_503	HSPE1_MOB4	0.115178	0.0111347
hsa_mir_1247	ZFP82	0.115137	0.0111636
hsa_mir_503	GNB2	0.11429	0.0117776
hsa_mir_1247	LIPH	0.112462	0.0132049
hsa_mir_503	RCC1L	0.112194	0.0134266
hsa_mir_503	PLCXD1	0.111505	0.014011
hsa_mir_503	GEMIN6	0.110123	0.0152522
hsa_mir_1247	PSMG2	0.109733	0.0156194
hsa_mir_503	ESCO2	0.107623	0.0177431
hsa_mir_1247	PRSS21	0.106865	0.0185662
hsa_mir_1247	PSMB2	0.106554	0.018913
hsa_mir_503	MRPL36	0.106503	0.0189702
hsa_mir_1247	SLC43A2	0.105028	0.0206989
hsa_mir_1247	FFAR2	0.10413	0.0218172
hsa_mir_1247	PIGW	0.103674	0.0224042
hsa_mir_503	AHSA1	0.102851	0.0234984
hsa_mir_503	IL4	0.102587	0.0238595
hsa_mir_503	PDCL3	0.102473	0.0240175
hsa_mir_1247	SCARF1	0.102107	0.0245282
hsa_mir_1247	WDR5B	0.101633	0.025204
hsa_mir_1247	RAB3IP	0.101258	0.0257511
hsa_mir_1247	CTSD	0.0996421	0.0282217
hsa_mir_1247	HDGF	0.0981995	0.0305976
hsa_mir_1247	TARS2	0.0964587	0.0336906
hsa_mir_503	ATP6V1B1	0.0962753	0.0340315
hsa_mir_1247	PRPS1	0.095022	0.0364405
hsa_mir_1247	UGT2B4	0.0930356	0.0405548
hsa_mir_503	GJA9	0.0924661	0.0418043
hsa_mir_503	ZNF367	0.0923669	0.0420253
hsa_mir_1247	CCDC127	0.0921755	0.0424545
hsa_mir_1247	ZNF622	0.0920419	0.042756
hsa_mir_1247	ESCO2	0.0919713	0.0429162
hsa_mir_1247	ATP6V0E1	0.0917097	0.0435141
hsa_mir_1247	HCAR1	0.0916133	0.0437362
hsa_mir_1247	IVD	0.0914322	0.044156
hsa_mir_1247	IKBKB	0.0911498	0.0448173
hsa_mir_1247	TMED4	0.0910168	0.0451318
hsa_mir_1247	CENPI	0.0903088	0.0468363
hsa_mir_1247	LHPP	0.0895508	0.0487211
hsa_mir_503	HPCAL1	0.0893912	0.049126
hsa_mir_503	CDKN1A	-0.0891036	0.0498624
hsa_mir_503	PISD	-0.0893046	0.0493467
hsa_mir_503	DNTTIP2	-0.0896826	0.0483888
hsa_mir_503	MAP4K2	-0.0900778	0.0474042
hsa_mir_503	PTPRD	-0.0914756	0.0440551
hsa_mir_503	SMAD7	-0.0924683	0.0417994
hsa_mir_1247	RPL23	-0.0926153	0.0414739
hsa_mir_503	VEGFA	-0.092829	0.0410043
hsa_mir_503	GGCX	-0.0928958	0.0408585
hsa_mir_503	RFK	-0.0930842	0.0404496
hsa_mir_503	UBN2	-0.0934783	0.0396054
hsa_mir_503	UGGT2	-0.093853	0.0388164
hsa_mir_503	TSC22D2	-0.094413	0.0376624
hsa_mir_503	CMTM4	-0.094545	0.0373946
hsa_mir_503	CLTC	-0.094741	0.037
hsa_mir_503	PHKA1	-0.0952129	0.0360645
hsa_mir_503	NMNAT1	-0.0959433	0.0346561
hsa_mir_503	PPM1A	-0.0964128	0.0337755
hsa_mir_1247	RPL35A	-0.0967154	0.0332183
hsa_mir_503	MOB4	-0.0967285	0.0331944
hsa_mir_503	TSPAN31	-0.0970032	0.0326956
hsa_mir_503	TXNDC5	-0.0973769	0.0320275
hsa_mir_503	BZW1	-0.0974328	0.0319285
hsa_mir_503	ATP5S	-0.0978689	0.0311654
hsa_mir_503	PSME3	-0.0980384	0.0308732
hsa_mir_503	NR6A1	-0.0982396	0.0305293
hsa_mir_503	TBCCD1	-0.0987346	0.0296971
hsa_mir_1247	RNF222	-0.0991869	0.0289536
hsa_mir_503	PURB	-0.0992815	0.0288002
hsa_mir_503	DCTN5	-0.0998237	0.0279342
hsa_mir_1247	LRFN1	-0.100277	0.0272276
hsa_mir_503	CEP104	-0.100818	0.0264035
hsa_mir_503	SVOP	-0.101284	0.0257126
hsa_mir_503	THAP6	-0.101475	0.0254332
hsa_mir_503	MSX2	-0.101826	0.0249276
hsa_mir_503	LANCL1	-0.101893	0.0248308
hsa_mir_503	PRDM4	-0.102763	0.0236186
hsa_mir_503	ANK3	-0.103	0.0232979
hsa_mir_503	ATG12	-0.10314	0.0231097
hsa_mir_503	MCM8	-0.10326	0.0229492
hsa_mir_503	PARD6B	-0.103554	0.0225615
hsa_mir_503	UHMK1	-0.103716	0.0223493
hsa_mir_503	SLC33A1	-0.103834	0.0221958
hsa_mir_503	SLC2A3	-0.104158	0.0217804
hsa_mir_503	SLC30A5	-0.104719	0.021078
hsa_mir_503	LIMS1	-0.105199	0.0204911
hsa_mir_503	YTHDC1	-0.105667	0.0199337
hsa_mir_1247	LRWD1	-0.105692	0.0199043
hsa_mir_503	TGS1	-0.105715	0.0198776
hsa_mir_1247	B4GALT7	-0.107186	0.0182138
hsa_mir_503	DR1	-0.107243	0.018152
hsa_mir_503	PPP1R11	-0.107501	0.0178736
hsa_mir_503	TMEM245	-0.107517	0.0178572
hsa_mir_503	CSNK1G3	-0.107942	0.0174069
hsa_mir_503	PEAK3	-0.10834	0.0169953
hsa_mir_1247	GNB2	-0.10899	0.016341
hsa_mir_503	NPR1	-0.110312	0.0150772
hsa_mir_1247	SNX22	-0.11053	0.0148775
hsa_mir_503	LRRC58	-0.110716	0.0147082
hsa_mir_503	CUL3	-0.111375	0.0141237
hsa_mir_503	CHMP1B	-0.111729	0.0138188
hsa_mir_503	TCF20	-0.111762	0.0137908
hsa_mir_503	CDC14B	-0.111863	0.0137049
hsa_mir_503	ZNF35	-0.112816	0.0129169
hsa_mir_503	CAND1	-0.112848	0.0128915
hsa_mir_503	HNRNPA1L2	-0.113348	0.0124948
hsa_mir_503	DNAJC10	-0.114256	0.011803
hsa_mir_1247	HIST1H3H	-0.114357	0.011728
hsa_mir_503	ACTR2	-0.11456	0.0115786
hsa_mir_503	CASK	-0.11502	0.011247
hsa_mir_503	SREK1	-0.115398	0.0109805
hsa_mir_503	CYP51A1	-0.115424	0.0109623
hsa_mir_503	SLC24A4	-0.116041	0.0105401
hsa_mir_1247	BIRC5	-0.116101	0.0104999
hsa_mir_1247	RPL18A	-0.117234	0.00976437
hsa_mir_1247	DECR1	-0.118066	0.00925356
hsa_mir_1247	NME2	-0.118519	0.00898569
hsa_mir_503	TCEANC2	-0.118578	0.00895167
hsa_mir_503	PLEKHG2	-0.11863	0.00892107
hsa_mir_1247	BCL2L12	-0.118656	0.00890628
hsa_mir_503	VCAM1	-0.119272	0.00855579
hsa_mir_503	ZCCHC4	-0.11969	0.00832532
hsa_mir_503	PDE12	-0.11978	0.00827632
hsa_mir_503	DCAF10	-0.120006	0.00815475
hsa_mir_503	CRIPT	-0.120033	0.00813992
hsa_mir_503	RALGAPB	-0.120239	0.0080308
hsa_mir_1247	MRPL36	-0.120265	0.0080168
hsa_mir_503	BTD	-0.120407	0.00794234
hsa_mir_503	ASCC1	-0.120621	0.00783129
hsa_mir_503	PLEKHG5	-0.121266	0.00750443
hsa_mir_503	SLC35F5	-0.121552	0.00736358
hsa_mir_503	ACOT9	-0.121991	0.00715179
hsa_mir_503	ERAP2	-0.122767	0.00679061
hsa_mir_503	CDC37L1	-0.12285	0.00675312
hsa_mir_503	SEMA3E	-0.123062	0.00665778
hsa_mir_503	CYP26B1	-0.123094	0.00664367
hsa_mir_503	CNNM3	-0.123532	0.00645114
hsa_mir_1247	ATP6V1B1	-0.123781	0.00634357
hsa_mir_503	MMS22L	-0.123819	0.00632765
hsa_mir_503	CDC14A	-0.123933	0.0062792
hsa_mir_503	ADRA2B	-0.126011	0.00545209
hsa_mir_503	TXK	-0.12628	0.00535255
hsa_mir_503	STK38	-0.126995	0.00509589
hsa_mir_503	SRPRA	-0.127282	0.00499614
hsa_mir_503	WAC	-0.127507	0.00491904
hsa_mir_503	CACUL1	-0.127975	0.00476207
hsa_mir_503	USP1	-0.128299	0.00465622
hsa_mir_503	SEC24A	-0.128636	0.00454814
hsa_mir_503	CD2AP	-0.128816	0.0044915
hsa_mir_503	MINK1	-0.129888	0.0041669
hsa_mir_503	PPIL4	-0.130093	0.00410705
hsa_mir_503	TRAPPC10	-0.130101	0.00410485
hsa_mir_503	MYO5A	-0.130423	0.00401283
hsa_mir_503	ZBTB44	-0.130837	0.00389729
hsa_mir_503	FGFR1	-0.131015	0.00384836
hsa_mir_503	LHPP	-0.131112	0.00382211
hsa_mir_503	C15orf38_AP3S2	-0.131168	0.00380688
hsa_mir_503	CDNF	-0.131189	0.0038013
hsa_mir_503	CARD10	-0.131253	0.00378396
hsa_mir_503	ZNF620	-0.131256	0.00378312
hsa_mir_503	LRP10	-0.131557	0.00370326
hsa_mir_503	LYZ	-0.131686	0.00366953
hsa_mir_503	ANKRD40	-0.131868	0.00362212
hsa_mir_1247	FAM162A	-0.13245	0.00347487
hsa_mir_503	RAB3B	-0.134344	0.00303241
hsa_mir_1247	QPCTL	-0.134441	0.00301109
hsa_mir_503	AP2B1	-0.135314	0.0028261
hsa_mir_503	PPP2R5C	-0.135726	0.00274247
hsa_mir_503	TXNDC15	-0.135998	0.00268844
hsa_mir_503	NUFIP2	-0.136482	0.00259488
hsa_mir_503	RFFL	-0.137163	0.00246801
hsa_mir_503	TAOK1	-0.137815	0.00235195
hsa_mir_503	TRMT2B	-0.139025	0.00214977
hsa_mir_503	ZNF585B	-0.139303	0.00210565
hsa_mir_503	ZNF704	-0.13961	0.00205771
hsa_mir_503	MTMR3	-0.139647	0.00205211
hsa_mir_503	ALG9	-0.139883	0.00201617
hsa_mir_503	ZMYM1	-0.139965	0.00200376
hsa_mir_503	GRK3	-0.140256	0.00196038
hsa_mir_503	SLC30A7	-0.140305	0.00195321
hsa_mir_503	NAPG	-0.140965	0.00185834
hsa_mir_503	MAP3K7	-0.141205	0.00182497
hsa_mir_503	AKT3	-0.141479	0.00178753
hsa_mir_503	BPTF	-0.14255	0.00164772
hsa_mir_503	EVI5	-0.142622	0.00163869
hsa_mir_503	BTN3A3	-0.142816	0.00161458
hsa_mir_503	INO80	-0.143448	0.0015383
hsa_mir_503	LURAP1L	-0.14409	0.0014642
hsa_mir_503	LAX1	-0.144151	0.00145739
hsa_mir_503	CAPZA2	-0.144415	0.00142797
hsa_mir_503	TMEM100	-0.144846	0.00138119
hsa_mir_503	NCKAP1	-0.145215	0.00134224
hsa_mir_503	CCDC117	-0.145344	0.0013289
hsa_mir_503	INTU	-0.145446	0.00131841
hsa_mir_1247	AKR1D1	-0.145552	0.00130762
hsa_mir_503	KLHL15	-0.147035	0.00116455
hsa_mir_503	FBXW7	-0.14842	0.00104419
hsa_mir_503	IGF1R	-0.148502	0.00103738
hsa_mir_503	PPIP5K2	-0.148931	0.00100273
hsa_mir_503	SLC25A12	-0.148961	0.0010003
hsa_mir_1247	CCDC83	-0.149035	0.000994437
hsa_mir_503	FFAR2	-0.149258	0.000977013
hsa_mir_503	MARVELD2	-0.14985	0.000931941
hsa_mir_1247	IL4	-0.150678	0.000872177
hsa_mir_503	CCNT1	-0.151083	0.000844283
hsa_mir_503	RBBP8	-0.151137	0.000840637
hsa_mir_503	MYB	-0.151616	0.000808774
hsa_mir_503	BRAP	-0.151848	0.00079378
hsa_mir_503	NWD1	-0.151859	0.000793067
hsa_mir_503	BTLA	-0.151862	0.00079287
hsa_mir_1247	SDHAF1	-0.15196	0.000786667
hsa_mir_503	SF3B3	-0.15279	0.000735444
hsa_mir_503	CANX	-0.152892	0.000729407
hsa_mir_503	ZNF573	-0.15291	0.000728335
hsa_mir_503	SINHCAF	-0.152985	0.000723882
hsa_mir_503	TFDP2	-0.153325	0.000704131
hsa_mir_503	ZNF451	-0.154089	0.000661497
hsa_mir_503	PLPP3	-0.154446	0.000642425
hsa_mir_503	AP3S2	-0.154507	0.000639181
hsa_mir_503	SPPL2A	-0.154544	0.000637242
hsa_mir_1247	SLC29A2	-0.154959	0.000615876
hsa_mir_503	TRIM35	-0.15536	0.00059584
hsa_mir_503	DCP1A	-0.155692	0.000579748
hsa_mir_503	SESTD1	-0.15679	0.000529285
hsa_mir_503	CDK12	-0.158143	0.000472678
hsa_mir_1247	SPIRE2	-0.158235	0.000469054
hsa_mir_503	HCAR1	-0.158592	0.000455184
hsa_mir_503	MIGA1	-0.158617	0.000454243
hsa_mir_503	SBNO1	-0.159864	0.000408854
hsa_mir_503	ELMSAN1	-0.161323	0.000361114
hsa_mir_503	VOPP1	-0.161472	0.000356522
hsa_mir_503	BNIP2	-0.161472	0.000356517
hsa_mir_503	KIAA1551	-0.161558	0.000353924
hsa_mir_503	KIAA0408	-0.163185	0.000307699
hsa_mir_503	CREBL2	-0.164355	0.00027804
hsa_mir_503	XKR7	-0.164486	0.000274877
hsa_mir_1247	PTGES2	-0.164657	0.000270817
hsa_mir_503	BMPR1A	-0.165036	0.000262005
hsa_mir_503	CERK	-0.165547	0.00025057
hsa_mir_503	SERTAD2	-0.165586	0.000249702
hsa_mir_503	LIPH	-0.1659	0.000242936
hsa_mir_503	SMC5	-0.166711	0.000226214
hsa_mir_503	B3GALNT2	-0.167566	0.000209748
hsa_mir_503	ASH1L	-0.167798	0.000205483
hsa_mir_503	NT5DC3	-0.169138	0.00018237
hsa_mir_503	AGO1	-0.169661	0.000174038
hsa_mir_503	ZNF264	-0.170677	0.000158844
hsa_mir_503	IFNAR1	-0.170899	0.000155689
hsa_mir_503	IFITM1	-0.171137	0.000152378
hsa_mir_503	CDC42SE2	-0.17147	0.000147857
hsa_mir_503	TIGAR	-0.172241	0.000137872
hsa_mir_503	IGF2R	-0.172261	0.000137619
hsa_mir_503	SRGAP1	-0.172565	0.000133867
hsa_mir_1247	TUT1	-0.172644	0.000132904
hsa_mir_503	ZNRF3	-0.172653	0.0001328
hsa_mir_503	FAM212B	-0.173121	0.000127244
hsa_mir_503	B4GALT5	-0.173372	0.000124361
hsa_mir_503	TERF2	-0.173976	0.000117665
hsa_mir_503	SLC26A2	-0.17406	0.000116759
hsa_mir_503	SMAD2	-0.174663	0.000110456
hsa_mir_503	GK5	-0.175266	0.000104475
hsa_mir_503	IL10RB	-0.175317	0.000103991
hsa_mir_503	ACOX1	-0.175542	0.000101847
hsa_mir_503	MESD	-0.175625	0.00010107
hsa_mir_503	ZNF843	-0.176109	9.66e-05
hsa_mir_503	HCFC2	-0.176484	9.33e-05
hsa_mir_503	TNFRSF11A	-0.177079	8.83e-05
hsa_mir_503	UBR3	-0.177288	8.66e-05
hsa_mir_503	SNTB2	-0.178369	7.82e-05
hsa_mir_503	DDX3X	-0.178591	7.66e-05
hsa_mir_503	KIF5B	-0.178856	7.47e-05
hsa_mir_503	LIX1L	-0.178943	7.41e-05
hsa_mir_503	GREM2	-0.179579	6.98e-05
hsa_mir_503	SSBP2	-0.18056	6.36e-05
hsa_mir_503	TP53	-0.180757	6.24e-05
hsa_mir_503	ZNF805	-0.180878	6.17e-05
hsa_mir_503	ADH5	-0.180966	6.12e-05
hsa_mir_503	AQR	-0.18266	5.2e-05
hsa_mir_503	EGR3	-0.183372	4.86e-05
hsa_mir_503	SOCS5	-0.183386	4.85e-05
hsa_mir_503	IREB2	-0.18343	4.83e-05
hsa_mir_1247	P2RY11	-0.18406	4.54e-05
hsa_mir_503	EFHD2	-0.184544	4.34e-05
hsa_mir_503	N4BP1	-0.185178	4.08e-05
hsa_mir_503	ULBP3	-0.185704	3.87e-05
hsa_mir_503	FNDC3B	-0.18602	3.75e-05
hsa_mir_503	TAF8	-0.186506	3.58e-05
hsa_mir_503	NRBF2	-0.186544	3.57e-05
hsa_mir_503	PRICKLE1	-0.18668	3.52e-05
hsa_mir_503	ATXN1	-0.186685	3.52e-05
hsa_mir_503	CCND3	-0.186946	3.43e-05
hsa_mir_1247	GCM1	-0.187715	3.18e-05
hsa_mir_503	PI4K2B	-0.188889	2.83e-05
hsa_mir_503	CRK	-0.190106	2.51e-05
hsa_mir_1247	KIAA0895L	-0.191027	2.28e-05
hsa_mir_503	CA8	-0.19143	2.19e-05
hsa_mir_503	RIF1	-0.192082	2.05e-05
hsa_mir_503	SALL1	-0.192213	2.03e-05
hsa_mir_503	ZNF611	-0.193146	1.84e-05
hsa_mir_1247	UQCR11	-0.194515	1.6e-05
hsa_mir_503	GXYLT2	-0.194625	1.59e-05
hsa_mir_503	ZNF106	-0.194641	1.58e-05
hsa_mir_503	TRAK1	-0.196725	1.28e-05
hsa_mir_503	ATF6	-0.196771	1.27e-05
hsa_mir_503	PARP11	-0.197041	1.24e-05
hsa_mir_503	SIAE	-0.197829	1.14e-05
hsa_mir_503	SCD5	-0.198926	1.02e-05
hsa_mir_503	PRKAR2A	-0.199756	9.31e-06
hsa_mir_503	SFT2D2	-0.202147	7.23e-06
hsa_mir_503	MPL	-0.205413	5.1e-06
hsa_mir_503	ARPIN	-0.205539	5.03e-06
hsa_mir_503	LDLR	-0.205669	4.96e-06
hsa_mir_1247	EPOR	-0.20608	4.74e-06
hsa_mir_503	RBM43	-0.206474	4.54e-06
hsa_mir_503	CRISPLD2	-0.206507	4.53e-06
hsa_mir_503	GNPTAB	-0.209965	3.1e-06
hsa_mir_503	LYVE1	-0.210495	2.92e-06
hsa_mir_503	ZMAT3	-0.210798	2.83e-06
hsa_mir_503	USP53	-0.211741	2.54e-06
hsa_mir_503	HSD17B13	-0.212238	2.41e-06
hsa_mir_503	KIAA1671	-0.213676	2.05e-06
hsa_mir_503	MT1E	-0.214484	1.87e-06
hsa_mir_503	BCL2	-0.21481	1.8e-06
hsa_mir_503	PAPOLG	-0.215159	1.73e-06
hsa_mir_503	RAPH1	-0.215232	1.72e-06
hsa_mir_503	TIFA	-0.216866	1.43e-06
hsa_mir_503	RC3H1	-0.221364	8.49e-07
hsa_mir_503	TMEM106B	-0.221603	8.26e-07
hsa_mir_503	TMEM170A	-0.222661	7.3e-07
hsa_mir_503	TRAF6	-0.22485	5.64e-07
hsa_mir_503	CCSER2	-0.226502	4.63e-07
hsa_mir_503	S100A16	-0.227518	4.1e-07
hsa_mir_1247	DENND6B	-0.231679	2.48e-07
hsa_mir_503	TOR1AIP1	-0.232462	2.25e-07
hsa_mir_503	CYBRD1	-0.23278	2.16e-07
hsa_mir_503	GPR75	-0.233505	1.98e-07
hsa_mir_503	PLAG1	-0.233809	1.91e-07
hsa_mir_503	KPNA3	-0.23446	1.76e-07
hsa_mir_503	KIAA1614	-0.234823	1.68e-07
hsa_mir_503	STK17B	-0.239642	9.19e-08
hsa_mir_503	PLEKHA1	-0.242395	6.47e-08
hsa_mir_503	ARHGEF19	-0.243502	5.61e-08
hsa_mir_503	FRK	-0.245284	4.46e-08
hsa_mir_503	CPM	-0.247935	3.15e-08
hsa_mir_503	REL	-0.24857	2.9e-08
hsa_mir_503	TLL1	-0.248644	2.87e-08
hsa_mir_503	FOSL2	-0.249732	2.49e-08
hsa_mir_503	VSTM4	-0.250737	2.18e-08
hsa_mir_503	KIAA0513	-0.25303	1.6e-08
hsa_mir_503	TEAD1	-0.253261	1.55e-08
hsa_mir_503	SPRED1	-0.25457	1.3e-08
hsa_mir_503	RIMS3	-0.254914	1.24e-08
hsa_mir_503	MTMR10	-0.254974	1.23e-08
hsa_mir_503	CREBRF	-0.25505	1.22e-08
hsa_mir_503	CCND2	-0.256029	1.07e-08
hsa_mir_503	ZDBF2	-0.256062	1.06e-08
hsa_mir_503	UGGT1	-0.257475	8.77e-09
hsa_mir_503	SFMBT2	-0.267402	2.19e-09
hsa_mir_503	C3	-0.268349	1.91e-09
hsa_mir_503	EXPH5	-0.268364	1.91e-09
hsa_mir_503	SPTLC3	-0.270624	1.38e-09
hsa_mir_503	SOX9	-0.272066	1.12e-09
hsa_mir_503	KANK1	-0.275117	7.16e-10
hsa_mir_503	L1CAM	-0.278237	4.51e-10
hsa_mir_503	PIK3R1	-0.282735	2.29e-10
hsa_mir_503	SLC7A14	-0.288231	9.86e-11
hsa_mir_503	CYP20A1	-0.288645	9.25e-11
hsa_mir_503	CD40	-0.293459	4.35e-11
hsa_mir_503	NNT	-0.297524	2.27e-11
hsa_mir_503	FGF2	-0.298853	1.83e-11
hsa_mir_503	PRSS21	-0.300712	1.36e-11
hsa_mir_503	TRPM6	-0.305087	6.61e-12
hsa_mir_503	SOD2	-0.305666	6e-12
hsa_mir_503	DUSP19	-0.317988	7.4e-13
hsa_mir_503	TG	-0.322132	3.58e-13
hsa_mir_503	SLC2A5	-0.3238	2.66e-13
hsa_mir_503	ITGA2	-0.329703	9.22e-14
hsa_mir_503	DSG3	-0.340347	1.29e-14
hsa_mir_503	PBX1	-0.342192	9.06e-15

## Sheet: positive
miRNA	GeneSymbol	cor(pearson)	pvalue
hsa_mir_1247	GXYLT2	0.483118	9.9e-30
hsa_mir_1247	C3	0.468851	7.09e-28
hsa_mir_1247	VCAM1	0.464002	2.89e-27
hsa_mir_1247	KPNA3	0.453479	5.67e-26
hsa_mir_1247	NNT	0.451796	9.04e-26
hsa_mir_1247	FGF2	0.449772	1.58e-25
hsa_mir_1247	PRICKLE1	0.438833	3.01e-24
hsa_mir_1247	VSTM4	0.438484	3.3e-24
hsa_mir_1247	SOD2	0.437756	4.01e-24
hsa_mir_1247	FOSL2	0.435787	6.72e-24
hsa_mir_1247	ITGA2	0.431232	2.2e-23
hsa_mir_1247	SPRED1	0.431179	2.23e-23
hsa_mir_1247	TEAD1	0.429566	3.37e-23
hsa_mir_1247	REL	0.429542	3.4e-23
hsa_mir_1247	PBX1	0.428941	3.96e-23
hsa_mir_1247	ZNF106	0.420803	3.1e-22
hsa_mir_1247	FRK	0.419302	4.5e-22
hsa_mir_1247	KIAA1614	0.418541	5.43e-22
hsa_mir_1247	SOCS5	0.414242	1.56e-21
hsa_mir_1247	CREBRF	0.413714	1.78e-21
hsa_mir_1247	IL10	0.413628	1.81e-21
hsa_mir_1247	B4GALT5	0.413242	1.99e-21
hsa_mir_1247	LYZ	0.412616	2.32e-21
hsa_mir_1247	SLC2A3	0.411716	2.88e-21
hsa_mir_1247	SALL1	0.408778	5.85e-21
hsa_mir_1247	SERTAD2	0.407994	7.06e-21
hsa_mir_1247	EGR3	0.407564	7.82e-21
hsa_mir_1247	CCSER2	0.404132	1.76e-20
hsa_mir_1247	SMAD7	0.404028	1.81e-20
hsa_mir_1247	PIK3R1	0.400103	4.53e-20
hsa_mir_1247	CCND2	0.399533	5.17e-20
hsa_mir_1247	DUSP19	0.398053	7.28e-20
hsa_mir_1247	RIMS3	0.396865	9.58e-20
hsa_mir_1247	FNDC3B	0.396834	9.65e-20
hsa_mir_1247	CYBRD1	0.39577	1.23e-19
hsa_mir_1247	SFT2D2	0.394809	1.53e-19
hsa_mir_1247	SESTD1	0.39278	2.44e-19
hsa_mir_1247	KIAA1551	0.388254	6.74e-19
hsa_mir_1247	TLL1	0.388056	7.05e-19
hsa_mir_1247	MAP3K7	0.387936	7.24e-19
hsa_mir_1247	TRAF6	0.387787	7.48e-19
hsa_mir_1247	ZMAT3	0.385538	1.23e-18
hsa_mir_1247	STK17B	0.384868	1.43e-18
hsa_mir_1247	DDX3X	0.384762	1.46e-18
hsa_mir_1247	ELMSAN1	0.379944	4.2e-18
hsa_mir_1247	RIF1	0.378615	5.6e-18
hsa_mir_1247	RC3H1	0.375583	1.08e-17
hsa_mir_1247	USP53	0.374889	1.25e-17
hsa_mir_1247	PLEKHA1	0.373537	1.66e-17
hsa_mir_1247	ZNF805	0.371806	2.4e-17
hsa_mir_1247	ZDBF2	0.371711	2.45e-17
hsa_mir_1247	CAPZA2	0.371697	2.45e-17
hsa_mir_1247	SINHCAF	0.369578	3.83e-17
hsa_mir_1247	ATF6	0.369372	4e-17
hsa_mir_1247	TMEM106B	0.369107	4.23e-17
hsa_mir_1247	TOR1AIP1	0.365729	8.53e-17
hsa_mir_1247	PLEKHG2	0.36558	8.79e-17
hsa_mir_1247	PRKAR2A	0.364509	1.1e-16
hsa_mir_1247	IREB2	0.363064	1.48e-16
hsa_mir_1247	MTMR10	0.362654	1.6e-16
hsa_mir_1247	PAPOLG	0.362516	1.65e-16
hsa_mir_1247	AQR	0.360874	2.31e-16
hsa_mir_1247	UGGT1	0.360421	2.53e-16
hsa_mir_1247	ZNF704	0.360154	2.67e-16
hsa_mir_1247	IGF2R	0.360024	2.74e-16
hsa_mir_1247	ZNRF3	0.359528	3.03e-16
hsa_mir_1247	SLC24A4	0.359172	3.25e-16
hsa_mir_1247	BNIP2	0.35813	4.01e-16
hsa_mir_1247	FOXK1	0.356978	5.06e-16
hsa_mir_1247	GPR75	0.356693	5.36e-16
hsa_mir_1247	RAPH1	0.355895	6.28e-16
hsa_mir_1247	RBM43	0.355185	7.24e-16
hsa_mir_1247	DCP1A	0.354459	8.36e-16
hsa_mir_1247	KIAA1671	0.354452	8.37e-16
hsa_mir_1247	SOX9	0.353944	9.26e-16
hsa_mir_1247	ASH1L	0.353186	1.08e-15
hsa_mir_1247	PLPP3	0.352384	1.26e-15
hsa_mir_1247	AGO1	0.352142	1.32e-15
hsa_mir_1247	TIGAR	0.351215	1.59e-15
hsa_mir_1247	SPTLC3	0.35095	1.67e-15
hsa_mir_1247	CHMP1B	0.350267	1.91e-15
hsa_mir_1247	LAX1	0.350238	1.92e-15
hsa_mir_1247	SMC5	0.349924	2.04e-15
hsa_mir_1247	CD40	0.3497	2.13e-15
hsa_mir_1247	SBNO1	0.349472	2.23e-15
hsa_mir_1247	SMAD2	0.349455	2.24e-15
hsa_mir_1247	CERK	0.34838	2.76e-15
hsa_mir_1247	NRBF2	0.34791	3.02e-15
hsa_mir_1247	ZNF843	0.347667	3.17e-15
hsa_mir_1247	ZNF611	0.346863	3.7e-15
hsa_mir_1247	FGFR1	0.346018	4.36e-15
hsa_mir_1247	BTLA	0.344455	5.88e-15
hsa_mir_1247	TAOK1	0.343948	6.48e-15
hsa_mir_1247	TRAPPC10	0.343939	6.49e-15
hsa_mir_1247	PURB	0.342849	8e-15
hsa_mir_1247	LYVE1	0.339935	1.39e-14
hsa_mir_1247	BPTF	0.337766	2.09e-14
hsa_mir_1247	BTN3A3	0.337432	2.22e-14
hsa_mir_1247	CDK12	0.335448	3.21e-14
hsa_mir_1247	SELPLG	0.332944	5.1e-14
hsa_mir_1247	UBR3	0.332914	5.13e-14
hsa_mir_1247	SPPL2A	0.331453	6.7e-14
hsa_mir_1247	KIAA0513	0.331236	6.98e-14
hsa_mir_1247	NCKAP1	0.329918	8.87e-14
hsa_mir_1247	KIAA0408	0.32973	9.18e-14
hsa_mir_1247	ZNF573	0.32884	1.08e-13
hsa_mir_1247	IFNAR1	0.328757	1.09e-13
hsa_mir_1247	STK38	0.327636	1.34e-13
hsa_mir_1247	WEE1	0.325675	1.91e-13
hsa_mir_1247	TMEM170A	0.325103	2.11e-13
hsa_mir_1247	LIMS1	0.324313	2.43e-13
hsa_mir_1247	KANK1	0.323717	2.7e-13
hsa_mir_1247	SLC26A2	0.323071	3.03e-13
hsa_mir_1247	TRAK1	0.323056	3.04e-13
hsa_mir_1247	KCTD20	0.322785	3.19e-13
hsa_mir_1247	KIF5B	0.321282	4.16e-13
hsa_mir_1247	NUFIP2	0.320067	5.15e-13
hsa_mir_1247	CCNT1	0.318873	6.34e-13
hsa_mir_1247	N4BP1	0.318744	6.49e-13
hsa_mir_1247	FBXW7	0.318731	6.5e-13
hsa_mir_1247	PARP11	0.317821	7.62e-13
hsa_mir_1247	DR1	0.317279	8.37e-13
hsa_mir_1247	USP1	0.317184	8.51e-13
hsa_mir_1247	CRISPLD2	0.316383	9.77e-13
hsa_mir_1247	UHMK1	0.316344	9.84e-13
hsa_mir_1247	ANKRD40	0.315793	1.08e-12
hsa_mir_1247	CA8	0.315401	1.16e-12
hsa_mir_1247	NOM1	0.315156	1.21e-12
hsa_mir_1247	SLC2A5	0.314977	1.25e-12
hsa_mir_1247	ACTR2	0.314835	1.28e-12
hsa_mir_1247	ZMYM1	0.314608	1.33e-12
hsa_mir_1247	JARID2	0.314536	1.34e-12
hsa_mir_1247	TERF2	0.314351	1.39e-12
hsa_mir_1247	CSNK1G3	0.314015	1.47e-12
hsa_mir_1247	TFDP2	0.313717	1.55e-12
hsa_mir_1247	LURAP1L	0.313234	1.68e-12
hsa_mir_1247	ATXN1	0.312815	1.8e-12
hsa_mir_1247	DCAF10	0.311956	2.09e-12
hsa_mir_1247	PI4K2B	0.311945	2.09e-12
hsa_mir_1247	MSX2	0.311548	2.24e-12
hsa_mir_1247	SSBP2	0.311547	2.24e-12
hsa_mir_1247	SEC24A	0.311526	2.25e-12
hsa_mir_1247	SOCS1	0.311005	2.45e-12
hsa_mir_1247	CDC42SE2	0.310895	2.5e-12
hsa_mir_1247	SF3B3	0.309948	2.93e-12
hsa_mir_1247	PPIP5K2	0.308719	3.61e-12
hsa_mir_1247	LIX1L	0.307192	4.66e-12
hsa_mir_1247	EXPH5	0.305459	6.21e-12
hsa_mir_1247	AP2B1	0.30533	6.35e-12
hsa_mir_1247	CAND1	0.305283	6.4e-12
hsa_mir_1247	KLHL15	0.304224	7.62e-12
hsa_mir_1247	AKT3	0.304007	7.9e-12
hsa_mir_1247	MYO5A	0.303894	8.05e-12
hsa_mir_1247	CYP20A1	0.30348	8.62e-12
hsa_mir_1247	WAC	0.303236	8.97e-12
hsa_mir_1247	S100A16	0.30304	9.26e-12
hsa_mir_1247	SCD5	0.302617	9.93e-12
hsa_mir_1247	CCDC117	0.302502	1.01e-11
hsa_mir_1247	TSC22D2	0.301854	1.13e-11
hsa_mir_1247	SKI	0.301334	1.23e-11
hsa_mir_1247	SNTB2	0.301142	1.26e-11
hsa_mir_1247	B3GALNT2	0.300944	1.31e-11
hsa_mir_1247	L1CAM	0.300547	1.39e-11
hsa_mir_1247	ZNF620	0.300346	1.44e-11
hsa_mir_1247	RBBP8	0.298158	2.05e-11
hsa_mir_1247	EVI5	0.297747	2.19e-11
hsa_mir_1247	LANCL1	0.296748	2.57e-11
hsa_mir_1247	DNTTIP2	0.293675	4.2e-11
hsa_mir_1247	INO80	0.293522	4.3e-11
hsa_mir_1247	BZW1	0.293462	4.34e-11
hsa_mir_1247	FAM212B	0.293211	4.52e-11
hsa_mir_1247	MTPN	0.292883	4.76e-11
hsa_mir_1247	MOB4	0.292651	4.94e-11
hsa_mir_1247	SERBP1	0.292613	4.97e-11
hsa_mir_1247	TCF20	0.291876	5.58e-11
hsa_mir_1247	CDC14A	0.291491	5.93e-11
hsa_mir_1247	ZNF70	0.291153	6.25e-11
hsa_mir_1247	TMEM245	0.290662	6.75e-11
hsa_mir_1247	TGS1	0.290185	7.28e-11
hsa_mir_1247	CLTC	0.289196	8.49e-11
hsa_mir_1247	SLC7A14	0.28874	9.11e-11
hsa_mir_1247	CYP26B1	0.288103	1.01e-10
hsa_mir_1247	FBXL18	0.287931	1.03e-10
hsa_mir_1247	ZNF35	0.287636	1.08e-10
hsa_mir_1247	MPL	0.287588	1.09e-10
hsa_mir_1247	HCFC2	0.287558	1.09e-10
hsa_mir_1247	MIGA1	0.287359	1.13e-10
hsa_mir_1247	PPP2R5C	0.287332	1.13e-10
hsa_mir_1247	CRK	0.286857	1.22e-10
hsa_mir_1247	ASCC1	0.286517	1.29e-10
hsa_mir_1247	TAF8	0.285202	1.57e-10
hsa_mir_1247	LRP10	0.284494	1.75e-10
hsa_mir_1247	LRRC58	0.282218	2.48e-10
hsa_mir_1247	TBCCD1	0.28221	2.48e-10
hsa_mir_1247	EXT1	0.281544	2.75e-10
hsa_mir_1247	SLC25A12	0.281071	2.95e-10
hsa_mir_1247	PDE12	0.280631	3.15e-10
hsa_mir_1247	CUL3	0.280479	3.22e-10
hsa_mir_1247	SFMBT2	0.278402	4.4e-10
hsa_mir_1247	BMPR1A	0.278233	4.51e-10
hsa_mir_1247	TNFRSF11A	0.277921	4.73e-10
hsa_mir_1247	RECK	0.277636	4.93e-10
hsa_mir_1247	ORC4	0.277636	4.93e-10
hsa_mir_1247	MARVELD2	0.277251	5.22e-10
hsa_mir_1247	ZNF451	0.277111	5.33e-10
hsa_mir_1247	YTHDC1	0.276896	5.51e-10
hsa_mir_1247	ULBP3	0.275739	6.53e-10
hsa_mir_1247	PLAG1	0.274922	7.37e-10
hsa_mir_1247	ARPIN	0.274749	7.56e-10
hsa_mir_1247	FANCM	0.273981	8.46e-10
hsa_mir_1247	GK5	0.272388	1.07e-09
hsa_mir_1247	VOPP1	0.270853	1.33e-09
hsa_mir_1247	SPI1	0.270755	1.35e-09
hsa_mir_1247	BCL2	0.269326	1.66e-09
hsa_mir_1247	CNNM4	0.268831	1.79e-09
hsa_mir_1247	IL2	0.268768	1.8e-09
hsa_mir_1247	ZNF264	0.268128	1.97e-09
hsa_mir_1247	TIFA	0.267611	2.13e-09
hsa_mir_1247	CD2AP	0.267196	2.26e-09
hsa_mir_1247	PPIL4	0.266003	2.67e-09
hsa_mir_1247	ATG12	0.265963	2.69e-09
hsa_mir_1247	MCM8	0.26543	2.9e-09
hsa_mir_1247	ZBTB44	0.264427	3.34e-09
hsa_mir_503	BIRC5	0.263852	3.62e-09
hsa_mir_1247	TXNDC5	0.263077	4.04e-09
hsa_mir_1247	HOOK3	0.262138	4.6e-09
hsa_mir_1247	SIGLEC9	0.261081	5.33e-09
hsa_mir_1247	SOCS7	0.260892	5.48e-09
hsa_mir_1247	RALGAPB	0.260444	5.83e-09
hsa_mir_1247	USP48	0.260362	5.89e-09
hsa_mir_1247	DTX3L	0.260261	5.98e-09
hsa_mir_1247	ADH5	0.259154	6.96e-09
hsa_mir_1247	INTU	0.258967	7.15e-09
hsa_mir_1247	ZC3H11A	0.258896	7.22e-09
hsa_mir_1247	TG	0.258679	7.43e-09
hsa_mir_1247	IFITM1	0.257856	8.32e-09
hsa_mir_1247	GGCX	0.257212	9.09e-09
hsa_mir_1247	CEP104	0.256728	9.71e-09
hsa_mir_1247	CREBL2	0.25577	1.11e-08
hsa_mir_1247	SLC30A7	0.255689	1.12e-08
hsa_mir_1247	TXK	0.255506	1.15e-08
hsa_mir_1247	PSME3	0.254442	1.32e-08
hsa_mir_1247	PLEKHG5	0.25225	1.78e-08
hsa_mir_1247	BRD7	0.252013	1.84e-08
hsa_mir_1247	RNF115	0.251984	1.84e-08
hsa_mir_1247	CTSA	0.251732	1.91e-08
hsa_mir_1247	MAP3K9	0.250548	2.23e-08
hsa_mir_1247	ABHD17B	0.249971	2.41e-08
hsa_mir_1247	SLC25A32	0.249265	2.65e-08
hsa_mir_503	CBX2	0.249028	2.73e-08
hsa_mir_1247	FKTN	0.24847	2.94e-08
hsa_mir_1247	EIF4H	0.248392	2.97e-08
hsa_mir_1247	PEAK3	0.248323	3e-08
hsa_mir_1247	TRMT2B	0.248096	3.09e-08
hsa_mir_1247	DSG3	0.24758	3.3e-08
hsa_mir_1247	SF3B1	0.247579	3.3e-08
hsa_mir_1247	CASK	0.247458	3.36e-08
hsa_mir_1247	MMS22L	0.2474	3.38e-08
hsa_mir_1247	MTMR3	0.247366	3.4e-08
hsa_mir_1247	AVL9	0.247159	3.49e-08
hsa_mir_1247	TRPM6	0.246887	3.62e-08
hsa_mir_1247	CTDSPL	0.246444	3.83e-08
hsa_mir_1247	TCEANC2	0.246405	3.85e-08
hsa_mir_1247	CDC37L1	0.245455	4.36e-08
hsa_mir_1247	MINK1	0.24532	4.44e-08
hsa_mir_1247	GREM2	0.245308	4.44e-08
hsa_mir_1247	CCND3	0.244301	5.06e-08
hsa_mir_1247	DCAF17	0.244266	5.09e-08
hsa_mir_1247	NUCKS1	0.243978	5.28e-08
hsa_mir_1247	SLC30A5	0.243975	5.28e-08
hsa_mir_1247	CANX	0.243371	5.71e-08
hsa_mir_1247	SLC35F5	0.243123	5.89e-08
hsa_mir_1247	NWD1	0.242118	6.71e-08
hsa_mir_1247	CNNM3	0.241461	7.29e-08
hsa_mir_1247	BRAP	0.240769	7.97e-08
hsa_mir_1247	CYP51A1	0.240349	8.4e-08
hsa_mir_503	KIAA0895L	0.240178	8.59e-08
hsa_mir_1247	MIEF1	0.240083	8.69e-08
hsa_mir_1247	PLAA	0.239771	9.04e-08
hsa_mir_1247	IL10RB	0.238662	1.04e-07
hsa_mir_1247	DLST	0.238307	1.09e-07
hsa_mir_1247	ATP6V1B2	0.238278	1.09e-07
hsa_mir_1247	CACUL1	0.237931	1.14e-07
hsa_mir_1247	RPS6KA2	0.237827	1.16e-07
hsa_mir_1247	NMNAT1	0.236533	1.36e-07
hsa_mir_1247	CARD10	0.235877	1.48e-07
hsa_mir_1247	GRK3	0.235831	1.48e-07
hsa_mir_1247	DCTN5	0.235476	1.55e-07
hsa_mir_1247	IGF1R	0.235422	1.56e-07
hsa_mir_1247	GNPTAB	0.23525	1.6e-07
hsa_mir_1247	ACOT9	0.234595	1.73e-07
hsa_mir_1247	ORAI2	0.234404	1.77e-07
hsa_mir_1247	ZFHX4	0.234157	1.83e-07
hsa_mir_1247	ALG9	0.233564	1.97e-07
hsa_mir_1247	DDHD2	0.233241	2.05e-07
hsa_mir_1247	PRDM4	0.232927	2.13e-07
hsa_mir_1247	TMEM100	0.231799	2.44e-07
hsa_mir_1247	CRCP	0.231688	2.47e-07
hsa_mir_1247	OSCAR	0.231235	2.62e-07
hsa_mir_1247	SREK1	0.230559	2.84e-07
hsa_mir_1247	LARP1	0.230529	2.85e-07
hsa_mir_1247	E2F3	0.230461	2.87e-07
hsa_mir_1247	TRIM35	0.229995	3.04e-07
hsa_mir_1247	STX2	0.229657	3.17e-07
hsa_mir_1247	YY1	0.229206	3.35e-07
hsa_mir_1247	RAB3B	0.229072	3.4e-07
hsa_mir_1247	POU3F1	0.228392	3.69e-07
hsa_mir_1247	SEMA3E	0.228319	3.72e-07
hsa_mir_1247	NPR1	0.228175	3.79e-07
hsa_mir_1247	ACOX1	0.228135	3.81e-07
hsa_mir_1247	NUP50	0.227453	4.13e-07
hsa_mir_1247	MCF2L2	0.226787	4.48e-07
hsa_mir_1247	LDLR	0.224535	5.85e-07
hsa_mir_1247	UGGT2	0.224096	6.16e-07
hsa_mir_1247	NKD2	0.223991	6.24e-07
hsa_mir_1247	ZCCHC4	0.222298	7.62e-07
hsa_mir_503	LRFN1	0.222166	7.73e-07
hsa_mir_1247	FAM229B	0.221561	8.3e-07
hsa_mir_1247	ZFYVE9	0.221537	8.32e-07
hsa_mir_1247	CNNM2	0.220792	9.08e-07
hsa_mir_1247	PHKA1	0.220019	9.93e-07
hsa_mir_1247	RPS6KA3	0.219842	1.01e-06
hsa_mir_1247	GLP2R	0.219419	1.06e-06
hsa_mir_1247	CMTM4	0.219181	1.09e-06
hsa_mir_1247	TRIM72	0.217953	1.26e-06
hsa_mir_503	RNF222	0.217368	1.35e-06
hsa_mir_1247	GTPBP10	0.21729	1.36e-06
hsa_mir_1247	DNAJC10	0.215807	1.61e-06
hsa_mir_1247	UBN2	0.215432	1.68e-06
hsa_mir_1247	ZNF585B	0.215257	1.71e-06
hsa_mir_1247	TOMM20	0.215014	1.76e-06
hsa_mir_1247	CDKN1A	0.214707	1.82e-06
hsa_mir_1247	SBF1	0.214041	1.97e-06
hsa_mir_1247	RTN4	0.213702	2.04e-06
hsa_mir_1247	SETD1B	0.213076	2.19e-06
hsa_mir_1247	MESD	0.211583	2.59e-06
hsa_mir_1247	UBFD1	0.210424	2.95e-06
hsa_mir_1247	RFFL	0.210308	2.98e-06
hsa_mir_1247	NIF3L1	0.209624	3.22e-06
hsa_mir_1247	NAPG	0.209125	3.4e-06
hsa_mir_1247	SIAE	0.208526	3.63e-06
hsa_mir_1247	HSD17B12	0.208262	3.74e-06
hsa_mir_1247	SZRD1	0.207873	3.9e-06
hsa_mir_1247	ARHGEF19	0.207217	4.19e-06
hsa_mir_503	P2RY11	0.205966	4.8e-06
hsa_mir_1247	HNRNPK	0.205359	5.13e-06
hsa_mir_1247	SGPP2	0.204909	5.38e-06
hsa_mir_1247	FSCN1	0.204491	5.63e-06
hsa_mir_1247	SNAPC3	0.202966	6.63e-06
hsa_mir_1247	TNFRSF13C	0.20174	7.55e-06
hsa_mir_1247	SRGAP1	0.20051	8.6e-06
hsa_mir_1247	PTPRD	0.200404	8.7e-06
hsa_mir_1247	ITGAX	0.200076	9e-06
hsa_mir_1247	TFCP2	0.199458	9.61e-06
hsa_mir_1247	PIK3R4	0.198838	1.03e-05
hsa_mir_1247	THAP6	0.198818	1.03e-05
hsa_mir_1247	CDK17	0.197385	1.19e-05
hsa_mir_1247	COL1A1	0.196738	1.28e-05
hsa_mir_1247	CCDC36	0.196032	1.37e-05
hsa_mir_1247	ANK3	0.195862	1.4e-05
hsa_mir_1247	CRIPT	0.195631	1.43e-05
hsa_mir_1247	ZNF587	0.194986	1.53e-05
hsa_mir_1247	SVOP	0.194877	1.55e-05
hsa_mir_1247	C15orf38_AP3S2	0.194163	1.66e-05
hsa_mir_503	HJURP	0.192287	2.01e-05
hsa_mir_1247	ETFDH	0.190983	2.29e-05
hsa_mir_1247	PPP1R11	0.190472	2.41e-05
hsa_mir_1247	PPP6R1	0.189942	2.55e-05
hsa_mir_1247	SLC33A1	0.188869	2.83e-05
hsa_mir_1247	RFK	0.188428	2.96e-05
hsa_mir_1247	AP3S2	0.186782	3.48e-05
hsa_mir_1247	YWHAZ	0.184157	4.5e-05
hsa_mir_1247	ATAD5	0.183065	5e-05
hsa_mir_1247	MRPL10	0.181455	5.84e-05
hsa_mir_1247	HAUS3	0.180682	6.29e-05
hsa_mir_1247	HECTD3	0.180521	6.38e-05
hsa_mir_1247	L2HGDH	0.179789	6.84e-05
hsa_mir_503	CBARP	0.179145	7.27e-05
hsa_mir_1247	TP53	0.178613	7.65e-05
hsa_mir_503	CCDC83	0.178537	7.7e-05
hsa_mir_1247	CPM	0.17814	7.99e-05
hsa_mir_1247	MRPS14	0.177552	8.45e-05
hsa_mir_1247	PPM1A	0.177058	8.85e-05
hsa_mir_1247	ZNF91	0.176464	9.35e-05
hsa_mir_1247	CKAP4	0.174958	0.000107492
hsa_mir_503	LRWD1	0.17473	0.000109783
hsa_mir_1247	UTP11	0.17429	0.000114315
hsa_mir_1247	ZNF639	0.173771	0.000119892
hsa_mir_503	CBX4	0.172686	0.0001324
hsa_mir_1247	ZBTB34	0.172606	0.00013337
hsa_mir_1247	BPNT1	0.171467	0.000147909
hsa_mir_503	AKR1D1	0.169929	0.000169893
hsa_mir_1247	EFHD2	0.169427	0.00017771
hsa_mir_1247	SRPRA	0.16928	0.000180063
hsa_mir_503	BUB1	0.168804	0.000187889
hsa_mir_1247	SEC16A	0.168603	0.00019129
hsa_mir_1247	CLCN5	0.167931	0.000203067
hsa_mir_1247	LIPC	0.167898	0.000203666
hsa_mir_1247	NONO	0.167771	0.000205969
hsa_mir_1247	XKR7	0.167686	0.000207534
hsa_mir_1247	TESK2	0.167247	0.000215759
hsa_mir_1247	TXNDC15	0.167018	0.000220169
hsa_mir_1247	CDC14B	0.166992	0.000220674
hsa_mir_1247	TRIM59	0.166383	0.000232829
hsa_mir_1247	OCRL	0.16626	0.000235375
hsa_mir_503	NME2	0.166198	0.000236661
hsa_mir_1247	NPLOC4	0.165534	0.000250853
hsa_mir_1247	ZNRF2	0.16532	0.000255581
hsa_mir_1247	DNAL1	0.165316	0.000255683
hsa_mir_1247	TMEM184B	0.165039	0.000261945
hsa_mir_1247	HSPA8	0.164967	0.000263605
hsa_mir_1247	ADRA2B	0.164369	0.000277688
hsa_mir_503	MCM7	0.163963	0.000287672
hsa_mir_1247	BTD	0.163544	0.000298302
hsa_mir_1247	PNRC2	0.161911	0.000343385
hsa_mir_1247	ANK1	0.161407	0.000358526
hsa_mir_503	DECR1	0.160503	0.000387253
hsa_mir_1247	HMGB1	0.159745	0.000412984
hsa_mir_1247	PISD	0.159331	0.000427694
hsa_mir_1247	KCNE3	0.155644	0.000582025
hsa_mir_1247	TSPAN31	0.155439	0.000591993
hsa_mir_1247	SLX4	0.155394	0.000594182
hsa_mir_1247	TPCN2	0.152262	0.000767642
hsa_mir_1247	ZFP30	0.152193	0.000771947
hsa_mir_1247	TXNL1	0.152177	0.000772958
hsa_mir_503	PTGES2	0.151797	0.000797086
hsa_mir_1247	GPAT4	0.151775	0.000798499
hsa_mir_503	UQCR11	0.151124	0.000841496
hsa_mir_1247	ATXN3	0.151119	0.000841847
hsa_mir_1247	ATP5S	0.149845	0.000932337
hsa_mir_503	EPOR	0.149292	0.000974356
hsa_mir_1247	NT5DC3	0.148922	0.00100343
hsa_mir_1247	CHAC1	0.148818	0.00101173
hsa_mir_503	MRGBP	0.14858	0.00103104
hsa_mir_1247	YRDC	0.14852	0.00103593
hsa_mir_1247	TTC9C	0.148041	0.00107593
hsa_mir_503	DNAH17	0.146887	0.00117812
hsa_mir_1247	ZNF566	0.146825	0.00118385
hsa_mir_1247	HACD2	0.145861	0.00127652
hsa_mir_503	SDHAF1	0.144729	0.00139376
hsa_mir_503	RPL35A	0.144113	0.00146168
hsa_mir_1247	GATC	0.143936	0.00148166
hsa_mir_1247	PARD6B	0.143861	0.0014903
hsa_mir_503	SNRPD1	0.143104	0.00157943
hsa_mir_1247	PRPF4	0.142641	0.00163631
hsa_mir_1247	DVL3	0.142558	0.00164671
hsa_mir_1247	VBP1	0.141765	0.00174911
hsa_mir_503	SGO1	0.141729	0.00175393
hsa_mir_503	CCNE2	0.141261	0.00181724
hsa_mir_503	KIF23	0.140389	0.00194085
hsa_mir_1247	MYB	0.139915	0.00201134
hsa_mir_1247	C8orf37	0.139583	0.00206192
hsa_mir_1247	MAP4K2	0.139343	0.00209929
hsa_mir_503	ZNF419	0.138553	0.00222669
hsa_mir_1247	PDE4C	0.13844	0.00224551
hsa_mir_1247	RDH13	0.138235	0.00227999
hsa_mir_1247	CLN8	0.137831	0.00234933
hsa_mir_1247	DYNLL2	0.137243	0.0024536
hsa_mir_503	BCL2L12	0.136463	0.00259845
hsa_mir_1247	DCLRE1A	0.136149	0.0026589
hsa_mir_503	GCM1	0.135709	0.0027459
hsa_mir_503	COL1A1	0.135385	0.00281151
hsa_mir_503	DENND6B	0.135121	0.0028661
hsa_mir_1247	DHFR	0.134559	0.00298548
hsa_mir_503	RPL18A	0.13384	0.00314492
hsa_mir_503	KLC2	0.132786	0.00339251
hsa_mir_1247	GTF3C6	0.132707	0.00341168
hsa_mir_1247	ODF2L	0.129834	0.00418248
hsa_mir_503	NSD2	0.128594	0.0045616
hsa_mir_1247	TFAP2A	0.128436	0.00461214
hsa_mir_503	FANCA	0.128021	0.00474707
hsa_mir_503	QPCTL	0.126504	0.00527103
hsa_mir_1247	GABRR2	0.125359	0.00570032
hsa_mir_1247	DHODH	0.12422	0.00615855
hsa_mir_503	PMPCA	0.123439	0.00649157
hsa_mir_503	CENPI	0.123385	0.00651497
hsa_mir_1247	IRGQ	0.122106	0.00709712
hsa_mir_1247	TLK1	0.121302	0.00748639
hsa_mir_1247	EMILIN2	0.121042	0.0076163
hsa_mir_503	SNX22	0.120824	0.00772681
hsa_mir_1247	ZNF793	0.12034	0.00797768
hsa_mir_1247	ERAP2	0.119515	0.00842118
hsa_mir_503	CCNE1	0.119225	0.00858225
hsa_mir_1247	HSD17B13	0.118888	0.00877281
hsa_mir_503	MPLKIP	0.118427	0.00903966
hsa_mir_503	ANLN	0.117607	0.00953249
hsa_mir_503	NARF	0.11658	0.0101833
hsa_mir_503	HIST1H3H	0.115767	0.010726
hsa_mir_503	NUPL2	0.115719	0.0107583
hsa_mir_503	HSPE1_MOB4	0.115178	0.0111347
hsa_mir_1247	ZFP82	0.115137	0.0111636
hsa_mir_503	GNB2	0.11429	0.0117776
hsa_mir_1247	LIPH	0.112462	0.0132049
hsa_mir_503	RCC1L	0.112194	0.0134266
hsa_mir_503	PLCXD1	0.111505	0.014011
hsa_mir_503	GEMIN6	0.110123	0.0152522
hsa_mir_1247	PSMG2	0.109733	0.0156194
hsa_mir_503	ESCO2	0.107623	0.0177431
hsa_mir_1247	PRSS21	0.106865	0.0185662
hsa_mir_1247	PSMB2	0.106554	0.018913
hsa_mir_503	MRPL36	0.106503	0.0189702
hsa_mir_1247	SLC43A2	0.105028	0.0206989
hsa_mir_1247	FFAR2	0.10413	0.0218172
hsa_mir_1247	PIGW	0.103674	0.0224042
hsa_mir_503	AHSA1	0.102851	0.0234984
hsa_mir_503	IL4	0.102587	0.0238595
hsa_mir_503	PDCL3	0.102473	0.0240175
hsa_mir_1247	SCARF1	0.102107	0.0245282
hsa_mir_1247	WDR5B	0.101633	0.025204
hsa_mir_1247	RAB3IP	0.101258	0.0257511
hsa_mir_1247	CTSD	0.0996421	0.0282217
hsa_mir_1247	HDGF	0.0981995	0.0305976
hsa_mir_1247	TARS2	0.0964587	0.0336906
hsa_mir_503	ATP6V1B1	0.0962753	0.0340315
hsa_mir_1247	PRPS1	0.095022	0.0364405
hsa_mir_1247	UGT2B4	0.0930356	0.0405548
hsa_mir_503	GJA9	0.0924661	0.0418043
hsa_mir_503	ZNF367	0.0923669	0.0420253
hsa_mir_1247	CCDC127	0.0921755	0.0424545
hsa_mir_1247	ZNF622	0.0920419	0.042756
hsa_mir_1247	ESCO2	0.0919713	0.0429162
hsa_mir_1247	ATP6V0E1	0.0917097	0.0435141
hsa_mir_1247	HCAR1	0.0916133	0.0437362
hsa_mir_1247	IVD	0.0914322	0.044156
hsa_mir_1247	IKBKB	0.0911498	0.0448173
hsa_mir_1247	TMED4	0.0910168	0.0451318
hsa_mir_1247	CENPI	0.0903088	0.0468363
hsa_mir_1247	LHPP	0.0895508	0.0487211
hsa_mir_503	HPCAL1	0.0893912	0.049126

## Sheet: negative
miRNA	GeneSymbol	cor(pearson)	pvalue
hsa_mir_503	CDKN1A	-0.0891036	0.0498624
hsa_mir_503	PISD	-0.0893046	0.0493467
hsa_mir_503	DNTTIP2	-0.0896826	0.0483888
hsa_mir_503	MAP4K2	-0.0900778	0.0474042
hsa_mir_503	PTPRD	-0.0914756	0.0440551
hsa_mir_503	SMAD7	-0.0924683	0.0417994
hsa_mir_1247	RPL23	-0.0926153	0.0414739
hsa_mir_503	VEGFA	-0.092829	0.0410043
hsa_mir_503	GGCX	-0.0928958	0.0408585
hsa_mir_503	RFK	-0.0930842	0.0404496
hsa_mir_503	UBN2	-0.0934783	0.0396054
hsa_mir_503	UGGT2	-0.093853	0.0388164
hsa_mir_503	TSC22D2	-0.094413	0.0376624
hsa_mir_503	CMTM4	-0.094545	0.0373946
hsa_mir_503	CLTC	-0.094741	0.037
hsa_mir_503	PHKA1	-0.0952129	0.0360645
hsa_mir_503	NMNAT1	-0.0959433	0.0346561
hsa_mir_503	PPM1A	-0.0964128	0.0337755
hsa_mir_1247	RPL35A	-0.0967154	0.0332183
hsa_mir_503	MOB4	-0.0967285	0.0331944
hsa_mir_503	TSPAN31	-0.0970032	0.0326956
hsa_mir_503	TXNDC5	-0.0973769	0.0320275
hsa_mir_503	BZW1	-0.0974328	0.0319285
hsa_mir_503	ATP5S	-0.0978689	0.0311654
hsa_mir_503	PSME3	-0.0980384	0.0308732
hsa_mir_503	NR6A1	-0.0982396	0.0305293
hsa_mir_503	TBCCD1	-0.0987346	0.0296971
hsa_mir_1247	RNF222	-0.0991869	0.0289536
hsa_mir_503	PURB	-0.0992815	0.0288002
hsa_mir_503	DCTN5	-0.0998237	0.0279342
hsa_mir_1247	LRFN1	-0.100277	0.0272276
hsa_mir_503	CEP104	-0.100818	0.0264035
hsa_mir_503	SVOP	-0.101284	0.0257126
hsa_mir_503	THAP6	-0.101475	0.0254332
hsa_mir_503	MSX2	-0.101826	0.0249276
hsa_mir_503	LANCL1	-0.101893	0.0248308
hsa_mir_503	PRDM4	-0.102763	0.0236186
hsa_mir_503	ANK3	-0.103	0.0232979
hsa_mir_503	ATG12	-0.10314	0.0231097
hsa_mir_503	MCM8	-0.10326	0.0229492
hsa_mir_503	PARD6B	-0.103554	0.0225615
hsa_mir_503	UHMK1	-0.103716	0.0223493
hsa_mir_503	SLC33A1	-0.103834	0.0221958
hsa_mir_503	SLC2A3	-0.104158	0.0217804
hsa_mir_503	SLC30A5	-0.104719	0.021078
hsa_mir_503	LIMS1	-0.105199	0.0204911
hsa_mir_503	YTHDC1	-0.105667	0.0199337
hsa_mir_1247	LRWD1	-0.105692	0.0199043
hsa_mir_503	TGS1	-0.105715	0.0198776
hsa_mir_1247	B4GALT7	-0.107186	0.0182138
hsa_mir_503	DR1	-0.107243	0.018152
hsa_mir_503	PPP1R11	-0.107501	0.0178736
hsa_mir_503	TMEM245	-0.107517	0.0178572
hsa_mir_503	CSNK1G3	-0.107942	0.0174069
hsa_mir_503	PEAK3	-0.10834	0.0169953
hsa_mir_1247	GNB2	-0.10899	0.016341
hsa_mir_503	NPR1	-0.110312	0.0150772
hsa_mir_1247	SNX22	-0.11053	0.0148775
hsa_mir_503	LRRC58	-0.110716	0.0147082
hsa_mir_503	CUL3	-0.111375	0.0141237
hsa_mir_503	CHMP1B	-0.111729	0.0138188
hsa_mir_503	TCF20	-0.111762	0.0137908
hsa_mir_503	CDC14B	-0.111863	0.0137049
hsa_mir_503	ZNF35	-0.112816	0.0129169
hsa_mir_503	CAND1	-0.112848	0.0128915
hsa_mir_503	HNRNPA1L2	-0.113348	0.0124948
hsa_mir_503	DNAJC10	-0.114256	0.011803
hsa_mir_1247	HIST1H3H	-0.114357	0.011728
hsa_mir_503	ACTR2	-0.11456	0.0115786
hsa_mir_503	CASK	-0.11502	0.011247
hsa_mir_503	SREK1	-0.115398	0.0109805
hsa_mir_503	CYP51A1	-0.115424	0.0109623
hsa_mir_503	SLC24A4	-0.116041	0.0105401
hsa_mir_1247	BIRC5	-0.116101	0.0104999
hsa_mir_1247	RPL18A	-0.117234	0.00976437
hsa_mir_1247	DECR1	-0.118066	0.00925356
hsa_mir_1247	NME2	-0.118519	0.00898569
hsa_mir_503	TCEANC2	-0.118578	0.00895167
hsa_mir_503	PLEKHG2	-0.11863	0.00892107
hsa_mir_1247	BCL2L12	-0.118656	0.00890628
hsa_mir_503	VCAM1	-0.119272	0.00855579
hsa_mir_503	ZCCHC4	-0.11969	0.00832532
hsa_mir_503	PDE12	-0.11978	0.00827632
hsa_mir_503	DCAF10	-0.120006	0.00815475
hsa_mir_503	CRIPT	-0.120033	0.00813992
hsa_mir_503	RALGAPB	-0.120239	0.0080308
hsa_mir_1247	MRPL36	-0.120265	0.0080168
hsa_mir_503	BTD	-0.120407	0.00794234
hsa_mir_503	ASCC1	-0.120621	0.00783129
hsa_mir_503	PLEKHG5	-0.121266	0.00750443
hsa_mir_503	SLC35F5	-0.121552	0.00736358
hsa_mir_503	ACOT9	-0.121991	0.00715179
hsa_mir_503	ERAP2	-0.122767	0.00679061
hsa_mir_503	CDC37L1	-0.12285	0.00675312
hsa_mir_503	SEMA3E	-0.123062	0.00665778
hsa_mir_503	CYP26B1	-0.123094	0.00664367
hsa_mir_503	CNNM3	-0.123532	0.00645114
hsa_mir_1247	ATP6V1B1	-0.123781	0.00634357
hsa_mir_503	MMS22L	-0.123819	0.00632765
hsa_mir_503	CDC14A	-0.123933	0.0062792
hsa_mir_503	ADRA2B	-0.126011	0.00545209
hsa_mir_503	TXK	-0.12628	0.00535255
hsa_mir_503	STK38	-0.126995	0.00509589
hsa_mir_503	SRPRA	-0.127282	0.00499614
hsa_mir_503	WAC	-0.127507	0.00491904
hsa_mir_503	CACUL1	-0.127975	0.00476207
hsa_mir_503	USP1	-0.128299	0.00465622
hsa_mir_503	SEC24A	-0.128636	0.00454814
hsa_mir_503	CD2AP	-0.128816	0.0044915
hsa_mir_503	MINK1	-0.129888	0.0041669
hsa_mir_503	PPIL4	-0.130093	0.00410705
hsa_mir_503	TRAPPC10	-0.130101	0.00410485
hsa_mir_503	MYO5A	-0.130423	0.00401283
hsa_mir_503	ZBTB44	-0.130837	0.00389729
hsa_mir_503	FGFR1	-0.131015	0.00384836
hsa_mir_503	LHPP	-0.131112	0.00382211
hsa_mir_503	C15orf38_AP3S2	-0.131168	0.00380688
hsa_mir_503	CDNF	-0.131189	0.0038013
hsa_mir_503	CARD10	-0.131253	0.00378396
hsa_mir_503	ZNF620	-0.131256	0.00378312
hsa_mir_503	LRP10	-0.131557	0.00370326
hsa_mir_503	LYZ	-0.131686	0.00366953
hsa_mir_503	ANKRD40	-0.131868	0.00362212
hsa_mir_1247	FAM162A	-0.13245	0.00347487
hsa_mir_503	RAB3B	-0.134344	0.00303241
hsa_mir_1247	QPCTL	-0.134441	0.00301109
hsa_mir_503	AP2B1	-0.135314	0.0028261
hsa_mir_503	PPP2R5C	-0.135726	0.00274247
hsa_mir_503	TXNDC15	-0.135998	0.00268844
hsa_mir_503	NUFIP2	-0.136482	0.00259488
hsa_mir_503	RFFL	-0.137163	0.00246801
hsa_mir_503	TAOK1	-0.137815	0.00235195
hsa_mir_503	TRMT2B	-0.139025	0.00214977
hsa_mir_503	ZNF585B	-0.139303	0.00210565
hsa_mir_503	ZNF704	-0.13961	0.00205771
hsa_mir_503	MTMR3	-0.139647	0.00205211
hsa_mir_503	ALG9	-0.139883	0.00201617
hsa_mir_503	ZMYM1	-0.139965	0.00200376
hsa_mir_503	GRK3	-0.140256	0.00196038
hsa_mir_503	SLC30A7	-0.140305	0.00195321
hsa_mir_503	NAPG	-0.140965	0.00185834
hsa_mir_503	MAP3K7	-0.141205	0.00182497
hsa_mir_503	AKT3	-0.141479	0.00178753
hsa_mir_503	BPTF	-0.14255	0.00164772
hsa_mir_503	EVI5	-0.142622	0.00163869
hsa_mir_503	BTN3A3	-0.142816	0.00161458
hsa_mir_503	INO80	-0.143448	0.0015383
hsa_mir_503	LURAP1L	-0.14409	0.0014642
hsa_mir_503	LAX1	-0.144151	0.00145739
hsa_mir_503	CAPZA2	-0.144415	0.00142797
hsa_mir_503	TMEM100	-0.144846	0.00138119
hsa_mir_503	NCKAP1	-0.145215	0.00134224
hsa_mir_503	CCDC117	-0.145344	0.0013289
hsa_mir_503	INTU	-0.145446	0.00131841
hsa_mir_1247	AKR1D1	-0.145552	0.00130762
hsa_mir_503	KLHL15	-0.147035	0.00116455
hsa_mir_503	FBXW7	-0.14842	0.00104419
hsa_mir_503	IGF1R	-0.148502	0.00103738
hsa_mir_503	PPIP5K2	-0.148931	0.00100273
hsa_mir_503	SLC25A12	-0.148961	0.0010003
hsa_mir_1247	CCDC83	-0.149035	0.000994437
hsa_mir_503	FFAR2	-0.149258	0.000977013
hsa_mir_503	MARVELD2	-0.14985	0.000931941
hsa_mir_1247	IL4	-0.150678	0.000872177
hsa_mir_503	CCNT1	-0.151083	0.000844283
hsa_mir_503	RBBP8	-0.151137	0.000840637
hsa_mir_503	MYB	-0.151616	0.000808774
hsa_mir_503	BRAP	-0.151848	0.00079378
hsa_mir_503	NWD1	-0.151859	0.000793067
hsa_mir_503	BTLA	-0.151862	0.00079287
hsa_mir_1247	SDHAF1	-0.15196	0.000786667
hsa_mir_503	SF3B3	-0.15279	0.000735444
hsa_mir_503	CANX	-0.152892	0.000729407
hsa_mir_503	ZNF573	-0.15291	0.000728335
hsa_mir_503	SINHCAF	-0.152985	0.000723882
hsa_mir_503	TFDP2	-0.153325	0.000704131
hsa_mir_503	ZNF451	-0.154089	0.000661497
hsa_mir_503	PLPP3	-0.154446	0.000642425
hsa_mir_503	AP3S2	-0.154507	0.000639181
hsa_mir_503	SPPL2A	-0.154544	0.000637242
hsa_mir_1247	SLC29A2	-0.154959	0.000615876
hsa_mir_503	TRIM35	-0.15536	0.00059584
hsa_mir_503	DCP1A	-0.155692	0.000579748
hsa_mir_503	SESTD1	-0.15679	0.000529285
hsa_mir_503	CDK12	-0.158143	0.000472678
hsa_mir_1247	SPIRE2	-0.158235	0.000469054
hsa_mir_503	HCAR1	-0.158592	0.000455184
hsa_mir_503	MIGA1	-0.158617	0.000454243
hsa_mir_503	SBNO1	-0.159864	0.000408854
hsa_mir_503	ELMSAN1	-0.161323	0.000361114
hsa_mir_503	VOPP1	-0.161472	0.000356522
hsa_mir_503	BNIP2	-0.161472	0.000356517
hsa_mir_503	KIAA1551	-0.161558	0.000353924
hsa_mir_503	KIAA0408	-0.163185	0.000307699
hsa_mir_503	CREBL2	-0.164355	0.00027804
hsa_mir_503	XKR7	-0.164486	0.000274877
hsa_mir_1247	PTGES2	-0.164657	0.000270817
hsa_mir_503	BMPR1A	-0.165036	0.000262005
hsa_mir_503	CERK	-0.165547	0.00025057
hsa_mir_503	SERTAD2	-0.165586	0.000249702
hsa_mir_503	LIPH	-0.1659	0.000242936
hsa_mir_503	SMC5	-0.166711	0.000226214
hsa_mir_503	B3GALNT2	-0.167566	0.000209748
hsa_mir_503	ASH1L	-0.167798	0.000205483
hsa_mir_503	NT5DC3	-0.169138	0.00018237
hsa_mir_503	AGO1	-0.169661	0.000174038
hsa_mir_503	ZNF264	-0.170677	0.000158844
hsa_mir_503	IFNAR1	-0.170899	0.000155689
hsa_mir_503	IFITM1	-0.171137	0.000152378
hsa_mir_503	CDC42SE2	-0.17147	0.000147857
hsa_mir_503	TIGAR	-0.172241	0.000137872
hsa_mir_503	IGF2R	-0.172261	0.000137619
hsa_mir_503	SRGAP1	-0.172565	0.000133867
hsa_mir_1247	TUT1	-0.172644	0.000132904
hsa_mir_503	ZNRF3	-0.172653	0.0001328
hsa_mir_503	FAM212B	-0.173121	0.000127244
hsa_mir_503	B4GALT5	-0.173372	0.000124361
hsa_mir_503	TERF2	-0.173976	0.000117665
hsa_mir_503	SLC26A2	-0.17406	0.000116759
hsa_mir_503	SMAD2	-0.174663	0.000110456
hsa_mir_503	GK5	-0.175266	0.000104475
hsa_mir_503	IL10RB	-0.175317	0.000103991
hsa_mir_503	ACOX1	-0.175542	0.000101847
hsa_mir_503	MESD	-0.175625	0.00010107
hsa_mir_503	ZNF843	-0.176109	9.66e-05
hsa_mir_503	HCFC2	-0.176484	9.33e-05
hsa_mir_503	TNFRSF11A	-0.177079	8.83e-05
hsa_mir_503	UBR3	-0.177288	8.66e-05
hsa_mir_503	SNTB2	-0.178369	7.82e-05
hsa_mir_503	DDX3X	-0.178591	7.66e-05
hsa_mir_503	KIF5B	-0.178856	7.47e-05
hsa_mir_503	LIX1L	-0.178943	7.41e-05
hsa_mir_503	GREM2	-0.179579	6.98e-05
hsa_mir_503	SSBP2	-0.18056	6.36e-05
hsa_mir_503	TP53	-0.180757	6.24e-05
hsa_mir_503	ZNF805	-0.180878	6.17e-05
hsa_mir_503	ADH5	-0.180966	6.12e-05
hsa_mir_503	AQR	-0.18266	5.2e-05
hsa_mir_503	EGR3	-0.183372	4.86e-05
hsa_mir_503	SOCS5	-0.183386	4.85e-05
hsa_mir_503	IREB2	-0.18343	4.83e-05
hsa_mir_1247	P2RY11	-0.18406	4.54e-05
hsa_mir_503	EFHD2	-0.184544	4.34e-05
hsa_mir_503	N4BP1	-0.185178	4.08e-05
hsa_mir_503	ULBP3	-0.185704	3.87e-05
hsa_mir_503	FNDC3B	-0.18602	3.75e-05
hsa_mir_503	TAF8	-0.186506	3.58e-05
hsa_mir_503	NRBF2	-0.186544	3.57e-05
hsa_mir_503	PRICKLE1	-0.18668	3.52e-05
hsa_mir_503	ATXN1	-0.186685	3.52e-05
hsa_mir_503	CCND3	-0.186946	3.43e-05
hsa_mir_1247	GCM1	-0.187715	3.18e-05
hsa_mir_503	PI4K2B	-0.188889	2.83e-05
hsa_mir_503	CRK	-0.190106	2.51e-05
hsa_mir_1247	KIAA0895L	-0.191027	2.28e-05
hsa_mir_503	CA8	-0.19143	2.19e-05
hsa_mir_503	RIF1	-0.192082	2.05e-05
hsa_mir_503	SALL1	-0.192213	2.03e-05
hsa_mir_503	ZNF611	-0.193146	1.84e-05
hsa_mir_1247	UQCR11	-0.194515	1.6e-05
hsa_mir_503	GXYLT2	-0.194625	1.59e-05
hsa_mir_503	ZNF106	-0.194641	1.58e-05
hsa_mir_503	TRAK1	-0.196725	1.28e-05
hsa_mir_503	ATF6	-0.196771	1.27e-05
hsa_mir_503	PARP11	-0.197041	1.24e-05
hsa_mir_503	SIAE	-0.197829	1.14e-05
hsa_mir_503	SCD5	-0.198926	1.02e-05
hsa_mir_503	PRKAR2A	-0.199756	9.31e-06
hsa_mir_503	SFT2D2	-0.202147	7.23e-06
hsa_mir_503	MPL	-0.205413	5.1e-06
hsa_mir_503	ARPIN	-0.205539	5.03e-06
hsa_mir_503	LDLR	-0.205669	4.96e-06
hsa_mir_1247	EPOR	-0.20608	4.74e-06
hsa_mir_503	RBM43	-0.206474	4.54e-06
hsa_mir_503	CRISPLD2	-0.206507	4.53e-06
hsa_mir_503	GNPTAB	-0.209965	3.1e-06
hsa_mir_503	LYVE1	-0.210495	2.92e-06
hsa_mir_503	ZMAT3	-0.210798	2.83e-06
hsa_mir_503	USP53	-0.211741	2.54e-06
hsa_mir_503	HSD17B13	-0.212238	2.41e-06
hsa_mir_503	KIAA1671	-0.213676	2.05e-06
hsa_mir_503	MT1E	-0.214484	1.87e-06
hsa_mir_503	BCL2	-0.21481	1.8e-06
hsa_mir_503	PAPOLG	-0.215159	1.73e-06
hsa_mir_503	RAPH1	-0.215232	1.72e-06
hsa_mir_503	TIFA	-0.216866	1.43e-06
hsa_mir_503	RC3H1	-0.221364	8.49e-07
hsa_mir_503	TMEM106B	-0.221603	8.26e-07
hsa_mir_503	TMEM170A	-0.222661	7.3e-07
hsa_mir_503	TRAF6	-0.22485	5.64e-07
hsa_mir_503	CCSER2	-0.226502	4.63e-07
hsa_mir_503	S100A16	-0.227518	4.1e-07
hsa_mir_1247	DENND6B	-0.231679	2.48e-07
hsa_mir_503	TOR1AIP1	-0.232462	2.25e-07
hsa_mir_503	CYBRD1	-0.23278	2.16e-07
hsa_mir_503	GPR75	-0.233505	1.98e-07
hsa_mir_503	PLAG1	-0.233809	1.91e-07
hsa_mir_503	KPNA3	-0.23446	1.76e-07
hsa_mir_503	KIAA1614	-0.234823	1.68e-07
hsa_mir_503	STK17B	-0.239642	9.19e-08
hsa_mir_503	PLEKHA1	-0.242395	6.47e-08
hsa_mir_503	ARHGEF19	-0.243502	5.61e-08
hsa_mir_503	FRK	-0.245284	4.46e-08
hsa_mir_503	CPM	-0.247935	3.15e-08
hsa_mir_503	REL	-0.24857	2.9e-08
hsa_mir_503	TLL1	-0.248644	2.87e-08
hsa_mir_503	FOSL2	-0.249732	2.49e-08
hsa_mir_503	VSTM4	-0.250737	2.18e-08
hsa_mir_503	KIAA0513	-0.25303	1.6e-08
hsa_mir_503	TEAD1	-0.253261	1.55e-08
hsa_mir_503	SPRED1	-0.25457	1.3e-08
hsa_mir_503	RIMS3	-0.254914	1.24e-08
hsa_mir_503	MTMR10	-0.254974	1.23e-08
hsa_mir_503	CREBRF	-0.25505	1.22e-08
hsa_mir_503	CCND2	-0.256029	1.07e-08
hsa_mir_503	ZDBF2	-0.256062	1.06e-08
hsa_mir_503	UGGT1	-0.257475	8.77e-09
hsa_mir_503	SFMBT2	-0.267402	2.19e-09
hsa_mir_503	C3	-0.268349	1.91e-09
hsa_mir_503	EXPH5	-0.268364	1.91e-09
hsa_mir_503	SPTLC3	-0.270624	1.38e-09
hsa_mir_503	SOX9	-0.272066	1.12e-09
hsa_mir_503	KANK1	-0.275117	7.16e-10
hsa_mir_503	L1CAM	-0.278237	4.51e-10
hsa_mir_503	PIK3R1	-0.282735	2.29e-10
hsa_mir_503	SLC7A14	-0.288231	9.86e-11
hsa_mir_503	CYP20A1	-0.288645	9.25e-11
hsa_mir_503	CD40	-0.293459	4.35e-11
hsa_mir_503	NNT	-0.297524	2.27e-11
hsa_mir_503	FGF2	-0.298853	1.83e-11
hsa_mir_503	PRSS21	-0.300712	1.36e-11
hsa_mir_503	TRPM6	-0.305087	6.61e-12
hsa_mir_503	SOD2	-0.305666	6e-12
hsa_mir_503	DUSP19	-0.317988	7.4e-13
hsa_mir_503	TG	-0.322132	3.58e-13
hsa_mir_503	SLC2A5	-0.3238	2.66e-13
hsa_mir_503	ITGA2	-0.329703	9.22e-14
hsa_mir_503	DSG3	-0.340347	1.29e-14
hsa_mir_503	PBX1	-0.342192	9.06e-15
