# Supplementary material for: Crucial role of hsa-mir-503, hsa-mir-1247, and their validation in prostate cancer
Source: Aging (Albany NY). 2023 Nov 16;15(22):12966–81. doi: 10.18632/aging.205213 (PMC10713397; doi:10.18632/aging.205213)
Supplement: Supplementary Table 4 [file aging-15-205213-s004.xlsx]

## Sheet: Supplementary Table 4
Supplementary Table 4. Full sample information of data obtained from TCGA database.
submitter_id.samples	additional_pharmaceutical_therapy	additional_radiation_therapy	age_at_initial_pathologic_diagnosis	batch_number	bcr	bcr_followup_barcode	bcr_followup_uuid	submitter_id	biochemical_recurrence	bone_scan_results	clinical_M	clinical_T	day_of_dcc_upload	day_of_form_completion	days_to_bone_scan_performed	days_to_diagnostic_computed_tomography_performed	days_to_diagnostic_mri_performed	days_to_first_biochemical_recurrence	days_to_initial_pathologic_diagnosis	days_to_new_tumor_event_after_initial_treatment	days_to_psa	days_to_second_biochemical_recurrence	days_to_third_biochemical_recurrence	diagnostic_ct_abd_pelvis_performed	diagnostic_ct_abd_pelvis_result	diagnostic_mri_performed	file_uuid	followup_case_report_form_submission_reason	followup_treatment_success	gleason_score	histological_type_other	history_of_neoadjuvant_treatment	informed_consent_verified	initial_pathologic_diagnosis_method	laterality	lost_follow_up	lymphnodes_examined	month_of_dcc_upload	month_of_form_completion	new_neoplasm_event_occurrence_anatomic_site	new_neoplasm_event_type	new_neoplasm_occurrence_anatomic_site_text	new_tumor_event_after_initial_treatment	number_of_lymphnodes_examined	number_of_lymphnodes_positive_by_he	other_dx	pathologic_N	pathologic_T	patient_death_reason
TCGA-J9-A8CN-01A			53	357.55.0	Nationwide Children's Hospital			TCGA-J9-A8CN	NO		M0	T1c	22						0		963			NO		NO	3F2D2A35-FA51-4262-ACF4-030CB3F7BD58			6		No	YES	Core needle biopsy	Bilateral		NO	12								Yes, History of Prior Malignancy		T3a
TCGA-V1-A8MM-01A	NO	YES	60	389.51.0	Nationwide Children's Hospital	TCGA-V1-A8MM-F69416	B309B20B-78D8-4EEA-AF82-B78EA611F897	TCGA-V1-A8MM	YES		M0	T2b	22	9				990			990			NO		NO	617C74FF-CCFA-4B19-92AA-38C60D5427BE	Scheduled Follow-up Submission	Partial Remission/Response	7		No	YES	Core needle biopsy	Bilateral	NO	YES	12	1		Biochemical evidence of disease		YES	10	0	No	N0	T3a
TCGA-EJ-A46H-01A			60	285.66.0	Nationwide Children's Hospital	TCGA-EJ-A46H-F64713	3A0C7921-3A63-4F16-946C-34C90EEFB542	TCGA-EJ-A46H	NO	Normal (no evidence of prostate cancer) [cM0]	M0	T1c	22	10	-6				0		131						1B9226AF-E59C-4CC7-B018-2B2992C02C79	Scheduled Follow-up Submission	Complete Remission/Response	7		No	YES	Core needle biopsy	Bilateral	NO	YES	12	9				NO	6		No	N0	T2c
TCGA-HC-7078-01A			69	184.82.0	Nationwide Children's Hospital	TCGA-HC-7078-F47785	F203FC37-1D0A-4D4C-9572-C0E34E8C13BD	TCGA-HC-7078		Normal (no evidence of prostate cancer) [cM0]	M0	T1c	22	28					0		1409			NO	No Evidence of Extraprostatic Extension	NO	94558DAE-9D68-4437-8617-60C1EFF1BDAA	Scheduled Follow-up Submission	Complete Remission/Response	7		No	YES	Core needle biopsy	Bilateral	NO	YES	12	8				NO	3	0	No	N0	T3a
TCGA-VN-A88K-01A			58	357.55.0	Nationwide Children's Hospital	TCGA-VN-A88K-F62590	B3F4B606-68A9-4D0E-8928-AEBC54A82A82	TCGA-VN-A88K	NO	Equivocal	M0	T1c	22	22	24	24	-48		0		776			YES	No Evidence of Extraprostatic Extension	YES	C2C79C98-1A76-423F-9340-C82D39B045AC	Scheduled Follow-up Submission	Complete Remission/Response	8		No	YES	Core needle biopsy	Bilateral	YES	YES	12	12				NO	37	15	No	N1	T3a
TCGA-2A-A8VL-01A			51	389.51.0	Nationwide Children's Hospital	TCGA-2A-A8VL-F71759	6E1A6CED-30C0-4A4D-A550-82214C73826D	TCGA-2A-A8VL	NO	Normal (no evidence of prostate cancer) [cM0]	M0		22	31	21				0		585			NO		NO	7E2ED8FD-7842-4722-A070-37896CF6ABD5	Scheduled Follow-up Submission	Complete Remission/Response	6		No	YES	Core needle biopsy	Left	NO	YES	12	3				NO	15	0	No	N0	T2b
TCGA-HC-7821-01A	NO	NO	54	184.82.0	Nationwide Children's Hospital	TCGA-HC-7821-F66038	C48358EB-64C7-4A65-80B2-704EF4430A54	TCGA-HC-7821	NO		M0		22	1				950	0		236						C91CCE5C-9A46-4D44-83D0-0079CA2CF664	Scheduled Follow-up Submission	Progressive Disease	8		No	YES	Core needle biopsy	Bilateral	NO	YES	12	10		Biochemical evidence of disease		YES	7	2	Yes	N1	T3b
TCGA-J4-A67K-01A			68	312.65.0	Nationwide Children's Hospital	TCGA-J4-A67K-F63849	168BC06B-49EA-4E55-B90A-9AE194B4751B	TCGA-J4-A67K	NO		M0	T2b	22	20					0		557						6E1A01A3-BADF-49B0-BB0F-3A7A8F57D512	Scheduled Follow-up Submission		7		No	YES	Core needle biopsy	Bilateral	NO	NO	12	8				NO			No		T2c
TCGA-ZG-A9LN-01A			57	429.43.0	Nationwide Children's Hospital	TCGA-ZG-A9LN-F67937	8F010393-86FF-480A-9767-28FDC8B20E78	TCGA-ZG-A9LN	NO	Normal (no evidence of prostate cancer) [cM0]	M0	T1c	22	13	3	9	7		0		90			YES	No Evidence of Extraprostatic Extension	YES	A90EB1A7-EC78-4F3F-8306-E75058944FEF	Scheduled Follow-up Submission	Stable Disease	9		No	YES	Core needle biopsy	Bilateral	NO	YES	12	11				NO	10	6	No	N1	T3b
TCGA-M7-A721-01A			70	331.61.0	Nationwide Children's Hospital	TCGA-M7-A721-F61812	36307282-B9D2-4E36-96D7-F78B9BD174C0	TCGA-M7-A721	NO	Normal (no evidence of prostate cancer) [cM0]	M0	T1c	22	7	-8		-8		0		162			NO		YES	3D694E89-B0B3-4F5A-A855-BCD404BA2A34	Scheduled Follow-up Submission		7		No	YES	Core needle biopsy	Bilateral	YES	NO	12	7							No		T2c
TCGA-V1-A9OH-01A			63	429.43.0	Nationwide Children's Hospital	TCGA-V1-A9OH-F69402	F96DE106-B3FD-46A2-A166-6A2B66795520	TCGA-V1-A9OH	NO		M0	T1c	22	9							1253			NO		NO	B2106A58-7028-4242-8EC3-2D71FF6E2427	Scheduled Follow-up Submission		8		No	YES	Core needle biopsy	Right	NO	NO	12	1							No		T2b
TCGA-HC-A8D0-01A			61	370.53.0	Nationwide Children's Hospital	TCGA-HC-A8D0-F68682	E6F23D28-AA33-499E-8D23-9E3DD9DC0687	TCGA-HC-A8D0	NO	Normal (no evidence of prostate cancer) [cM0]	M0	T1c	22	10	11	11	14		0		110			YES	No Evidence of Extraprostatic Extension	YES	102A429F-D34E-43BF-B169-A79A80C9EA93	Scheduled Follow-up Submission	Complete Remission/Response	7		No	YES	Core needle biopsy	Left	NO	YES	12	12				NO	10	0	No	N0	T2a
TCGA-CH-5768-01A			72	91.78.0	Nationwide Children's Hospital	TCGA-CH-5768-F28998	d9b4ec26-42ca-4305-9906-1b29416d423c	TCGA-CH-5768	NO	Normal (no evidence of prostate cancer) [cM0]	M0		22	15	30	30			0		634			YES	No Evidence of Extraprostatic Extension	NO	7874749D-16DE-4D1E-8E52-F734E4B4EA97	Scheduled Follow-up Submission	Complete Remission/Response	6		No	YES	Core needle biopsy	Bilateral		YES	12	2				NO	16	0	No	N0	T3a
TCGA-CH-5768-11A			72	91.78.0	Nationwide Children's Hospital	TCGA-CH-5768-F28998	d9b4ec26-42ca-4305-9906-1b29416d423c	TCGA-CH-5768	NO	Normal (no evidence of prostate cancer) [cM0]	M0		22	15	30	30			0		634			YES	No Evidence of Extraprostatic Extension	NO	7874749D-16DE-4D1E-8E52-F734E4B4EA97	Scheduled Follow-up Submission	Complete Remission/Response	6		No	YES	Core needle biopsy	Bilateral		YES	12	2				NO	16	0	No	N0	T3a
TCGA-KK-A7B1-01A			65	331.61.0	Nationwide Children's Hospital	TCGA-KK-A7B1-F70517	566BA8ED-961C-4965-860E-E5DF35267E2F	TCGA-KK-A7B1	NO		M0	T1c	22	24			52		0		179			NO		YES	FE3FD0D2-7603-43CE-9881-0C7ED3352C67	Scheduled Follow-up Submission		7		No	YES	Core needle biopsy	Bilateral	NO	YES	12	2					21	0	No	N0	T3a
TCGA-KK-A7B1-11A			65	331.61.0	Nationwide Children's Hospital	TCGA-KK-A7B1-F70517	566BA8ED-961C-4965-860E-E5DF35267E2F	TCGA-KK-A7B1	NO		M0	T1c	22	24			52		0		179			NO		YES	FE3FD0D2-7603-43CE-9881-0C7ED3352C67	Scheduled Follow-up Submission		7		No	YES	Core needle biopsy	Bilateral	NO	YES	12	2					21	0	No	N0	T3a
TCGA-2A-A8VX-01A			70	389.51.0	Nationwide Children's Hospital	TCGA-2A-A8VX-F71804	24877403-12D1-40B7-8F7F-67714B8EAC8A	TCGA-2A-A8VX	NO	Normal (no evidence of prostate cancer) [cM0]	M0	T2c	22	31	32	32	89		0		1033			YES	Extraprostatic Extension Localized (e.g. seminal vesicles)	YES	04172A7C-2055-4D30-A222-7DBF32487EB6	Scheduled Follow-up Submission	Complete Remission/Response	8		No	YES	Core needle biopsy	Bilateral	NO	YES	12	3				NO	16	0	No	N0	T3b
TCGA-V1-A8MK-01A			41	370.53.0	Nationwide Children's Hospital	TCGA-V1-A8MK-F69460	3C918934-FBCB-4A6A-9A5B-91B5AD4E11E1	TCGA-V1-A8MK	YES		M0	T2a	22	9							-1			NO		NO	06EC9AB6-C87B-4F9A-9178-E284ADEA8122	Scheduled Follow-up Submission	Complete Remission/Response	6		No	YES	Core needle biopsy	Bilateral	NO	NO	12	1				NO			No	N0	T2c
TCGA-HC-A8D1-01A			68	370.53.0	Nationwide Children's Hospital	TCGA-HC-A8D1-F68683	E0E236CF-9CE8-4AF0-B32C-E790137659A9	TCGA-HC-A8D1	NO	Normal (no evidence of prostate cancer) [cM0]	M0	T2	22	10	14				0		168			NO		NO	41322EC0-2430-40D7-8FE4-C3D781B1471F	Scheduled Follow-up Submission	Complete Remission/Response	7		No	YES	Core needle biopsy	Bilateral	NO	YES	12	12				NO	6	0	No	N0	T2c
TCGA-KK-A7AY-01A			60	348.57.0	Nationwide Children's Hospital	TCGA-KK-A7AY-F70514	4C10A835-ABED-4297-911B-6A77AAF39835	TCGA-KK-A7AY	NO		M0	T2a	22	24					0		1572			NO		NO	8A297B87-4DA0-4143-BA3F-04DC27C0FAD4	Scheduled Follow-up Submission	Stable Disease	7		No	YES	Core needle biopsy	Bilateral	NO	YES	12	2				NO	8	0	No	N0	T2c
TCGA-KK-A7AY-11A			60	348.57.0	Nationwide Children's Hospital	TCGA-KK-A7AY-F70514	4C10A835-ABED-4297-911B-6A77AAF39835	TCGA-KK-A7AY	NO		M0	T2a	22	24					0		1572			NO		NO	8A297B87-4DA0-4143-BA3F-04DC27C0FAD4	Scheduled Follow-up Submission	Stable Disease	7		No	YES	Core needle biopsy	Bilateral	NO	YES	12	2				NO	8	0	No	N0	T2c
TCGA-KK-A8IJ-01A			59	357.55.0	Nationwide Children's Hospital			TCGA-KK-A8IJ	NO	Normal (no evidence of prostate cancer) [cM0]	M0	T3a	22		42	42			0		167			YES	No Evidence of Extraprostatic Extension	NO	540A35C2-869F-49E7-98FF-D05244097700			7		No	YES	Core needle biopsy	Bilateral		YES	12						34	1	No	N1	T3b
TCGA-KK-A8IJ-11A			59	357.55.0	Nationwide Children's Hospital			TCGA-KK-A8IJ	NO	Normal (no evidence of prostate cancer) [cM0]	M0	T3a	22		42	42			0		167			YES	No Evidence of Extraprostatic Extension	NO	540A35C2-869F-49E7-98FF-D05244097700			7		No	YES	Core needle biopsy	Bilateral		YES	12						34	1	No	N1	T3b
TCGA-KK-A8I4-01A	YES	NO	64	370.53.0	Nationwide Children's Hospital	TCGA-KK-A8I4-F70491	92F35EA3-EE5F-43AB-BF17-BD08D89E46DE	TCGA-KK-A8I4	NO	Normal (no evidence of prostate cancer) [cM0]	M0	T2c	22	24	70		70	2162	0	2162	1964			NO		YES	DA7131CA-1D3F-4534-93A5-31DCC9685C14	Scheduled Follow-up Submission		7		No	YES	Core needle biopsy	Left	NO	YES	12	2		Biochemical evidence of disease		YES	15	1	No	N1	T3b
TCGA-KK-A8I4-11A	YES	NO	64	370.53.0	Nationwide Children's Hospital	TCGA-KK-A8I4-F70491	92F35EA3-EE5F-43AB-BF17-BD08D89E46DE	TCGA-KK-A8I4	NO	Normal (no evidence of prostate cancer) [cM0]	M0	T2c	22	24	70		70	2162	0	2162	1964			NO		YES	DA7131CA-1D3F-4534-93A5-31DCC9685C14	Scheduled Follow-up Submission		7		No	YES	Core needle biopsy	Left	NO	YES	12	2		Biochemical evidence of disease		YES	15	1	No	N1	T3b
TCGA-X4-A8KS-01A			61	370.53.0	Nationwide Children's Hospital	TCGA-X4-A8KS-F67714	7D6D8ABD-6FA8-4512-8640-741D82FEA69F	TCGA-X4-A8KS	NO		M0	T2c	22	10					0		797			NO		NO	4F0DF459-B66B-4914-9325-A2EF5E77176E	Scheduled Follow-up Submission	Partial Remission/Response	7		No	YES	Core needle biopsy	Bilateral	NO	NO	12	11				NO			No		T2c
TCGA-YL-A9WX-01A			68	429.43.0	Nationwide Children's Hospital	TCGA-YL-A9WX-F58515	840FDC97-215B-429A-B3C5-C7EDF09233DF	TCGA-YL-A9WX	YES	Abnormal (not related to prostate cancer)	M0	T3a	22	12	34	37	41	1506	0	1506	1610			YES	No Evidence of Extraprostatic Extension	YES	1194797A-114A-4A56-9B91-BE81344A5A02	Additional New Tumor Event		9		No	YES	Core needle biopsy	Bilateral	NO	YES	12	4		Biochemical evidence of disease		YES	11	1	No	N1	T3b
TCGA-VP-A87C-01A			67	357.55.0	Nationwide Children's Hospital	TCGA-VP-A87C-F64470	3EDCD3C2-A6E2-4134-8AA1-E317D7DD44BF	TCGA-VP-A87C	NO	Normal (no evidence of prostate cancer) [cM0]	M0	T1c	22	3	14	14			0		1690			YES	No Evidence of Extraprostatic Extension	NO	7B507D8E-9A57-4973-8BD2-87E8D8C341AD	Scheduled Follow-up Submission	Complete Remission/Response	7		No	YES	Core needle biopsy	Bilateral	YES	YES	12	9				NO	12	0	No	N0	T2c
TCGA-J4-AATZ-01A			66	429.43.0	Nationwide Children's Hospital			TCGA-J4-AATZ	NO	Normal (no evidence of prostate cancer) [cM0]	M0		22		33	23	23		0		386				No Evidence of Extraprostatic Extension	YES	7062C4BE-59C0-4530-988C-6CB85BE6F40C			9		No	YES	Core needle biopsy	Bilateral		YES	12						4	0	No	N0	T3a
TCGA-YL-A8SO-01B			64	389.51.0	Nationwide Children's Hospital	TCGA-YL-A8SO-F67275	B828DAA8-ED44-4C24-8574-31B095BC0579	TCGA-YL-A8SO	NO		M0	T1a	22	3					0		3247						46ABD9FF-D72D-40BD-B3C0-B8B0192DBAE4	Scheduled Follow-up Submission	Stable Disease	9		No	YES	Transurethral resection (TURBT)	Bilateral	NO	NO	12	11				NO			No		T3a
TCGA-EJ-5505-01A			57	91.78.0	Nationwide Children's Hospital	TCGA-EJ-5505-F46206	7272BBED-E69B-42D3-852B-4AFC6879D750	TCGA-EJ-5505	NO	Normal (no evidence of prostate cancer) [cM0]	M0	T1c	22	3	12	12			0		448			YES	No Evidence of Extraprostatic Extension	NO	8374339D-2BD9-45EB-891E-22A44FBF4E46	Scheduled Follow-up Submission	Complete Remission/Response	7		No	YES	Core needle biopsy	Bilateral	NO	YES	12	8				NO	24	0	No	N0	T2c
TCGA-HC-7748-01A			60	184.82.0	Nationwide Children's Hospital	TCGA-HC-7748-F48774	162AB3A3-2F1B-4273-8602-F955C1C20DE2	TCGA-HC-7748					22	20					0		99						1FCB5FF3-B85E-40C1-B36D-6685C85584F1	Scheduled Follow-up Submission	Complete Remission/Response	6		No	YES	Core needle biopsy	Right	NO	YES	12	9				NO	10	0	Yes	N0	T2a
TCGA-Y6-A9XI-01A			72	429.43.0	Nationwide Children's Hospital	TCGA-Y6-A9XI-F68012	C0F9B2D2-8EC9-4958-B0D3-0D38D809ECB1	TCGA-Y6-A9XI	NO				22	1					0		519			NO		NO	B66079A4-243D-48B1-B31D-A003701F0B89	Scheduled Follow-up Submission	Complete Remission/Response	8		No	YES	Core needle biopsy	Bilateral	NO	YES	12	12				NO	4	0	No	N0
TCGA-HC-A6AQ-01A			60	312.65.0	Nationwide Children's Hospital			TCGA-HC-A6AQ		Normal (no evidence of prostate cancer) [cM0]	M0	T1c	22		15				0					NO		NO	5AA8377C-B63D-49A6-BDC8-FDEE27B0F16D			7		No	YES	Core needle biopsy	Bilateral		NO	12								Yes, History of Prior Malignancy		T2c
TCGA-KC-A7FA-01A			63	348.57.0	Nationwide Children's Hospital			TCGA-KC-A7FA	NO	Abnormal (not related to prostate cancer)	M0	T2c	22		70	62	40		0		161			YES	No Evidence of Extraprostatic Extension	YES	E2D51793-7396-4F0C-9D1A-78604A2721E0			7		No	YES	Core needle biopsy	Bilateral		YES	12						24	0	Yes, History of Prior Malignancy	N0	T3a
TCGA-EJ-A46I-01A			57	285.66.0	Nationwide Children's Hospital	TCGA-EJ-A46I-F64714	7F4368C5-C7FD-4D3E-A2CD-A3DCE94C3BA1	TCGA-EJ-A46I	NO		M0	T1c	22	10					0		484						D1975E29-35F0-4650-B5D7-8289B6A10E99	Scheduled Follow-up Submission	Complete Remission/Response	7		No	YES		Bilateral	NO		12	9				NO			No	N0	T3a
TCGA-HC-7736-01A			59	184.82.0	Nationwide Children's Hospital	TCGA-HC-7736-F60206	87B1374C-60AB-4E90-8459-BA9CD31933A4	TCGA-HC-7736			M0	T2b	22	31		-21			0		102			YES	No Evidence of Extraprostatic Extension		4DAD0FAC-60BE-4003-9192-C22BCACC3D4C	Scheduled Follow-up Submission	Complete Remission/Response	7		No	YES	Core needle biopsy	Bilateral	NO	YES	12	5				NO	13	0	No	N0	T2c
TCGA-J9-A52E-01A			65	285.66.0	Nationwide Children's Hospital			TCGA-J9-A52E	NO	Normal (no evidence of prostate cancer) [cM0]		T2c	22		15	12			0		393			YES	No Evidence of Extraprostatic Extension	NO	AF44754C-72AF-45AA-9079-1A983F9391D0			9		No	YES	Core needle biopsy	Bilateral		YES	12						8	0	No	N0	T3b
TCGA-ZG-A9NI-01A			73	429.43.0	Nationwide Children's Hospital	TCGA-ZG-A9NI-F67955	65DAC16B-6E8F-403E-AD0A-B25495667C02	TCGA-ZG-A9NI	NO	Normal (no evidence of prostate cancer) [cM0]	M0	T2a	22	13	22	22			0		99			YES	No Evidence of Extraprostatic Extension	NO	1E502349-3A6A-4AE6-BFAA-2BE2136DD5B0	Scheduled Follow-up Submission		9		No	YES	Core needle biopsy	Bilateral	NO	YES	12	11				NO	21	0	No	N0	T3b
TCGA-EJ-5530-01A			61	91.78.0	Nationwide Children's Hospital	TCGA-EJ-5530-F46774	4BAE98FC-3173-45D0-BF36-B6D4B6B72CB4	TCGA-EJ-5530	NO		M0	T2c	22	16					0		586			NO		NO	C13F453B-221B-408D-8242-A009E58C5A54	Scheduled Follow-up Submission	Complete Remission/Response	7		No	YES	Core needle biopsy	Bilateral	NO	YES	12	8				NO	6	0	No	N0	T2c
TCGA-G9-6385-01A			66	108.76.0	Nationwide Children's Hospital	TCGA-G9-6385-F40620	A665CB73-B662-4C74-9579-3066FAE1DE2E	TCGA-G9-6385	NO	Normal (no evidence of prostate cancer) [cM0]	M0	T1c	22	26	12				0		336			NO		NO	A20C96B8-1FB6-49DE-A6B5-81453D8735E5	Scheduled Follow-up Submission	Complete Remission/Response	7		No	YES	Core needle biopsy	Bilateral	NO	NO	12	2				NO			No		T2c
TCGA-G9-6385-11A			66	108.76.0	Nationwide Children's Hospital	TCGA-G9-6385-F40620	A665CB73-B662-4C74-9579-3066FAE1DE2E	TCGA-G9-6385	NO	Normal (no evidence of prostate cancer) [cM0]	M0	T1c	22	26	12				0		336			NO		NO	A20C96B8-1FB6-49DE-A6B5-81453D8735E5	Scheduled Follow-up Submission	Complete Remission/Response	7		No	YES	Core needle biopsy	Bilateral	NO	NO	12	2				NO			No		T2c
TCGA-EJ-7793-01A			49	221.78.0	Nationwide Children's Hospital	TCGA-EJ-7793-F48840	B5F8C34C-21C1-4F11-B79B-3E18C071EADB	TCGA-EJ-7793	NO		M0	T2c	22	23					0		114			NO		NO	37FDFD19-F5B7-4A3A-A2CB-79D6AD11DD34	Scheduled Follow-up Submission	Complete Remission/Response	7		No	YES	Core needle biopsy	Bilateral	YES	NO	12	9				NO			No		T2c
TCGA-EJ-7793-11A			49	221.78.0	Nationwide Children's Hospital	TCGA-EJ-7793-F48840	B5F8C34C-21C1-4F11-B79B-3E18C071EADB	TCGA-EJ-7793	NO		M0	T2c	22	23					0		114			NO		NO	37FDFD19-F5B7-4A3A-A2CB-79D6AD11DD34	Scheduled Follow-up Submission	Complete Remission/Response	7		No	YES	Core needle biopsy	Bilateral	YES	NO	12	9				NO			No		T2c
TCGA-EJ-7321-01A			57	221.78.0	Nationwide Children's Hospital	TCGA-EJ-7321-F64812	5F471506-F2C5-445C-ADBC-A0FE08A1CD4E	TCGA-EJ-7321	NO	Normal (no evidence of prostate cancer) [cM0]	M0	T1c	22	11	10				0		128			NO		NO	5EA34B86-B0B7-4405-B675-A8AB428B4A23	Scheduled Follow-up Submission	Complete Remission/Response	6		No	YES	Core needle biopsy	Bilateral	NO	YES	12	9				NO	25	0	No	N0	T3a
TCGA-EJ-7321-11A			57	221.78.0	Nationwide Children's Hospital	TCGA-EJ-7321-F64812	5F471506-F2C5-445C-ADBC-A0FE08A1CD4E	TCGA-EJ-7321	NO	Normal (no evidence of prostate cancer) [cM0]	M0	T1c	22	11	10				0		128			NO		NO	5EA34B86-B0B7-4405-B675-A8AB428B4A23	Scheduled Follow-up Submission	Complete Remission/Response	6		No	YES	Core needle biopsy	Bilateral	NO	YES	12	9				NO	25	0	No	N0	T3a
TCGA-J4-A67S-01A	NO	NO	63	312.65.0	Nationwide Children's Hospital	TCGA-J4-A67S-F63921	227F728C-3B7E-4BC5-BEC9-0103ED4CE237	TCGA-J4-A67S	NO		M0	T2b	22	21				708	0	708	522						10BBF6E0-9FCE-488F-AB5B-1712744F112D	Scheduled Follow-up Submission	Progressive Disease	7		No	YES	Core needle biopsy	Bilateral	NO	YES	12	8		Biochemical evidence of disease		YES	3	0	No	N0	T3a
TCGA-YL-A8HL-01A			58	370.53.0	Nationwide Children's Hospital	TCGA-YL-A8HL-F67258	BFA5692E-66B6-476C-B942-91D756F72D7E	TCGA-YL-A8HL	NO	Normal (no evidence of prostate cancer) [cM0]	M0		22	3	25	27			0		1173			YES	No Evidence of Extraprostatic Extension	NO	13A7EC57-4287-435F-BCC9-5E786DE9E882	Scheduled Follow-up Submission	Stable Disease	9		No	YES	Core needle biopsy	Bilateral	NO	YES	12	11				NO	8	2	No	N1	T3b
TCGA-H9-A6BX-01A			60	315.66.0	Nationwide Children's Hospital	TCGA-H9-A6BX-F63936	B9E0CB82-F51D-48AB-8D20-998701469506	TCGA-H9-A6BX	NO				22	21					0		570			NO		NO	7D9F7E9C-E9D3-4B33-B36B-27278B227DC8	Scheduled Follow-up Submission	Complete Remission/Response	6		No	YES		Bilateral	NO	NO	12	8				NO			No		T2c
TCGA-G9-6362-01A			57	108.76.0	Nationwide Children's Hospital	TCGA-G9-6362-F41012	014BFBBA-5BB0-4B05-9065-765C982720F7	TCGA-G9-6362	NO	Normal (no evidence of prostate cancer) [cM0]	M0	T1c	22	11	8				0		815			NO		NO	F1A29113-96A2-4C3E-8B07-07769B4C5D81	Scheduled Follow-up Submission	Complete Remission/Response	7		No	YES	Core needle biopsy	Bilateral	NO	YES	12	3				NO	2	0	No	N0	T3a
TCGA-G9-6362-11A			57	108.76.0	Nationwide Children's Hospital	TCGA-G9-6362-F41012	014BFBBA-5BB0-4B05-9065-765C982720F7	TCGA-G9-6362	NO	Normal (no evidence of prostate cancer) [cM0]	M0	T1c	22	11	8				0		815			NO		NO	F1A29113-96A2-4C3E-8B07-07769B4C5D81	Scheduled Follow-up Submission	Complete Remission/Response	7		No	YES	Core needle biopsy	Bilateral	NO	YES	12	3				NO	2	0	No	N0	T3a
TCGA-CH-5789-01A			61	91.78.0	Nationwide Children's Hospital	TCGA-CH-5789-F28990	09c13b77-ba94-46ea-8264-3d143668b694	TCGA-CH-5789	NO		M0		22	15		61			0		229			YES	No Evidence of Extraprostatic Extension		73BC99B1-4B49-4F8F-8E97-590C56DA0158	Scheduled Follow-up Submission	Complete Remission/Response	7		No	YES	Core needle biopsy	Bilateral			12	2				NO	4	0	No	N0	T3a
TCGA-KK-A59Z-01A			66	285.66.0	Nationwide Children's Hospital	TCGA-KK-A59Z-F70443	3436FD2B-856F-4F70-A9FA-64F4FB277571	TCGA-KK-A59Z	NO	Normal (no evidence of prostate cancer) [cM0]	M0	T2b	22	16	24	20			0		849			YES	No Evidence of Extraprostatic Extension	NO	C35253C1-A14C-4029-9CB1-B5199533297E	Scheduled Follow-up Submission		7		No	YES	Core needle biopsy	Bilateral	NO	YES	12	2					2	0	No	N0	T2c
TCGA-KK-A59Z-11A			66	285.66.0	Nationwide Children's Hospital	TCGA-KK-A59Z-F70443	3436FD2B-856F-4F70-A9FA-64F4FB277571	TCGA-KK-A59Z	NO	Normal (no evidence of prostate cancer) [cM0]	M0	T2b	22	16	24	20			0		849			YES	No Evidence of Extraprostatic Extension	NO	C35253C1-A14C-4029-9CB1-B5199533297E	Scheduled Follow-up Submission		7		No	YES	Core needle biopsy	Bilateral	NO	YES	12	2					2	0	No	N0	T2c
TCGA-KK-A8ID-01A			70	370.53.0	Nationwide Children's Hospital	TCGA-KK-A8ID-F70529	CE8C4902-7698-46C1-9A81-0B3E52FA9450	TCGA-KK-A8ID	NO	Normal (no evidence of prostate cancer) [cM0]	M0	T2b	22	24	43	-5			0		1924			YES	No Evidence of Extraprostatic Extension	NO	2ECF14AB-CE19-4457-AC11-575CBB10ACAD	Scheduled Follow-up Submission	Complete Remission/Response	9		No	YES	Core needle biopsy	Bilateral	NO	YES	12	2				NO	19	2	No	N1	T3b
TCGA-KK-A8ID-11A			70	370.53.0	Nationwide Children's Hospital	TCGA-KK-A8ID-F70529	CE8C4902-7698-46C1-9A81-0B3E52FA9450	TCGA-KK-A8ID	NO	Normal (no evidence of prostate cancer) [cM0]	M0	T2b	22	24	43	-5			0		1924			YES	No Evidence of Extraprostatic Extension	NO	2ECF14AB-CE19-4457-AC11-575CBB10ACAD	Scheduled Follow-up Submission	Complete Remission/Response	9		No	YES	Core needle biopsy	Bilateral	NO	YES	12	2				NO	19	2	No	N1	T3b
TCGA-G9-6378-01A			54	108.76.0	Nationwide Children's Hospital	TCGA-G9-6378-F40630	11731E67-30AF-4AAC-B067-D8FF24CB2B85	TCGA-G9-6378	NO	Normal (no evidence of prostate cancer) [cM0]	M0	T1c	22	26	-176	100			0		223			YES	No Evidence of Extraprostatic Extension	NO	8A48A5AF-07A0-4569-9B6F-8590D6A3EEAA	Scheduled Follow-up Submission	Complete Remission/Response	7		No	YES	Core needle biopsy	Bilateral	NO	NO	12	2				NO			No		T2c
TCGA-EJ-5524-01A	NO	YES	57	91.78.0	Nationwide Children's Hospital	TCGA-EJ-5524-F46760	1B239DDD-8DDD-4EBC-9231-16547F999E6B	TCGA-EJ-5524	NO		M0	T2b	22	16				1155	0	265	811			NO		NO	024111F6-F940-4B48-BC30-2322B64CC75C	Scheduled Follow-up Submission	Progressive Disease	9		No	YES	Core needle biopsy	Bilateral	NO	YES	12	8		Locoregional Recurrence		YES	17	0	No	N0	T3a
TCGA-HC-7231-01A			66	184.82.0	Nationwide Children's Hospital	TCGA-HC-7231-F63153	B9F49E25-073D-4B40-B9C5-626FEC611449	TCGA-HC-7231			M0	T1c	22	31					0								B78D8D95-E3BD-4555-A336-AB4EDA24B52C	Scheduled Follow-up Submission	Complete Remission/Response	7		No	YES	Core needle biopsy	Bilateral	NO	NO	12	7				NO			No		T2c
TCGA-HC-7213-01A	YES	YES	53	184.82.0	Nationwide Children's Hospital	TCGA-HC-7213-F66041	8D09FC3A-0EBD-484D-B1CF-6E69E1FA9ED8	TCGA-HC-7213	YES		M0	T3b	22	1		22	34	170	0	170	170			YES	No Evidence of Extraprostatic Extension	YES	DC8C50F7-2057-41FF-969F-5A2E6A5B6E2E	Scheduled Follow-up Submission	Complete Remission/Response	9		No	YES	Core needle biopsy	Bilateral	NO	YES	12	10		Biochemical evidence of disease		YES	4	0	No	N0	T3b
TCGA-KK-A8I8-01A			69	370.53.0	Nationwide Children's Hospital	TCGA-KK-A8I8-F70526	831FAE49-428C-4537-A768-7D764390E141	TCGA-KK-A8I8	NO		M0	T2a	22	24			31		0		757			NO		YES	46501048-D526-4FDE-B734-0D5A5E98BA9B	Scheduled Follow-up Submission	Complete Remission/Response	9		No	YES	Core needle biopsy	Bilateral	NO	YES	12	2				NO	27		No	N0	T3b
TCGA-KK-A8I8-11A			69	370.53.0	Nationwide Children's Hospital	TCGA-KK-A8I8-F70526	831FAE49-428C-4537-A768-7D764390E141	TCGA-KK-A8I8	NO		M0	T2a	22	24			31		0		757			NO		YES	46501048-D526-4FDE-B734-0D5A5E98BA9B	Scheduled Follow-up Submission	Complete Remission/Response	9		No	YES	Core needle biopsy	Bilateral	NO	YES	12	2				NO	27		No	N0	T3b
TCGA-CH-5754-01A			65	91.78.0	Nationwide Children's Hospital			TCGA-CH-5754	NO	Normal (no evidence of prostate cancer) [cM0]	M0		22		62	62			0		62			YES	No Evidence of Extraprostatic Extension	NO	3149A4D9-127F-497E-900C-E90EDB912804			9		No	YES	Core needle biopsy	Bilateral		YES	12						11	3	No	N1	T3b
TCGA-FC-A8O0-01A			68	389.51.0	Nationwide Children's Hospital	TCGA-FC-A8O0-F71394	9BA41D72-B0C2-4349-9179-1C27371D13C4	TCGA-FC-A8O0	NO		M0	T2c	22	25		10	-8		0		18			YES	Extraprostatic Extension Localized (e.g. seminal vesicles)	YES	68A350B2-A4DF-480D-A16F-F199FF58762C	Scheduled Follow-up Submission	Complete Remission/Response	6		No	YES	Core needle biopsy	Bilateral	NO	YES	12	3				NO	12	0	No	N0	T3a
TCGA-XJ-A9DQ-01A			48	389.51.0	Nationwide Children's Hospital	TCGA-XJ-A9DQ-F66562	53BD146F-D19C-450A-BD20-E2B3C0350605	TCGA-XJ-A9DQ	NO		M0	T1c	22	20					0					NO		NO	FE6C2087-D6FB-4EDB-AA19-0ECB6A531A8A	Scheduled Follow-up Submission		6		No	YES	Core needle biopsy	Right	YES	NO	12	10							No		T2a
TCGA-EJ-7797-01A			53	221.78.0	Nationwide Children's Hospital	TCGA-EJ-7797-F48954	F1261D85-CD97-4236-B131-24F7C04053BC	TCGA-EJ-7797	NO		M0	T1c	22	24					0		187			NO		NO	20B406F2-EF85-4DB4-B3C3-A821909B0EC4	Scheduled Follow-up Submission	Complete Remission/Response	7		No	YES	Core needle biopsy	Bilateral	NO	YES	12	9				NO	14	0	No	N0	T2c
TCGA-EJ-7797-11A			53	221.78.0	Nationwide Children's Hospital	TCGA-EJ-7797-F48954	F1261D85-CD97-4236-B131-24F7C04053BC	TCGA-EJ-7797	NO		M0	T1c	22	24					0		187			NO		NO	20B406F2-EF85-4DB4-B3C3-A821909B0EC4	Scheduled Follow-up Submission	Complete Remission/Response	7		No	YES	Core needle biopsy	Bilateral	NO	YES	12	9				NO	14	0	No	N0	T2c
TCGA-XA-A8JR-01A			68	370.53.0	Nationwide Children's Hospital	TCGA-XA-A8JR-F69794	6A7E9744-AE8B-4C3F-AA87-7424E6471010	TCGA-XA-A8JR	NO		M0		22	20					0		69						760C6351-8C18-46C8-85B1-308C394D2166	Scheduled Follow-up Submission		7		No	YES	Core needle biopsy	Bilateral	NO	YES	12	1				NO	7	0	No	N0	T2c
TCGA-EJ-5516-01A			49	91.78.0	Nationwide Children's Hospital	TCGA-EJ-5516-F46600	37B0F752-AEDC-4827-A399-535818181DD4	TCGA-EJ-5516	NO	Normal (no evidence of prostate cancer) [cM0]	M0	T2b	22	12	0				0		730			NO		NO	4D4E81E4-A5BF-42D1-AEB4-525F258FD9E4	Scheduled Follow-up Submission	Complete Remission/Response	7		No	YES	Core needle biopsy	Bilateral	NO	YES	12	8				NO	6	0	No	N0	T3a
TCGA-EJ-8469-01A	NO	NO	46	244.69.0	Nationwide Children's Hospital	TCGA-EJ-8469-F64636	CA9C15E6-F8A2-44DE-A458-86AA5CD6D1D8	TCGA-EJ-8469	YES		M0	T3a	22	8		30		1925	0	1925	1925			YES	No Evidence of Extraprostatic Extension		AA21A3D1-F46E-4078-A9DC-509644F21E2E	Scheduled Follow-up Submission	Partial Remission/Response	9		No	YES	Core needle biopsy	Bilateral	NO	YES	12	9		Locoregional Recurrence		YES	57	0	No	N0	T3a
TCGA-J9-A52B-01A			62	285.66.0	Nationwide Children's Hospital			TCGA-J9-A52B	NO	Normal (no evidence of prostate cancer) [cM0]		T3b	22		11	11			0		414			YES	No Evidence of Extraprostatic Extension	NO	4E59D4CA-964F-453F-8610-038DF8AE7C2F			9		No	YES	Core needle biopsy	Bilateral		YES	12						7	0	No	N0	T3b
TCGA-CH-5767-01A			66	108.76.0	Nationwide Children's Hospital	TCGA-CH-5767-F28999	3f4b8d5e-9c1d-4120-afe3-758234fbbc6b	TCGA-CH-5767	NO		M0		22	15					0		377			NO		NO	62B44FD0-AC8C-4A20-ACF3-D610C83155C8	Scheduled Follow-up Submission	Complete Remission/Response	7		No	YES	Core needle biopsy	Bilateral		YES	12	2				NO	19	0	No	N0	T2c
TCGA-CH-5767-11B			66	108.76.0	Nationwide Children's Hospital	TCGA-CH-5767-F28999	3f4b8d5e-9c1d-4120-afe3-758234fbbc6b	TCGA-CH-5767	NO		M0		22	15					0		377			NO		NO	62B44FD0-AC8C-4A20-ACF3-D610C83155C8	Scheduled Follow-up Submission	Complete Remission/Response	7		No	YES	Core needle biopsy	Bilateral		YES	12	2				NO	19	0	No	N0	T2c
TCGA-EJ-7331-01A			64	184.82.0	Nationwide Children's Hospital	TCGA-EJ-7331-F64813	A103623A-2875-4FD2-8094-98D5BDA2E839	TCGA-EJ-7331	YES		M0	T1c	22	11					0		189			NO		NO	8141E9A7-E156-4634-BB83-70304865084E	Scheduled Follow-up Submission	Complete Remission/Response	7		No	YES	Core needle biopsy	Bilateral	NO	YES	12	9				NO	7	0	No	N0	T2c
TCGA-EJ-7331-11A			64	184.82.0	Nationwide Children's Hospital	TCGA-EJ-7331-F64813	A103623A-2875-4FD2-8094-98D5BDA2E839	TCGA-EJ-7331	YES		M0	T1c	22	11					0		189			NO		NO	8141E9A7-E156-4634-BB83-70304865084E	Scheduled Follow-up Submission	Complete Remission/Response	7		No	YES	Core needle biopsy	Bilateral	NO	YES	12	9				NO	7	0	No	N0	T2c
TCGA-XK-AAK1-01A			62	429.43.0	Nationwide Children's Hospital	TCGA-XK-AAK1-F68316	570BB95B-20D9-4887-A12C-D927AF2BC008	TCGA-XK-AAK1	NO	Normal (no evidence of prostate cancer) [cM0]	M0	T1c	22	14	-2				0		614			NO		NO	005E4377-8851-40AE-88E7-1110B63369A3	Scheduled Follow-up Submission	Complete Remission/Response	7		No	YES	Core needle biopsy	Bilateral	NO	YES	12	11				NO	6	0	Yes, History of Prior Malignancy	N0	T2c
TCGA-EJ-AB20-01A			61	429.43.0	Nationwide Children's Hospital	TCGA-EJ-AB20-F64790	3A6CD429-B141-4F4E-82EE-B94DDE028D23	TCGA-EJ-AB20	NO		M0	T2c	22	11					0		131						439B7C57-403C-4DF0-8730-B2396972E12A	Scheduled Follow-up Submission	Complete Remission/Response	6		No	YES	Core needle biopsy	Bilateral	NO	YES	12	9				NO	18	0	No	N0	T2c
TCGA-HC-8213-01A			48	308.70.0	Nationwide Children's Hospital	TCGA-HC-8213-F45567	075F6840-7AF0-4012-B723-716F844610D3	TCGA-HC-8213					22	17					0								220684B3-BB2D-4294-B976-C38C03EA7286	Scheduled Follow-up Submission	Complete Remission/Response	6		No	YES		Bilateral	NO	NO	12	7				NO			No		T2c
TCGA-J4-A6G1-01A			68	315.66.0	Nationwide Children's Hospital	TCGA-J4-A6G1-F63926	8FE80B14-2912-4BB9-93C3-FB2108D447A3	TCGA-J4-A6G1	NO		M0	T2b	22	21			34		0		178					YES	46A6E44D-D5F4-4478-B5F0-DD675E77AF70	Scheduled Follow-up Submission	Complete Remission/Response	8		No	YES	Core needle biopsy	Bilateral	NO	YES	12	8				NO	2	0	No	N0	T3a
TCGA-G9-6336-01A			57	108.76.0	Nationwide Children's Hospital	TCGA-G9-6336-F40679	2036C9F0-F6CC-4100-8A36-EB50C7BCA09E	TCGA-G9-6336	NO	Normal (no evidence of prostate cancer) [cM0]	M0	T2c	22	26	98	104			0		1669			YES	No Evidence of Extraprostatic Extension	NO	ECC4F892-629B-4386-AE7D-ECE641D75BA5	Scheduled Follow-up Submission	Complete Remission/Response	7		No	YES	Core needle biopsy	Bilateral	NO	YES	12	2				NO	5	0	No	N0
TCGA-J4-A67Q-01A			77	312.65.0	Nationwide Children's Hospital	TCGA-J4-A67Q-F63912	C4BF3F6D-2BF0-4F6E-850A-5CF432BA7DFD	TCGA-J4-A67Q	NO		M0	T2b	22	21					0		616						A6A8BEDF-6ED3-4F19-B2D3-762B1016FEB8	Scheduled Follow-up Submission	Complete Remission/Response	6		No	YES	Core needle biopsy	Bilateral	NO	NO	12	8				NO			No		T2c
TCGA-ZG-A9LS-01A			64	429.43.0	Nationwide Children's Hospital	TCGA-ZG-A9LS-F67932	9897B163-9542-4DCD-A838-AA0FD0BD7567	TCGA-ZG-A9LS	NO	Normal (no evidence of prostate cancer) [cM0]	M0	T2a	22	13	16	16			0		147			YES	No Evidence of Extraprostatic Extension	NO	973D7AA9-2B8E-4D82-B15B-E98F1EBE06F9	Scheduled Follow-up Submission	Complete Remission/Response	9		No	YES	Core needle biopsy	Bilateral	NO	YES	12	11				NO	47	3	No	N1	T3b
TCGA-KK-A59X-01A	YES	NO	55	308.70.0	Nationwide Children's Hospital	TCGA-KK-A59X-F70433	A69AF1E4-9900-4EA6-A279-D4E0E95E19BA	TCGA-KK-A59X		Normal (no evidence of prostate cancer) [cM0]	M0	T3a	22	23	12	12			0	2233				YES	No Evidence of Extraprostatic Extension	NO	CDA530B0-2DE7-4383-AD4B-E3FA07E82BD3	Scheduled Follow-up Submission		9		No	YES	Core needle biopsy	Bilateral	NO	YES	12	2	Other, specify	Locoregional Recurrence	Bladder	YES	14	2	No	N1	T3b
TCGA-KK-A59X-11A	YES	NO	55	308.70.0	Nationwide Children's Hospital	TCGA-KK-A59X-F70433	A69AF1E4-9900-4EA6-A279-D4E0E95E19BA	TCGA-KK-A59X		Normal (no evidence of prostate cancer) [cM0]	M0	T3a	22	23	12	12			0	2233				YES	No Evidence of Extraprostatic Extension	NO	CDA530B0-2DE7-4383-AD4B-E3FA07E82BD3	Scheduled Follow-up Submission		9		No	YES	Core needle biopsy	Bilateral	NO	YES	12	2	Other, specify	Locoregional Recurrence	Bladder	YES	14	2	No	N1	T3b
TCGA-KC-A7FE-01A			62	348.57.0	Nationwide Children's Hospital			TCGA-KC-A7FE	NO	Abnormal (not related to prostate cancer)	M0	T1c	22		76	76	53		0		185			YES	No Evidence of Extraprostatic Extension	YES	0ECCE7CF-CAAD-4DD7-AF38-AE8108610449			7		No	YES	Core needle biopsy	Bilateral		YES	12						2	0	No	N0	T2c
TCGA-HC-7819-01A			53	184.82.0	Nationwide Children's Hospital	TCGA-HC-7819-F56150	5B9945B5-33E7-4B40-B01E-F7A4C4258336	TCGA-HC-7819			M0	T2c	22	29			-73		0		172			NO		YES	4CB016E3-F33E-4F56-B691-374F5209B7AB	Scheduled Follow-up Submission	Complete Remission/Response	8		No	YES	Core needle biopsy	Bilateral	NO	YES	12	1				NO	3	0	No	N0	T2c
TCGA-HC-7819-11A			53	184.82.0	Nationwide Children's Hospital	TCGA-HC-7819-F56150	5B9945B5-33E7-4B40-B01E-F7A4C4258336	TCGA-HC-7819			M0	T2c	22	29			-73		0		172			NO		YES	4CB016E3-F33E-4F56-B691-374F5209B7AB	Scheduled Follow-up Submission	Complete Remission/Response	8		No	YES	Core needle biopsy	Bilateral	NO	YES	12	1				NO	3	0	No	N0	T2c
TCGA-HC-8257-01A			70	221.78.0	Nationwide Children's Hospital	TCGA-HC-8257-F57852	B33048A0-FAC3-4629-93AB-7133DCCE813C	TCGA-HC-8257	NO				22	27					0		726						94501789-3E84-481F-8376-1CBADB55D152	Scheduled Follow-up Submission	Complete Remission/Response	7		No	YES		Bilateral	NO	YES	12	3				NO	8	1	No	N1	T3b
TCGA-G9-6366-01A			61	184.82.0	Nationwide Children's Hospital	TCGA-G9-6366-F40971	BEC1F225-0D25-4143-95DE-079D4D04C1A9	TCGA-G9-6366	NO			T1c	22	8					0		101			NO		NO	B85219FA-4B29-4E93-84F0-30D2D0831002	Scheduled Follow-up Submission		7		No	YES	Core needle biopsy	Left	YES	NO	12	3							No		T3b
TCGA-J4-A83L-01A			61	357.55.0	Nationwide Children's Hospital	TCGA-J4-A83L-F70493	E7A8E0E0-4B6A-4E8B-B7DB-7658BDB77EBB	TCGA-J4-A83L	NO		M0	T1c	22	18					0		316						CEC8F8FA-A262-4E42-B014-11BF9819073C	Scheduled Follow-up Submission	Complete Remission/Response	7		No	YES	Core needle biopsy	Bilateral	NO	YES	12	2				NO	5	0	No	N0	T2c
TCGA-HC-8259-01A			50	221.78.0	Nationwide Children's Hospital	TCGA-HC-8259-F66035	CFA29EB1-FDCE-4F79-AF35-76D5F3193115	TCGA-HC-8259	NO		M0	T1c	22	1					0		123						1F0E3CFC-2A8F-413E-A5E4-5225FC5CBFFE	Scheduled Follow-up Submission	Complete Remission/Response	6		No	YES	Core needle biopsy	Left	NO	NO	12	10				NO			No		T2a
TCGA-HC-8259-11A			50	221.78.0	Nationwide Children's Hospital	TCGA-HC-8259-F66035	CFA29EB1-FDCE-4F79-AF35-76D5F3193115	TCGA-HC-8259	NO		M0	T1c	22	1					0		123						1F0E3CFC-2A8F-413E-A5E4-5225FC5CBFFE	Scheduled Follow-up Submission	Complete Remission/Response	6		No	YES	Core needle biopsy	Left	NO	NO	12	10				NO			No		T2a
TCGA-XQ-A8TB-01A			67	370.53.0	Nationwide Children's Hospital	TCGA-XQ-A8TB-F69995	EADDF185-1DCE-44DF-B68D-DC0E2ADF167B	TCGA-XQ-A8TB	NO	Abnormal (not related to prostate cancer)	M0	T2a	22	26	-24				0		674			NO		NO	28D0A782-441D-4E5E-AC59-C89234CF01A5		Complete Remission/Response	9		No	YES	Core needle biopsy	Bilateral	NO	YES	12	1				NO	4	0	No	N0	T3b
TCGA-KK-A6E1-01A			57	315.66.0	Nationwide Children's Hospital	TCGA-KK-A6E1-F70479	9AD8D385-8909-4490-8F79-C51C5F78AD35	TCGA-KK-A6E1	NO	Normal (no evidence of prostate cancer) [cM0]	M0	T2c	22	18	-24	-24			0		356			YES	No Evidence of Extraprostatic Extension	NO	4E0B5B2E-443D-4B29-B2EA-6B5D8DF958FC	Scheduled Follow-up Submission		9		No	YES	Core needle biopsy	Bilateral	NO	YES	12	2					24	5	No	N1	T3b
TCGA-KK-A6E1-11A			57	315.66.0	Nationwide Children's Hospital	TCGA-KK-A6E1-F70479	9AD8D385-8909-4490-8F79-C51C5F78AD35	TCGA-KK-A6E1	NO	Normal (no evidence of prostate cancer) [cM0]	M0	T2c	22	18	-24	-24			0		356			YES	No Evidence of Extraprostatic Extension	NO	4E0B5B2E-443D-4B29-B2EA-6B5D8DF958FC	Scheduled Follow-up Submission		9		No	YES	Core needle biopsy	Bilateral	NO	YES	12	2					24	5	No	N1	T3b
TCGA-VP-A878-01A	YES	NO	58	357.55.0	Nationwide Children's Hospital	TCGA-VP-A878-F64439	953AD74B-DCE1-49C4-8C03-ED64209D058A	TCGA-VP-A878	NO	Normal (no evidence of prostate cancer) [cM0]		T1c	22	2	35	44		1843	0	2354	2704	1934	2011	YES	Extraprostatic Extension (regional lymphadenopathy)[e.g. cN1]	NO	9434552D-04CA-41EF-8E7F-AF3D927CCA20	Scheduled Follow-up Submission	Complete Remission/Response	9		No	YES	Core needle biopsy	Bilateral	NO	YES	12	9	Bone	Distant Metastasis		YES	3	1	No	N1	T2c
TCGA-VP-A872-01A			60	357.55.0	Nationwide Children's Hospital	TCGA-VP-A872-F64422	3B8814E3-4828-4021-9E32-FCEDBA18160D	TCGA-VP-A872	NO	Normal (no evidence of prostate cancer) [cM0]	M0	T2	22	2	8				0		3253			YES	No Evidence of Extraprostatic Extension	NO	01EC8B74-76CA-473B-9F77-1B9D7AE94DEE	Scheduled Follow-up Submission	Complete Remission/Response	8	mixed ductal and acinar	No	YES	Core needle biopsy	Bilateral	NO	YES	12	9				NO	12	0	No	N0	T3a
TCGA-G9-6356-01A			60	108.76.0	Nationwide Children's Hospital	TCGA-G9-6356-F40973	B7B147DA-EC3C-4F7F-9CB7-7AB6BF8C0402	TCGA-G9-6356	NO	Normal (no evidence of prostate cancer) [cM0]	M0	T1c	22	8	24	21			0		986			YES	No Evidence of Extraprostatic Extension	NO	73415424-9148-4D4F-A9CC-C3CE406A4BC5	Scheduled Follow-up Submission	Complete Remission/Response	9		No	YES	Core needle biopsy	Bilateral	NO	YES	12	3				NO	5	0	No	N0	T3b
TCGA-G9-6356-11A			60	108.76.0	Nationwide Children's Hospital	TCGA-G9-6356-F40973	B7B147DA-EC3C-4F7F-9CB7-7AB6BF8C0402	TCGA-G9-6356	NO	Normal (no evidence of prostate cancer) [cM0]	M0	T1c	22	8	24	21			0		986			YES	No Evidence of Extraprostatic Extension	NO	73415424-9148-4D4F-A9CC-C3CE406A4BC5	Scheduled Follow-up Submission	Complete Remission/Response	9		No	YES	Core needle biopsy	Bilateral	NO	YES	12	3				NO	5	0	No	N0	T3b
TCGA-J4-AATV-01A	NO	NO	71	429.43.0	Nationwide Children's Hospital	TCGA-J4-AATV-F70902	8630DE33-4BA5-4202-97D5-A67DBCDF530F	TCGA-J4-AATV	NO		M0		22	10					0		358						8C174AAB-F04D-45E6-A171-DB0937518773	Scheduled Follow-up Submission	Partial Remission/Response	6		No	YES	Core needle biopsy	Bilateral	NO	YES	12	3				NO	4		No	N0	T2c
TCGA-YL-A9WH-01A			67	389.51.0	Nationwide Children's Hospital	TCGA-YL-A9WH-F67282	FAA5AAA2-E217-4C05-A3E1-5281CED9A6DF	TCGA-YL-A9WH	NO	Normal (no evidence of prostate cancer) [cM0]	M0		22	3	55				0		349			NO		NO	8C0C326A-A9A0-4E36-B12A-4B1874296EDB	Scheduled Follow-up Submission	Stable Disease	9		No	YES	Core needle biopsy	Bilateral	YES	YES	12	11				NO	2	1	No	N1	T3b
TCGA-HC-8260-01A			43	221.78.0	Nationwide Children's Hospital	TCGA-HC-8260-F64387	0CC76757-83DA-4AE3-8AB6-328B0CE091A8	TCGA-HC-8260	NO		M0		22	29					0		106						7442F5D8-1216-4425-86A1-DB94EDF3B6C9	Scheduled Follow-up Submission	Complete Remission/Response	7		No	YES	Core needle biopsy	Bilateral	NO	YES	12	8				NO	9	0	No	N0	T2c
TCGA-HC-8260-11A			43	221.78.0	Nationwide Children's Hospital	TCGA-HC-8260-F64387	0CC76757-83DA-4AE3-8AB6-328B0CE091A8	TCGA-HC-8260	NO		M0		22	29					0		106						7442F5D8-1216-4425-86A1-DB94EDF3B6C9	Scheduled Follow-up Submission	Complete Remission/Response	7		No	YES	Core needle biopsy	Bilateral	NO	YES	12	8				NO	9	0	No	N0	T2c
TCGA-KK-A7AU-01A			63	331.61.0	Nationwide Children's Hospital	TCGA-KK-A7AU-F70505	95054B12-03B4-4D06-9715-494CF56BFB39	TCGA-KK-A7AU	NO		M0	T2b	22	24			123		0		1621			NO		YES	751D10FC-4B25-4A9E-A093-B94109E06343	Scheduled Follow-up Submission	Complete Remission/Response	9		No	YES	Core needle biopsy	Bilateral	NO	YES	12	2				NO	11	3	No	N1	T3b
TCGA-KK-A7AU-11A			63	331.61.0	Nationwide Children's Hospital	TCGA-KK-A7AU-F70505	95054B12-03B4-4D06-9715-494CF56BFB39	TCGA-KK-A7AU	NO		M0	T2b	22	24			123		0		1621			NO		YES	751D10FC-4B25-4A9E-A093-B94109E06343	Scheduled Follow-up Submission	Complete Remission/Response	9		No	YES	Core needle biopsy	Bilateral	NO	YES	12	2				NO	11	3	No	N1	T3b
TCGA-KK-A59Y-01A			56	285.66.0	Nationwide Children's Hospital	TCGA-KK-A59Y-F70436	1C602866-4036-44F3-819C-964E4ED1AC68	TCGA-KK-A59Y	NO	Normal (no evidence of prostate cancer) [cM0]	M0	T3a	22	16	13	13			0		1359			YES	No Evidence of Extraprostatic Extension	NO	ADCC76EA-BA02-4CCA-A93A-28356CFE0922	Scheduled Follow-up Submission	Complete Remission/Response	9		No	YES	Core needle biopsy	Bilateral	NO	YES	12	2				NO	4	2	No	N1	T3a
TCGA-KK-A59Y-11A			56	285.66.0	Nationwide Children's Hospital	TCGA-KK-A59Y-F70436	1C602866-4036-44F3-819C-964E4ED1AC68	TCGA-KK-A59Y	NO	Normal (no evidence of prostate cancer) [cM0]	M0	T3a	22	16	13	13			0		1359			YES	No Evidence of Extraprostatic Extension	NO	ADCC76EA-BA02-4CCA-A93A-28356CFE0922	Scheduled Follow-up Submission	Complete Remission/Response	9		No	YES	Core needle biopsy	Bilateral	NO	YES	12	2				NO	4	2	No	N1	T3a
TCGA-2A-A8VV-01A			52	389.51.0	Nationwide Children's Hospital	TCGA-2A-A8VV-F71800	FC901101-A4AB-466A-BBE9-8ADC403ECF47	TCGA-2A-A8VV	NO	Equivocal	M0	T2b	22	31	167	29	204		0		560			YES	No Evidence of Extraprostatic Extension	YES	456E0D8B-3028-41AC-B751-075FA99E7A91	Scheduled Follow-up Submission	Complete Remission/Response	6		No	YES	Core needle biopsy	Right	NO	YES	12	3				NO	16	0	No	N0	T2b
TCGA-KC-A7F6-01A			63	348.57.0	Nationwide Children's Hospital			TCGA-KC-A7F6	NO	Abnormal (not related to prostate cancer)	M0	T1c	22		44	44	-121		0		193			YES	No Evidence of Extraprostatic Extension	YES	A2DD56A7-4E4E-4990-BEE0-E68BA59F0217			7		No	YES	Core needle biopsy	Bilateral		YES	12						23	0	No	N0	T2c
TCGA-EJ-7123-01A			59	161.76.0	Nationwide Children's Hospital	TCGA-EJ-7123-F64800	C8A713D9-2E5E-4FB9-9161-2EA94E66EDCE	TCGA-EJ-7123	NO		M0	T1c	22	11					0		1491			NO		NO	775A4A5C-660D-4692-B6B0-7427BA18EFA8	Scheduled Follow-up Submission	Complete Remission/Response	7		No	YES	Core needle biopsy	Bilateral	NO	YES	12	9				NO	22	0	Yes	N0	T2c
TCGA-EJ-7123-11A			59	161.76.0	Nationwide Children's Hospital	TCGA-EJ-7123-F64800	C8A713D9-2E5E-4FB9-9161-2EA94E66EDCE	TCGA-EJ-7123	NO		M0	T1c	22	11					0		1491			NO		NO	775A4A5C-660D-4692-B6B0-7427BA18EFA8	Scheduled Follow-up Submission	Complete Remission/Response	7		No	YES	Core needle biopsy	Bilateral	NO	YES	12	9				NO	22	0	Yes	N0	T2c
TCGA-V1-A8WV-01A			52	389.51.0	Nationwide Children's Hospital	TCGA-V1-A8WV-F69419	02492E17-0E28-48D4-9A4C-8BA70DA046CB	TCGA-V1-A8WV	NO		M0	T2a	22	9		95					686			YES	No Evidence of Extraprostatic Extension	NO	75B50FA0-F36A-4C4D-B2B0-877B49B23020	Scheduled Follow-up Submission	Complete Remission/Response	9		No	YES	Core needle biopsy	Bilateral	NO	YES	12	1				NO	10	1	No	N1	T3b
TCGA-V1-A9OY-01A			57	429.43.0	Nationwide Children's Hospital	TCGA-V1-A9OY-F69409	2CB3D65F-6240-4146-879A-6EB998D7F3FD	TCGA-V1-A9OY	NO		M0	T2	22	9							170			NO		NO	DB173B43-5599-46BB-839F-17E2234C1070	Scheduled Follow-up Submission		7		No	YES	Core needle biopsy	Bilateral	NO	YES	12	1				NO	13	1	No	N1	T3a
TCGA-HC-7742-01A	YES	NO	58	184.82.0	Nationwide Children's Hospital	TCGA-HC-7742-F66039	89DA98AF-DA69-4CDC-8868-4190C8DD9ED3	TCGA-HC-7742	NO		M0		22	1				210	0		113	651					E19BAA6D-F627-4BEC-BBE8-304B26ABF246	Scheduled Follow-up Submission	Stable Disease	7		No	YES	Core needle biopsy		NO	YES	12	10		Biochemical evidence of disease		YES	2	0	No	N0	T3a
TCGA-HC-7742-11A	YES	NO	58	184.82.0	Nationwide Children's Hospital	TCGA-HC-7742-F66039	89DA98AF-DA69-4CDC-8868-4190C8DD9ED3	TCGA-HC-7742	NO		M0		22	1				210	0		113	651					E19BAA6D-F627-4BEC-BBE8-304B26ABF246	Scheduled Follow-up Submission	Stable Disease	7		No	YES	Core needle biopsy		NO	YES	12	10		Biochemical evidence of disease		YES	2	0	No	N0	T3a
TCGA-KK-A7B0-01A			67	331.61.0	Nationwide Children's Hospital	TCGA-KK-A7B0-F70516	2010FD18-F2E9-44A8-8304-3DF6A96CA2BD	TCGA-KK-A7B0	NO		M0	T2b	22	24					0		999			NO		NO	B575CFC2-AECA-4671-A06F-BDC34BB9C59F	Scheduled Follow-up Submission	Complete Remission/Response	9		No	YES	Core needle biopsy	Bilateral	NO	YES	12	2				NO	17	0	No	N0	T3b
TCGA-KK-A7B0-11A			67	331.61.0	Nationwide Children's Hospital	TCGA-KK-A7B0-F70516	2010FD18-F2E9-44A8-8304-3DF6A96CA2BD	TCGA-KK-A7B0	NO		M0	T2b	22	24					0		999			NO		NO	B575CFC2-AECA-4671-A06F-BDC34BB9C59F	Scheduled Follow-up Submission	Complete Remission/Response	9		No	YES	Core needle biopsy	Bilateral	NO	YES	12	2				NO	17	0	No	N0	T3b
TCGA-EJ-7125-01A			44	161.76.0	Nationwide Children's Hospital	TCGA-EJ-7125-F64801	6D638954-553E-4BE1-9361-EB1ABA8EB37D	TCGA-EJ-7125	NO	Normal (no evidence of prostate cancer) [cM0]	M0	T1c	22	11	12				0		1860			NO		NO	0081F74E-3F72-49A9-8727-0330AB65CD27	Scheduled Follow-up Submission	Complete Remission/Response	7		No	YES	Core needle biopsy	Bilateral	NO	YES	12	9				NO	13	0	No	N0	T2c
TCGA-EJ-7125-11A			44	161.76.0	Nationwide Children's Hospital	TCGA-EJ-7125-F64801	6D638954-553E-4BE1-9361-EB1ABA8EB37D	TCGA-EJ-7125	NO	Normal (no evidence of prostate cancer) [cM0]	M0	T1c	22	11	12				0		1860			NO		NO	0081F74E-3F72-49A9-8727-0330AB65CD27	Scheduled Follow-up Submission	Complete Remission/Response	7		No	YES	Core needle biopsy	Bilateral	NO	YES	12	9				NO	13	0	No	N0	T2c
TCGA-VN-A88P-01A			60	357.55.0	Nationwide Children's Hospital	TCGA-VN-A88P-F69078	EE761ACB-4569-45C6-B2FE-024F9883180A	TCGA-VN-A88P	NO	Abnormal (not related to prostate cancer)	M0	T1c	22	29	839	839	805		0		917			YES	No Evidence of Extraprostatic Extension	YES	31D6E561-612C-4889-9145-3C0050D1D03C	Scheduled Follow-up Submission	Complete Remission/Response	7		No	YES	Core needle biopsy	Bilateral	NO	YES	12	12				NO	65	0	No	N0	T2c
TCGA-ZG-A9KY-01A			73	429.43.0	Nationwide Children's Hospital	TCGA-ZG-A9KY-F67809	A007709C-9EE3-417C-98B8-5A6C642F6A7A	TCGA-ZG-A9KY		Normal (no evidence of prostate cancer) [cM0]	M0	T1c	22	12	14	14			0					YES	No Evidence of Extraprostatic Extension	NO	76AC923A-2DA7-4231-AB39-4E22F8BF074D	Scheduled Follow-up Submission	Stable Disease	9		No	YES	Core needle biopsy	Bilateral	NO	YES	12	11				NO	16	2	No	N1	T4
TCGA-CH-5748-01A			64	91.78.0	Nationwide Children's Hospital			TCGA-CH-5748					22						0					NO		NO	353E756A-54D5-4ADC-BD4C-F66EBB2F4E92			7		No	YES	Core needle biopsy	Bilateral		YES	12						2	0	No	N0	T3a
TCGA-KK-A8IC-01A	YES	NO	54	370.53.0	Nationwide Children's Hospital	TCGA-KK-A8IC-F64008	799B8089-1E04-42E1-B73F-D7CA30575451	TCGA-KK-A8IC	YES	Normal (no evidence of prostate cancer) [cM0]	M0	T1c	22	25	7	6		1060	0	1060	2047	2019		YES	No Evidence of Extraprostatic Extension	NO	FD1667EF-E739-4EB9-BC99-96DCF67A40BC	Additional New Tumor Event	Stable Disease	9		No	YES	Core needle biopsy	Bilateral	NO	YES	12	8		Biochemical evidence of disease		YES	38		No	N0	T3b
TCGA-KK-A8IC-11A	YES	NO	54	370.53.0	Nationwide Children's Hospital	TCGA-KK-A8IC-F64008	799B8089-1E04-42E1-B73F-D7CA30575451	TCGA-KK-A8IC	YES	Normal (no evidence of prostate cancer) [cM0]	M0	T1c	22	25	7	6		1060	0	1060	2047	2019		YES	No Evidence of Extraprostatic Extension	NO	FD1667EF-E739-4EB9-BC99-96DCF67A40BC	Additional New Tumor Event	Stable Disease	9		No	YES	Core needle biopsy	Bilateral	NO	YES	12	8		Biochemical evidence of disease		YES	38		No	N0	T3b
TCGA-CH-5739-01A			65	91.78.0	Nationwide Children's Hospital	TCGA-CH-5739-F28977	7265f7ed-c47f-4bc0-8772-95ac505b493b	TCGA-CH-5739	NO		M0		22	15					0		586			NO		NO	6C4F20AE-407F-489E-8680-5E46643FB777	Scheduled Follow-up Submission	Complete Remission/Response	7		No	YES	Core needle biopsy	Left		YES	12	2				NO	8	0	No	N0	T3a
TCGA-M7-A725-01A			56	331.61.0	Nationwide Children's Hospital	TCGA-M7-A725-F61814	62CBA045-8801-4491-AA2F-4F29B53B58D5	TCGA-M7-A725	NO	Normal (no evidence of prostate cancer) [cM0]	M0	T3a	22	10	16	16			0		96			YES	No Evidence of Extraprostatic Extension	NO	7191C1F5-B88B-4D54-889C-C2D93891B5FE	Scheduled Follow-up Submission		7		No	YES	Core needle biopsy	Bilateral	NO	YES	12	7				NO	11	0	No	N0	T3b
TCGA-HC-A76W-01A			73	348.57.0	Nationwide Children's Hospital			TCGA-HC-A76W	NO	Normal (no evidence of prostate cancer) [cM0]	M0	T2	22		62				0		213			NO		NO	42F636A4-3F4F-4D4D-B60C-E4B2E98DC97D			7		No	YES	Core needle biopsy	Bilateral		YES	12						4	0	Yes, History of Synchronous/Bilateral Malignancy	N0	T3b
TCGA-VN-A88O-01A			49	357.55.0	Nationwide Children's Hospital	TCGA-VN-A88O-F72128	74FC01CD-296C-4215-8FCA-6038BE3AB176	TCGA-VN-A88O	NO		M0	T1c	22	17			70		0		376			NO		YES	D6DC37EB-15CD-4C61-981D-7E81A6712851	Scheduled Follow-up Submission		7		No	YES	Core needle biopsy	Bilateral	YES	YES	12	4					34	0	No	N0	T2c
TCGA-ZG-A9LM-01A			72	429.43.0	Nationwide Children's Hospital	TCGA-ZG-A9LM-F67938	84C9F390-09A3-4B8B-A07C-95F5A9F76380	TCGA-ZG-A9LM	NO		M0	T2b	22	13		14			0		121			YES	No Evidence of Extraprostatic Extension	NO	57D63B06-DE65-44DD-8C61-484CA1DF1DB4	Scheduled Follow-up Submission	Complete Remission/Response	9		No	YES	Core needle biopsy	Right	NO	YES	12	11				NO	11	2	No	N1	T3a
TCGA-EJ-AB27-01A			51	429.43.0	Nationwide Children's Hospital	TCGA-EJ-AB27-F64798	BBF9F2E0-EFFC-4BEB-97E2-654A74406A9A	TCGA-EJ-AB27	NO		M0	T1c	22	11					0		145						FF0E521E-4368-44A4-9BE2-2B892EF40E90	Scheduled Follow-up Submission	Complete Remission/Response	6		No	YES	Core needle biopsy	Bilateral	NO	YES	12	9				NO	15	0	No	N0	T2c
TCGA-G9-6351-01A			51	161.76.0	Nationwide Children's Hospital	TCGA-G9-6351-F40969	BAB2AC8F-3C71-4CAB-AC6C-5FBEDFBCF7C7	TCGA-G9-6351	NO	Normal (no evidence of prostate cancer) [cM0]	M0	T1c	22	8	8	11			0		1215			YES	No Evidence of Extraprostatic Extension	NO	28E11FE0-7CE3-49EC-B50A-8CD13AB06099	Scheduled Follow-up Submission	Complete Remission/Response	7		No	YES	Core needle biopsy	Bilateral	NO	NO	12	3				NO			No		T2c
TCGA-G9-6351-11A			51	161.76.0	Nationwide Children's Hospital	TCGA-G9-6351-F40969	BAB2AC8F-3C71-4CAB-AC6C-5FBEDFBCF7C7	TCGA-G9-6351	NO	Normal (no evidence of prostate cancer) [cM0]	M0	T1c	22	8	8	11			0		1215			YES	No Evidence of Extraprostatic Extension	NO	28E11FE0-7CE3-49EC-B50A-8CD13AB06099	Scheduled Follow-up Submission	Complete Remission/Response	7		No	YES	Core needle biopsy	Bilateral	NO	NO	12	3				NO			No		T2c
TCGA-HI-7169-01A			55	184.82.0	Nationwide Children's Hospital	TCGA-HI-7169-F29015	f5d5446b-9aa0-42c6-a348-379be5faa470	TCGA-HI-7169	NO	Normal (no evidence of prostate cancer) [cM0]	M0	T2b	22	21	33				0		1941			NO		NO	102F46F5-3AEB-4717-8A22-8F5DF935C74F	Scheduled Follow-up Submission	Complete Remission/Response	7		No	YES	Core needle biopsy	Bilateral		YES	12	2				NO	4	0	No	N0	T3a
TCGA-J4-A67T-01A			63	315.66.0	Nationwide Children's Hospital	TCGA-J4-A67T-F63922	29B22533-3A1A-470D-A375-E979A99BC933	TCGA-J4-A67T	NO		M0	T1c	22	21					0		154						EF05D110-15C2-4E58-9302-7371AE54B241	Scheduled Follow-up Submission		7		No	YES	Core needle biopsy	Bilateral	YES	NO	12	8							No		T2c
TCGA-G9-6347-01A			59	320.62.0	Nationwide Children's Hospital	TCGA-G9-6347-F61289	068802A8-1CC7-4A3F-A871-73936010752B	TCGA-G9-6347	NO		M0	T1c	22	26					0		1718			NO		NO	BD38A53E-4F15-41E8-BE1F-92F968701982	Scheduled Follow-up Submission	Complete Remission/Response	6		No	YES	Core needle biopsy	Bilateral	NO	NO	12	6				NO			No		T2c
TCGA-ZG-A9M4-01A			65	429.43.0	Nationwide Children's Hospital	TCGA-ZG-A9M4-F67945	710894EA-9C17-4F77-B5BA-8D202410B07E	TCGA-ZG-A9M4	NO	Normal (no evidence of prostate cancer) [cM0]	M0	T2a	22	13	21	22			0		218			YES	Extraprostatic Extension (regional lymphadenopathy)[e.g. cN1]	NO	1DED19D0-544C-48DB-BAE5-9B9FB0FDEE59	Scheduled Follow-up Submission	Stable Disease	9		No	YES	Core needle biopsy	Bilateral	NO	YES	12	11				NO	18	1	No	N1	T3b
TCGA-QU-A6IO-01A			53	320.62.0	Nationwide Children's Hospital	TCGA-QU-A6IO-F66985	FCCC95EC-8070-4CF9-96BD-F8104870A403	TCGA-QU-A6IO	NO		M0	T1c	22	31					0		1436			NO		NO	D41262AC-1BCD-4CED-AEED-2B1EE8EB31EA	Scheduled Follow-up Submission	Complete Remission/Response	6		No	YES	Core needle biopsy	Bilateral	NO	YES	12	10				NO	2	0	No	N0	T2c
TCGA-CH-5764-01A			66	91.78.0	Nationwide Children's Hospital			TCGA-CH-5764	NO	Normal (no evidence of prostate cancer) [cM0]	M0		22		31	31			0		29			YES	No Evidence of Extraprostatic Extension	NO	74160F0D-C476-4AB9-9CF9-72821ED1A18D			7		No	YES	Core needle biopsy	Bilateral		YES	12						8	0	Yes	N0	T3b
TCGA-CH-5764-11A			66	91.78.0	Nationwide Children's Hospital			TCGA-CH-5764	NO	Normal (no evidence of prostate cancer) [cM0]	M0		22		31	31			0		29			YES	No Evidence of Extraprostatic Extension	NO	74160F0D-C476-4AB9-9CF9-72821ED1A18D			7		No	YES	Core needle biopsy	Bilateral		YES	12						8	0	Yes	N0	T3b
TCGA-G9-6353-01A			58	161.76.0	Nationwide Children's Hospital	TCGA-G9-6353-F42753	06BE0EA3-3C21-45C8-8FC9-C567255302F4	TCGA-G9-6353	NO		M0	T1c	22	30					0		590			NO		NO	79C97D58-7ED2-4742-9E66-F4A9DFC28DE7	Scheduled Follow-up Submission	Complete Remission/Response	7		No	YES	Core needle biopsy	Bilateral	NO	NO	12	4				NO			No		T3a
TCGA-G9-6353-11A			58	161.76.0	Nationwide Children's Hospital	TCGA-G9-6353-F42753	06BE0EA3-3C21-45C8-8FC9-C567255302F4	TCGA-G9-6353	NO		M0	T1c	22	30					0		590			NO		NO	79C97D58-7ED2-4742-9E66-F4A9DFC28DE7	Scheduled Follow-up Submission	Complete Remission/Response	7		No	YES	Core needle biopsy	Bilateral	NO	NO	12	4				NO			No		T3a
TCGA-EJ-A65G-01A			57	308.70.0	Nationwide Children's Hospital	TCGA-EJ-A65G-F64719	42136714-0A48-4A68-AF37-383198166E90	TCGA-EJ-A65G	NO		M0	T2c	22	10					0		152						31559A2C-AE6F-45A4-85AD-B91065953D85	Scheduled Follow-up Submission	Complete Remission/Response	8		No	YES	Transurethral resection (TURBT)	Bilateral	NO	YES	12	9				NO	24	0	No	N0	T2c
TCGA-G9-7510-01A			66	221.78.0	Nationwide Children's Hospital	TCGA-G9-7510-F48752	CC7397E6-4F9B-4759-96FE-23E612740417	TCGA-G9-7510	NO	Normal (no evidence of prostate cancer) [cM0]	M0	T1c	22	20	22	22			0		674			YES	Extraprostatic Extension (regional lymphadenopathy)[e.g. cN1]	NO	83B4A8F0-2338-4995-9CCC-3B0696249A81	Scheduled Follow-up Submission	Complete Remission/Response	8		No	YES	Core needle biopsy	Bilateral	NO	YES	12	9				NO	10	0	No	N0	T3a
TCGA-EJ-7325-01B			63	331.61.0	Nationwide Children's Hospital	TCGA-EJ-7325-F64803	32559980-8910-48B5-BE61-1E9C7C7A4598	TCGA-EJ-7325	NO		M0	T3b	22	11					0		507						095CDFE8-71E3-40DC-AB5C-16C59A8970DD	Scheduled Follow-up Submission	Complete Remission/Response	7		No	YES	Core needle biopsy	Bilateral	NO	YES	12	9				NO	9	0	Yes, History of Prior Malignancy	N0	T3b
TCGA-G9-6498-01A			53	315.66.0	Nationwide Children's Hospital	TCGA-G9-6498-F65343	EFC19889-579D-4B4D-937F-2F64A2C2968F	TCGA-G9-6498	NO	Normal (no evidence of prostate cancer) [cM0]	M0	T1c	22	22	47				0		1608			NO		NO	A02821C7-6112-42C7-81DA-DEE751067F3F	Scheduled Follow-up Submission	Complete Remission/Response	7		No	YES	Core needle biopsy	Bilateral	NO	NO	12	9				NO			No		T3a
TCGA-HC-A632-01A			68	308.70.0	Nationwide Children's Hospital			TCGA-HC-A632	NO		M0	T1c	22						0								8919C6F3-C573-4AA4-B5E1-B71FC2EC2698			9		No	YES	Core needle biopsy	Bilateral		YES	12						5	0	No	N0	T3a
TCGA-HC-7820-01A			72	184.82.0	Nationwide Children's Hospital	TCGA-HC-7820-F57012	CB4D6465-F671-42D3-8571-4C75C6EB9658	TCGA-HC-7820					22	28					0								DF93808D-A554-4F5C-9752-3C2272411D41	Scheduled Follow-up Submission	Complete Remission/Response	7		No	YES	Core needle biopsy	Bilateral	NO	NO	12	2				NO			No		T2c
TCGA-HC-7820-11A			72	184.82.0	Nationwide Children's Hospital	TCGA-HC-7820-F57012	CB4D6465-F671-42D3-8571-4C75C6EB9658	TCGA-HC-7820					22	28					0								DF93808D-A554-4F5C-9752-3C2272411D41	Scheduled Follow-up Submission	Complete Remission/Response	7		No	YES	Core needle biopsy	Bilateral	NO	NO	12	2				NO			No		T2c
TCGA-J4-A83J-01A			68	370.53.0	Nationwide Children's Hospital	TCGA-J4-A83J-F70133	5AEC66EF-0840-4E70-A0A4-5519547A84B2	TCGA-J4-A83J	NO		M0	T1c	22	28					0		235						4FB41AAB-FF53-47EB-AE32-C1EC6EE69FB8	Scheduled Follow-up Submission	Complete Remission/Response	7		No	YES	Core needle biopsy	Bilateral	NO	YES	12	1				NO	1	0	No	N0	T2c
TCGA-J4-A83J-11A			68	370.53.0	Nationwide Children's Hospital	TCGA-J4-A83J-F70133	5AEC66EF-0840-4E70-A0A4-5519547A84B2	TCGA-J4-A83J	NO		M0	T1c	22	28					0		235						4FB41AAB-FF53-47EB-AE32-C1EC6EE69FB8	Scheduled Follow-up Submission	Complete Remission/Response	7		No	YES	Core needle biopsy	Bilateral	NO	YES	12	1				NO	1	0	No	N0	T2c
TCGA-ZG-A9LZ-01A			66	429.43.0	Nationwide Children's Hospital	TCGA-ZG-A9LZ-F67847	2CA8E556-CD03-4B93-A20B-5CCB9736F2F9	TCGA-ZG-A9LZ	YES	Normal (no evidence of prostate cancer) [cM0]	M0	T3a	22	12	-15	-9			0		692			YES	No Evidence of Extraprostatic Extension	NO	CCE85841-CA1F-4927-B5B6-96D9A8C779FF	Scheduled Follow-up Submission	Stable Disease	9		No	YES	Core needle biopsy	Bilateral	NO	YES	12	11				NO	5	0	No	N0	T3b
TCGA-EJ-5522-01A			51	91.78.0	Nationwide Children's Hospital	TCGA-EJ-5522-F46759	44F09400-4A4E-4127-B395-7537AE10A920	TCGA-EJ-5522	NO		M0	T2a	22	16					0		1403			NO		NO	B40C8836-9245-48F8-BF89-4C642BA57B8F	Scheduled Follow-up Submission	Complete Remission/Response	7		No	YES	Core needle biopsy	Bilateral	NO	YES	12	8				NO	22	0	No	N0	T2c
TCGA-EJ-5502-01A			50	91.78.0	Nationwide Children's Hospital	TCGA-EJ-5502-F46203	FBF12F0D-ED5E-4A8B-8264-3A4563C2CA4E	TCGA-EJ-5502	NO	Normal (no evidence of prostate cancer) [cM0]	M0	T2c	22	3	7	7			0		603			YES	No Evidence of Extraprostatic Extension	NO	28CB850D-2299-4372-8FF0-636A0E247570	Scheduled Follow-up Submission	Complete Remission/Response	7		No	YES	Core needle biopsy	Bilateral	NO	YES	12	8				NO	11	0	No	N0	T2c
TCGA-EJ-7786-01A			62	184.82.0	Nationwide Children's Hospital	TCGA-EJ-7786-F48958	B887F832-42ED-433E-A92C-F62C2F8044DD	TCGA-EJ-7786	NO		M0	T1c	22	24					0		79			NO		NO	50E9A3BD-EC6F-411A-9914-E7347ABACEBC	Scheduled Follow-up Submission	Complete Remission/Response	7		No	YES	Core needle biopsy	Bilateral	NO	YES	12	9				NO	5	0	No	N0	T2c
TCGA-EJ-7786-11A			62	184.82.0	Nationwide Children's Hospital	TCGA-EJ-7786-F48958	B887F832-42ED-433E-A92C-F62C2F8044DD	TCGA-EJ-7786	NO		M0	T1c	22	24					0		79			NO		NO	50E9A3BD-EC6F-411A-9914-E7347ABACEBC	Scheduled Follow-up Submission	Complete Remission/Response	7		No	YES	Core needle biopsy	Bilateral	NO	YES	12	9				NO	5	0	No	N0	T2c
TCGA-G9-6370-01A			52	108.76.0	Nationwide Children's Hospital	TCGA-G9-6370-F40638	B6E94F74-A879-4886-90D3-20E392CC43A0	TCGA-G9-6370	NO		M0	T1c	22	26					0		806			NO		NO	5BDE4E1E-49C1-4567-A440-632F236B80FD	Scheduled Follow-up Submission	Complete Remission/Response	7		No	YES	Core needle biopsy	Bilateral	NO	YES	12	2				NO	1	0	No	N0	T3b
TCGA-HC-A6AS-01A			70	312.65.0	Nationwide Children's Hospital			TCGA-HC-A6AS		Normal (no evidence of prostate cancer) [cM0]	M0	T1c	22		27	27			0					YES	No Evidence of Extraprostatic Extension	NO	A77FBFFE-AD4C-4C8C-9756-F2BC3E4117D8			7		No	YES	Core needle biopsy	Right		YES	12						5	0	No	N0	T2a
TCGA-EJ-A46B-01A			66	268.67.0	Nationwide Children's Hospital	TCGA-EJ-A46B-F64641	84F9A37E-9D9B-4D21-AD17-732333FF59BD	TCGA-EJ-A46B	NO	Normal (no evidence of prostate cancer) [cM0]	M0	T1c	22	8	10	10			0		157			YES	No Evidence of Extraprostatic Extension		AD8B6C6D-C1D3-46EC-9EE4-CAC65683B0C1	Scheduled Follow-up Submission	Complete Remission/Response	8		No	YES	Core needle biopsy	Bilateral	NO	YES	12	9				NO	10	0	Yes, History of Prior Malignancy	N0	T3a
TCGA-J4-A83N-01A	YES	YES	57	357.55.0	Nationwide Children's Hospital	TCGA-J4-A83N-F70169	58123E43-BD1F-456E-B272-E223AE32F0D3	TCGA-J4-A83N	NO		M0	T1c	22	29					0	433	530						EB0D0104-C667-4E1A-91AD-86C59C5236F1	Scheduled Follow-up Submission	Progressive Disease	7		No	YES	Core needle biopsy	Bilateral	NO	NO	12	1		New Primary Tumor		YES			No		T2c
TCGA-EJ-5542-01A			60	91.78.0	Nationwide Children's Hospital	TCGA-EJ-5542-F48838	37DB51C3-1BF3-4D63-ABDE-4319456AB8D7	TCGA-EJ-5542	NO	Normal (no evidence of prostate cancer) [cM0]	M0	T2b	22	23	8	9	-21		0		519			YES	No Evidence of Extraprostatic Extension	YES	53EC2047-D35F-43AF-962E-32AC27FB4410	Scheduled Follow-up Submission	Complete Remission/Response	7		No	YES	Core needle biopsy	Bilateral	NO	YES	12	9				NO	17	0	Yes	N0	T3a
TCGA-KC-A4BV-01A			66	285.66.0	Nationwide Children's Hospital			TCGA-KC-A4BV	YES	Normal (no evidence of prostate cancer) [cM0]	M0	T2	22		16	18	81		0		1328			YES	No Evidence of Extraprostatic Extension	YES	4FF98B00-E121-441D-8D66-2F96EF40631F			9		No	YES	Core needle biopsy	Bilateral		YES	12						10	0	No	N0	T3a
TCGA-M7-A723-01A			54	331.61.0	Nationwide Children's Hospital	TCGA-M7-A723-F61813	744EEEBC-99E5-4713-A2F9-57F96B813305	TCGA-M7-A723	NO	Normal (no evidence of prostate cancer) [cM0]	M0	T1c	22	7	8	11			0		62			YES	No Evidence of Extraprostatic Extension	NO	158F7520-1E4A-4AA8-BF17-A96A98619661	Scheduled Follow-up Submission	Complete Remission/Response	7		No	YES	Core needle biopsy	Bilateral	NO	YES	12	7				NO	17	1	No	N1	T3b
TCGA-HC-A4ZV-01A			56	285.66.0	Nationwide Children's Hospital			TCGA-HC-A4ZV				T2c	22						0								DFA2803C-2985-40AB-970D-81679E982165			9		No	YES	Core needle biopsy	Bilateral		YES	12						13	0	No	N0	T3b
TCGA-HC-7817-01B			52	308.70.0	Nationwide Children's Hospital	TCGA-HC-7817-F60204	7E6E7437-1B8E-4A24-B921-5B558A15181C	TCGA-HC-7817	NO	Normal (no evidence of prostate cancer) [cM0]	M0		22	31					0		171			YES	No Evidence of Extraprostatic Extension	YES	B5C6D9CA-F454-416B-92F8-862947F978CF	Scheduled Follow-up Submission	Complete Remission/Response	7		No	YES	Core needle biopsy	Bilateral	NO	NO	12	5				NO			No		T3b
TCGA-EJ-5501-01A			55	91.78.0	Nationwide Children's Hospital	TCGA-EJ-5501-F46202	888320E4-BDAE-4601-8105-9B8669942A38	TCGA-EJ-5501	NO	Normal (no evidence of prostate cancer) [cM0]	M0	T2b	22	3	9	9			0		729			YES	No Evidence of Extraprostatic Extension	NO	82E8C87D-5FE1-44E9-8B0B-016BB9946DED	Scheduled Follow-up Submission	Complete Remission/Response	7		No	YES	Core needle biopsy	Bilateral	NO	YES	12	8				NO	11	0	No	N0	T3b
TCGA-EJ-7318-01B			51	331.61.0	Nationwide Children's Hospital	TCGA-EJ-7318-F64810	BDD9A240-8570-46B6-8FEA-E1F2CC7F80AE	TCGA-EJ-7318	YES		M0	T3a	22	11					0		189						0EDD0BEB-B408-4FDF-8080-D59864CA1395	Scheduled Follow-up Submission	Complete Remission/Response	7		No	YES	Core needle biopsy	Bilateral	NO	NO	12	9				NO			No		T3a
TCGA-VP-A87D-01A			54	357.55.0	Nationwide Children's Hospital	TCGA-VP-A87D-F64469	B66E94CB-5242-40DC-8EDC-068829339CBE	TCGA-VP-A87D	YES	Normal (no evidence of prostate cancer) [cM0]	M0	T1c	22	3	14		12		0		1853			NO		YES	24287E0B-273E-4C96-B7FD-87C042CDED56	Scheduled Follow-up Submission	Complete Remission/Response	9		No	YES	Core needle biopsy	Bilateral	YES	YES	12	9				NO	12	3	No	N1	T3a
TCGA-J9-A52D-01A			71	308.70.0	Nationwide Children's Hospital			TCGA-J9-A52D	NO	Normal (no evidence of prostate cancer) [cM0]	M0	T2b	22		-6	21			0		146			YES	No Evidence of Extraprostatic Extension	NO	97374AA3-C361-4636-9EF9-7A73B35B90A4			9	Prostate Adenocarcinoma, Not Otherwised Specified, with ductal featues	No	YES	Core needle biopsy	Bilateral		NO	12								No		T3a
TCGA-HC-A76X-01A			62	348.57.0	Nationwide Children's Hospital			TCGA-HC-A76X	NO	Normal (no evidence of prostate cancer) [cM0]	M0	T1c	22		10				0		150						C497D607-7714-4FA4-9343-B5EF79021753			7		No	YES	Core needle biopsy	Bilateral		YES	12						1	0	No	N0	T2c
TCGA-2A-A8W3-01A			69	389.51.0	Nationwide Children's Hospital	TCGA-2A-A8W3-F71815	50CC6A78-1576-40D2-AC0B-EEDFE398939F	TCGA-2A-A8W3	YES	Normal (no evidence of prostate cancer) [cM0]	M0	T2b	22	31	13	13	-14	198	0	198	771			YES	No Evidence of Extraprostatic Extension	YES	9C2D1395-B78A-4290-91AA-0C6887C0172E	Scheduled Follow-up Submission		9		No	YES	Core needle biopsy	Left	NO	YES	12	3		Biochemical evidence of disease		YES	3	0	No	N0	T3a
TCGA-FC-A6HD-01A			77	320.62.0	Nationwide Children's Hospital	TCGA-FC-A6HD-F59729	01544724-D25A-4ADB-A456-5DB1EF806003	TCGA-FC-A6HD		Normal (no evidence of prostate cancer) [cM0]	M0	T3a	22	20	33	33			0					YES	No Evidence of Extraprostatic Extension	NO	891002FA-53EC-4CBB-93FE-CE998572A935	Scheduled Follow-up Submission	Complete Remission/Response	7		No	YES	Core needle biopsy	Bilateral	NO	YES	12	5				NO	10	0	No	N0	T3a
TCGA-ZG-A9L2-01A			70	429.43.0	Nationwide Children's Hospital	TCGA-ZG-A9L2-F67812	D1242B70-600E-479A-BA11-2F48DC40DFF8	TCGA-ZG-A9L2	YES	Normal (no evidence of prostate cancer) [cM0]	M0	T3a	22	12	6				0		1137			NO		NO	D755A8E2-F0C7-4130-B034-AAF1F078F87F	Scheduled Follow-up Submission	Stable Disease	9		No	YES	Core needle biopsy		NO	YES	12	11				NO	14	0	No	N0	T3b
TCGA-FC-A5OB-01A			53	308.70.0	Nationwide Children's Hospital	TCGA-FC-A5OB-F61434	E2A7F91D-C6D0-4597-822B-9BB75C0CA49A	TCGA-FC-A5OB	NO	Abnormal (not related to prostate cancer)	M0	T3a	22	30	9	9			0		110			YES	No Evidence of Extraprostatic Extension	NO	83BE641D-33BA-481D-B13F-5078C8B74DD2	Scheduled Follow-up Submission		9		No	YES	Core needle biopsy	Bilateral	NO	YES	12	6				NO	9	0	No	N0	T3b
TCGA-YL-A8HK-01A			59	370.53.0	Nationwide Children's Hospital	TCGA-YL-A8HK-F56601	216B174D-24A4-466A-92E1-09D2A40F508A	TCGA-YL-A8HK	YES	Normal (no evidence of prostate cancer) [cM0]	M0		22	13	27	195		1376	0	1376	1491			YES	No Evidence of Extraprostatic Extension	NO	B9B04636-D3B1-49C3-956A-53146A234B1C	Additional New Tumor Event		9		No	YES	Core needle biopsy	Bilateral	NO	YES	12	3		Biochemical evidence of disease		YES	1	0	No	N0	T3b
TCGA-G9-6348-01A			68	108.76.0	Nationwide Children's Hospital	TCGA-G9-6348-F40648	09804433-748D-4BCD-A78C-591903061A38	TCGA-G9-6348	NO	Abnormal (not related to prostate cancer)	M0	T3a	22	26	31	31			0		1136			YES	No Evidence of Extraprostatic Extension	NO	008E503C-7F15-40D8-98A8-8832086D8442	Scheduled Follow-up Submission	Complete Remission/Response	7		No	YES	Core needle biopsy	Bilateral	NO		12	2				NO	15	0	No	N0	T2c
TCGA-G9-6348-11A			68	108.76.0	Nationwide Children's Hospital	TCGA-G9-6348-F40648	09804433-748D-4BCD-A78C-591903061A38	TCGA-G9-6348	NO	Abnormal (not related to prostate cancer)	M0	T3a	22	26	31	31			0		1136			YES	No Evidence of Extraprostatic Extension	NO	008E503C-7F15-40D8-98A8-8832086D8442	Scheduled Follow-up Submission	Complete Remission/Response	7		No	YES	Core needle biopsy	Bilateral	NO		12	2				NO	15	0	No	N0	T2c
TCGA-YL-A8SL-01B			74	389.51.0	Nationwide Children's Hospital	TCGA-YL-A8SL-F67548	E3C74F8C-0993-4815-8C6E-99D41CFB0604	TCGA-YL-A8SL	NO	Normal (no evidence of prostate cancer) [cM0]	M0		22	6	41	43			0		623			YES	Extraprostatic Extension (regional lymphadenopathy)[e.g. cN1]	NO	5D7529C5-0068-48B8-8B25-1C00E5EE8A10	Scheduled Follow-up Submission	Complete Remission/Response	8		No	YES	Core needle biopsy	Bilateral	NO	YES	12	11				NO	19	3	No	N1	T3b
TCGA-EJ-5519-01A			64	91.78.0	Nationwide Children's Hospital	TCGA-EJ-5519-F46603	69D9DAE5-C73F-43AA-86E2-4CC00CC8FAED	TCGA-EJ-5519	YES	Normal (no evidence of prostate cancer) [cM0]	M0	T2c	22	12	13				0		1153			NO		NO	FA7742E4-27F5-4D45-8DAA-65BBC9008796	Scheduled Follow-up Submission	Complete Remission/Response	8		No	YES	Core needle biopsy	Bilateral	NO	YES	12	8				NO	12	3	No	N1	T3b
TCGA-EJ-A8FS-01A			66	357.55.0	Nationwide Children's Hospital	TCGA-EJ-A8FS-F64787	4C47660B-427A-4FB1-855F-31AA97D9A198	TCGA-EJ-A8FS	YES		M0	T3a	22	11					0		216						E61F634C-EC2E-4EE4-B306-208A6A65B38F	Scheduled Follow-up Submission	Complete Remission/Response	7		No	YES	Transurethral resection (TURBT)	Bilateral	NO	YES	12	9				NO	69	0	No	N0	T3a
TCGA-J4-A67O-01A			59	312.65.0	Nationwide Children's Hospital	TCGA-J4-A67O-F63884	991AB9F0-402C-4353-8897-1E2D2B74C05F	TCGA-J4-A67O	NO		M0	T2a	22	20					0		490						9A486781-2160-4461-9DFE-CE8446E5C5A0	Scheduled Follow-up Submission	Complete Remission/Response	7		No	YES	Core needle biopsy	Bilateral	NO	YES	12	8				NO	2	0	No	N0	T2c
TCGA-ZG-A8QW-01A			72	389.51.0	Nationwide Children's Hospital	TCGA-ZG-A8QW-F67802	608DD5A0-F2AC-41F2-944F-8BEBF75E453B	TCGA-ZG-A8QW		Normal (no evidence of prostate cancer) [cM0]	M0	T3a	22	12	8		43		0					NO		YES	674ABE2C-2955-43AF-8208-EB38350AD2A7	Scheduled Follow-up Submission	Stable Disease	9		No	YES	Core needle biopsy	Bilateral	NO	YES	12	11				NO	13	1	No	N1	T3b
TCGA-ZG-A9L6-01A	NO	NO	64	429.43.0	Nationwide Children's Hospital	TCGA-ZG-A9L6-F67817	FE1C5236-E125-4313-B519-028C4F7BC289	TCGA-ZG-A9L6	YES	Normal (no evidence of prostate cancer) [cM0]	M0	T1c	22	12	13	13			0		664			YES	No Evidence of Extraprostatic Extension	NO	A12BBD6F-6FE2-4085-943A-6DB26386D11A	Scheduled Follow-up Submission	Stable Disease	9		No	YES	Core needle biopsy	Bilateral	NO	YES	12	11				NO	25	0	No	N0	T3b
TCGA-VN-A88I-01A			59	357.55.0	Nationwide Children's Hospital	TCGA-VN-A88I-F62589	208008F6-B086-4FA1-8C01-9ECCB4474C9A	TCGA-VN-A88I	NO	Abnormal (not related to prostate cancer)	M0	T1c	22	21	9		-1		0		269			NO		YES	594B6C87-D247-4AE5-9454-20427C04296D	Scheduled Follow-up Submission		8		No	YES	Core needle biopsy	Bilateral	YES	YES	12	7					11	0	No	N0	T3a
TCGA-VP-A87J-01A			56	357.55.0	Nationwide Children's Hospital	TCGA-VP-A87J-F64485	E94F9FDB-3732-42F0-976E-FE439CD436AA	TCGA-VP-A87J	NO	Normal (no evidence of prostate cancer) [cM0]	M0	T2a	22	3	11	13			0		1296			YES	No Evidence of Extraprostatic Extension	NO	291A5E8E-E9F8-4EE1-8AFB-E9D2F571D685	Scheduled Follow-up Submission	Complete Remission/Response	7		No	YES	Core needle biopsy	Bilateral	NO	YES	12	9				NO	11	1	No	N1	T3a
TCGA-EJ-8474-01A			69	244.69.0	Nationwide Children's Hospital	TCGA-EJ-8474-F64640	B1B3D399-6A5A-42AB-845E-2DA72C824F94	TCGA-EJ-8474	NO	Normal (no evidence of prostate cancer) [cM0]	M0	T3a	22	8	51	7			0		766			YES	No Evidence of Extraprostatic Extension		224C4C5B-BD47-4B62-BB84-B8D5667DF5DE	Scheduled Follow-up Submission	Complete Remission/Response	8		No	YES	Core needle biopsy	Bilateral	NO	YES	12	9				NO	15	0	No	N0	T3a
TCGA-EJ-8474-11A			69	244.69.0	Nationwide Children's Hospital	TCGA-EJ-8474-F64640	B1B3D399-6A5A-42AB-845E-2DA72C824F94	TCGA-EJ-8474	NO	Normal (no evidence of prostate cancer) [cM0]	M0	T3a	22	8	51	7			0		766			YES	No Evidence of Extraprostatic Extension		224C4C5B-BD47-4B62-BB84-B8D5667DF5DE	Scheduled Follow-up Submission	Complete Remission/Response	8		No	YES	Core needle biopsy	Bilateral	NO	YES	12	9				NO	15	0	No	N0	T3a
TCGA-YJ-A8SW-01A			67	389.51.0	Nationwide Children's Hospital			TCGA-YJ-A8SW	YES			T1c	22						0		148						1C19B356-50AE-4FBA-9FFD-98DDB60FC7D0			9	adenocarcinoma with focal mucinous features	No	YES	Core needle biopsy	Right		YES	12						2	0	No	N0	T3b
TCGA-VP-A876-01A			46	357.55.0	Nationwide Children's Hospital	TCGA-VP-A876-F64436	16471D14-C549-45F2-9C7E-539A9C04B262	TCGA-VP-A876	NO	Normal (no evidence of prostate cancer) [cM0]		T1c	22	2	13	13			0		2576			YES	No Evidence of Extraprostatic Extension	NO	F77C1E84-6E49-44F5-8A35-2B7CF11A9A47	Scheduled Follow-up Submission	Complete Remission/Response	8		No	YES	Core needle biopsy	Bilateral	NO	YES	12	9				NO	12	0	No	N0	T2c
TCGA-EJ-8468-01A			63	244.69.0	Nationwide Children's Hospital	TCGA-EJ-8468-F64614	B6C1285C-737B-450E-8D70-81D0CB3BB171	TCGA-EJ-8468	NO	Normal (no evidence of prostate cancer) [cM0]		T3a	22	5	23	23			0		1961			YES			1C90F24C-3318-4DA0-8F88-E00D7898FA53	Scheduled Follow-up Submission	Complete Remission/Response	8		No	YES	Core needle biopsy	Left	NO	YES	12	9				NO	7	0	No	N0	T3a
TCGA-EJ-8468-11A			63	244.69.0	Nationwide Children's Hospital	TCGA-EJ-8468-F64614	B6C1285C-737B-450E-8D70-81D0CB3BB171	TCGA-EJ-8468	NO	Normal (no evidence of prostate cancer) [cM0]		T3a	22	5	23	23			0		1961			YES			1C90F24C-3318-4DA0-8F88-E00D7898FA53	Scheduled Follow-up Submission	Complete Remission/Response	8		No	YES	Core needle biopsy	Left	NO	YES	12	9				NO	7	0	No	N0	T3a
TCGA-HC-7230-01A			50	184.82.0	Nationwide Children's Hospital	TCGA-HC-7230-F64379	F7F6D088-BF11-40D2-9013-2E5B3FEB7386	TCGA-HC-7230					22	29					0								4B7575DE-87E0-48F8-9C59-03BFE863ADC9	Scheduled Follow-up Submission	Complete Remission/Response	7		No	YES	Core needle biopsy		NO	YES	12	8				NO	3	0	No	N0	T2c
TCGA-EJ-5498-01A			56	91.78.0	Nationwide Children's Hospital	TCGA-EJ-5498-F46200	C0E97F6E-6B21-4761-887A-06D59D419638	TCGA-EJ-5498	NO	Normal (no evidence of prostate cancer) [cM0]		T2c	22	3	12	12			0		537			YES	No Evidence of Extraprostatic Extension	NO	A9918CDB-80EA-4025-84C4-0018666236C4	Scheduled Follow-up Submission	Complete Remission/Response	7		No	YES	Core needle biopsy	Bilateral	NO	YES	12	8				NO	26	0	No	N0	T2c
TCGA-2A-A8W1-01A			54	389.51.0	Nationwide Children's Hospital	TCGA-2A-A8W1-F71808	8ECE00DC-877F-4CF3-9B4E-99CD261A68A6	TCGA-2A-A8W1	NO	Normal (no evidence of prostate cancer) [cM0]	M0	T1c	22	31	27				0		-122			NO		NO	FA6BCFE6-BB77-4097-B610-AF2F2494EAB8	Scheduled Follow-up Submission		7		No	YES	Core needle biopsy	Left	NO	YES	12	3				NO	12	0	No	N0	T3a
TCGA-J4-A83M-01A	NO	YES	64	357.55.0	Nationwide Children's Hospital	TCGA-J4-A83M-F70485	14AB2D17-160F-4837-8834-437C93436169	TCGA-J4-A83M	NO		M0	T2c	22	18				521	0	521	437						4EA04FDC-4401-436F-B8B9-54BFA5718873	Scheduled Follow-up Submission	Partial Remission/Response	7		No	YES	Core needle biopsy	Bilateral	NO	YES	12	2		Biochemical evidence of disease		YES	4	0	No	N0	T2c
TCGA-HC-A6AL-01A			64	312.65.0	Nationwide Children's Hospital			TCGA-HC-A6AL			M0	T1c	22			21			0					YES	No Evidence of Extraprostatic Extension	NO	E5D08F93-1DE8-4901-AD3B-F72C319C3B9E			7		No	YES	Core needle biopsy	Bilateral		YES	12						3	0	No	N0	T2c
TCGA-EJ-5499-01A			61	91.78.0	Nationwide Children's Hospital	TCGA-EJ-5499-F46201	5687A1AE-AD09-447E-88EA-1F13ADA4A0FB	TCGA-EJ-5499	NO		M0	T2b	22	3					0		533						56753EEA-2AA1-4742-A299-49E315BC3584	Scheduled Follow-up Submission	Complete Remission/Response	7		No	YES	Core needle biopsy	Bilateral	NO	YES	12	8				NO	19	0	No	N0	T3a
TCGA-XK-AAJ3-01A			56	429.43.0	Nationwide Children's Hospital	TCGA-XK-AAJ3-F66870	CF864CC0-D963-4D1C-929D-7AB2FFBF3936	TCGA-XK-AAJ3	NO	Normal (no evidence of prostate cancer) [cM0]	M0	T1c	22	24	13	6			0		863			YES	No Evidence of Extraprostatic Extension	NO	4F6A4DB2-BFB9-4602-ACE7-47FA316F1CF7	Scheduled Follow-up Submission		8		No	YES	Core needle biopsy	Bilateral	NO	YES	12	10					6	0	Yes, History of Prior Malignancy	N0	T3a
TCGA-G9-6332-01A	NO	NO	55	108.76.0	Nationwide Children's Hospital	TCGA-G9-6332-F40974	546CCAB0-37A4-403B-B982-D259A70C19D6	TCGA-G9-6332		Normal (no evidence of prostate cancer) [cM0]	M0	T2b	22	8	11	11		1180	0	1180	2090			YES	No Evidence of Extraprostatic Extension	NO	875811CC-C799-46AD-8DFD-B08D42F34F9B	Scheduled Follow-up Submission	Progressive Disease	7		No	YES	Core needle biopsy	Bilateral	NO	YES	12	3		Biochemical evidence of disease		YES	7	0	No	N0	T3a
TCGA-G9-6332-11A	NO	NO	55	108.76.0	Nationwide Children's Hospital	TCGA-G9-6332-F40974	546CCAB0-37A4-403B-B982-D259A70C19D6	TCGA-G9-6332		Normal (no evidence of prostate cancer) [cM0]	M0	T2b	22	8	11	11		1180	0	1180	2090			YES	No Evidence of Extraprostatic Extension	NO	875811CC-C799-46AD-8DFD-B08D42F34F9B	Scheduled Follow-up Submission	Progressive Disease	7		No	YES	Core needle biopsy	Bilateral	NO	YES	12	3		Biochemical evidence of disease		YES	7	0	No	N0	T3a
TCGA-TK-A8OK-01A			73	370.53.0	Nationwide Children's Hospital	TCGA-TK-A8OK-F58472	71A38EC1-0B07-482D-BD73-AC6F0CC238DC	TCGA-TK-A8OK			M0		22	11					0								82E0946B-6B6D-45E4-A2D1-6742843A06F8	Scheduled Follow-up Submission		7		No	YES	Core needle biopsy	Right	YES		12	11							No
TCGA-HC-8216-01A			58	308.70.0	Nationwide Children's Hospital	TCGA-HC-8216-F48769	62126F02-53E9-4ECC-9C94-4FC5622E5A7C	TCGA-HC-8216		Normal (no evidence of prostate cancer) [cM0]	M0	T2a	22	20	10	10			0		137			YES	No Evidence of Extraprostatic Extension	NO	A3302782-976A-4B07-B897-B8A3AD529A79	Scheduled Follow-up Submission	Complete Remission/Response	7		No	YES	Core needle biopsy	Right	NO	YES	12	9				NO	3	0	No	N0	T3a
TCGA-VN-A88L-01A			54	357.55.0	Nationwide Children's Hospital	TCGA-VN-A88L-F65022	30BB6BBA-560E-4981-9DDF-870E43920795	TCGA-VN-A88L	NO		M0	T1c	22	22			79		0		394			NO		YES	03856F28-2661-48F5-80DC-2263900352BC	Scheduled Follow-up Submission	Complete Remission/Response	7		No	YES	Core needle biopsy	Bilateral	NO	YES	12	12				NO	18	0	No	N0	T2c
TCGA-HC-A9TE-01A	YES	YES	64	429.43.0	Nationwide Children's Hospital	TCGA-HC-A9TE-F72404	0090F46F-FA6A-4C3C-A5FD-DEB336530AC8	TCGA-HC-A9TE	NO	Normal (no evidence of prostate cancer) [cM0]	M0	T2c	22	10	13	16		216	0	216	134			YES	No Evidence of Extraprostatic Extension	NO	98B1CCF8-1903-42A5-B92B-5B5C0D3F63C7	Scheduled Follow-up Submission	Stable Disease	9		No	YES	Transurethral resection (TURBT)	Bilateral	NO	YES	12	6	Other, specify	Biochemical evidence of disease	Biochemical	YES	7	1	No	N0	T3b
TCGA-EJ-A7NK-01A			58	357.55.0	Nationwide Children's Hospital	TCGA-EJ-A7NK-F64761	4BB44108-C209-4020-A9E6-A18853D75E1E	TCGA-EJ-A7NK	NO		M0	T3a	22	10					0		295						96A4FD93-5E87-41AD-B95B-880E374066BD	Scheduled Follow-up Submission	Complete Remission/Response	7		No	YES	Transurethral resection (TURBT)	Bilateral	NO	YES	12	9				NO	48	0	No	N0	T3a
TCGA-EJ-5494-01A			50	91.78.0	Nationwide Children's Hospital	TCGA-EJ-5494-F46196	8BB308D6-BD5D-4A5E-BBD3-9401DC5E6044	TCGA-EJ-5494	NO		M0	T2a	22	3					0		184						2CF48C9F-C247-47F1-9553-E40D538FF87A	Scheduled Follow-up Submission	Complete Remission/Response	7		No	YES	Core needle biopsy	Bilateral	NO	YES	12	8				NO	17	0	No	N0	T3a
TCGA-KK-A8IF-01A			57	370.53.0	Nationwide Children's Hospital			TCGA-KK-A8IF	YES		M0	T2a	22				522		0		788			NO		YES	76D502EE-897C-4BBC-8E28-5AD2E086A623			7		No	YES	Core needle biopsy	Bilateral		YES	12						33		No	N0	T3a
TCGA-KK-A8IF-11A			57	370.53.0	Nationwide Children's Hospital			TCGA-KK-A8IF	YES		M0	T2a	22				522		0		788			NO		YES	76D502EE-897C-4BBC-8E28-5AD2E086A623			7		No	YES	Core needle biopsy	Bilateral		YES	12						33		No	N0	T3a
TCGA-XJ-A9DX-01A	YES	YES	51	389.51.0	Nationwide Children's Hospital	TCGA-XJ-A9DX-F66568	04C130F3-15B7-41DA-95B8-D631CAF9FB54	TCGA-XJ-A9DX	NO		M1c	T1c	22	20				151	0		790			NO		NO	EFB107B6-73B5-4C2A-B9C2-B77C601C1EE1	Scheduled Follow-up Submission	Partial Remission/Response	9		No	YES	Core needle biopsy	Bilateral	NO	YES	12	10		Biochemical evidence of disease		YES	22	2	No	N1	T3b
TCGA-J4-A67M-01A			55	312.65.0	Nationwide Children's Hospital	TCGA-J4-A67M-F63853	9CA59A45-3966-465C-BB1F-FE82B2F3CC98	TCGA-J4-A67M	NO		M0	T2a	22	20					0		482						2F876C9C-FB7B-4B39-A5FE-0360A003BB66	Scheduled Follow-up Submission	Complete Remission/Response	7		No	YES	Core needle biopsy	Bilateral	NO	YES	12	8				NO	6	0	No	N0	T3a
TCGA-V1-A9ZG-01A			64	429.43.0	Nationwide Children's Hospital	TCGA-V1-A9ZG-F70257	373B335F-84A2-4059-BC08-EA14D897AA5A	TCGA-V1-A9ZG	NO		M0	T1c	22	2							893			NO		NO	2F038D13-0F84-48BF-8BDE-410209E2056D	Scheduled Follow-up Submission	Complete Remission/Response	9		No	YES	Core needle biopsy	Bilateral	NO	YES	12	2				NO	5	0	No	N0	T2c
TCGA-EJ-A65M-01A			65	308.70.0	Nationwide Children's Hospital	TCGA-EJ-A65M-F64721	09F233CA-8F51-4BF9-B091-1E4D49C8FB9A	TCGA-EJ-A65M	NO		M0	T2c	22	10					0		230						1FE181E0-9900-4494-B194-DB6C7F3A9741	Scheduled Follow-up Submission	Complete Remission/Response	6		No	YES	Transurethral resection (TURBT)	Bilateral	NO	YES	12	9				NO	30	0	No	N0	T2c
TCGA-HC-7745-01A			65	184.82.0	Nationwide Children's Hospital	TCGA-HC-7745-F66044	2AA0CC1C-7B82-46E4-9938-A83B5D0DEA89	TCGA-HC-7745					22	1					0					NO		NO	EBF0148E-BF7E-4C08-B3FA-E72895D75CBF	Scheduled Follow-up Submission	Complete Remission/Response	7		No	YES	Core needle biopsy	Bilateral	NO	YES	12	10				NO	3	0	No	N0	T3b
TCGA-HC-7745-11A			65	184.82.0	Nationwide Children's Hospital	TCGA-HC-7745-F66044	2AA0CC1C-7B82-46E4-9938-A83B5D0DEA89	TCGA-HC-7745					22	1					0					NO		NO	EBF0148E-BF7E-4C08-B3FA-E72895D75CBF	Scheduled Follow-up Submission	Complete Remission/Response	7		No	YES	Core needle biopsy	Bilateral	NO	YES	12	10				NO	3	0	No	N0	T3b
TCGA-KK-A6DY-01A			50	315.66.0	Nationwide Children's Hospital	TCGA-KK-A6DY-F70446	CEBBDE45-2726-4F97-94E9-F61B0FF33C53	TCGA-KK-A6DY	NO		M0	T1c	22	16					0		903			NO		NO	4A1FAA4E-AE5E-4EE6-8C4A-32130EA7F67C	Scheduled Follow-up Submission		7		No	YES	Core needle biopsy	Bilateral	NO	YES	12	2					12	0	No	N0	T2c
TCGA-KK-A6DY-11A			50	315.66.0	Nationwide Children's Hospital	TCGA-KK-A6DY-F70446	CEBBDE45-2726-4F97-94E9-F61B0FF33C53	TCGA-KK-A6DY	NO		M0	T1c	22	16					0		903			NO		NO	4A1FAA4E-AE5E-4EE6-8C4A-32130EA7F67C	Scheduled Follow-up Submission		7		No	YES	Core needle biopsy	Bilateral	NO	YES	12	2					12	0	No	N0	T2c
TCGA-EJ-7791-01A			67	184.82.0	Nationwide Children's Hospital	TCGA-EJ-7791-F48843	7F7176F8-1D09-4D9F-BE14-9E93ED5D7B94	TCGA-EJ-7791	NO		M0	T1c	22	23					0		217			NO		NO	D0B6FCDF-43ED-4BA0-9BEF-3EB8FDDE80D9	Scheduled Follow-up Submission	Complete Remission/Response	7		No	YES	Core needle biopsy	Bilateral	NO	YES	12	9				NO	18	0	No	N0	T2c
TCGA-V1-A9O9-01A			56	429.43.0	Nationwide Children's Hospital	TCGA-V1-A9O9-F69445	B6682FE2-3365-4CB9-9CDC-74BCCDBCB214	TCGA-V1-A9O9	YES		M0		22	9							-53			NO		NO	F79A23AD-200F-455E-8DD0-F680B01FB34E	Scheduled Follow-up Submission		8		No	YES	Core needle biopsy	Bilateral	NO	YES	12	1				NO	12	0	No	N0	T3b
TCGA-X4-A8KQ-01A			65	370.53.0	Nationwide Children's Hospital	TCGA-X4-A8KQ-F67716	02AD5EBD-C957-471A-BF87-C6B00ED6650B	TCGA-X4-A8KQ	NO		M0	T1c	22	10				883	0		963			NO		NO	948C310E-CFDA-4F5B-847B-3158AC4D6191	Scheduled Follow-up Submission	Stable Disease	9		No	YES	Core needle biopsy	Right	NO	YES	12	11		Biochemical evidence of disease		YES	3	0	No	N0	T3b
TCGA-HC-7750-01A			50	184.82.0	Nationwide Children's Hospital	TCGA-HC-7750-F46692	434DCD48-D2CB-44F9-A574-E34C9C8A7FC3	TCGA-HC-7750			M0	T2b	22	13					0		83						C235F94E-B21C-4378-9F10-666716547CCD	Scheduled Follow-up Submission	Complete Remission/Response	7		No	YES	Core needle biopsy	Left	NO	NO	12	8				NO			No		T2c
TCGA-XK-AAJT-01A			75	429.43.0	Nationwide Children's Hospital	TCGA-XK-AAJT-F66883	FF9AE414-061B-421E-91DE-92A44E8C7C97	TCGA-XK-AAJT	NO	Normal (no evidence of prostate cancer) [cM0]	M0	T1c	22	24	19	14			0		566			YES	No Evidence of Extraprostatic Extension	NO	9A0F11DE-9455-4702-B0CE-908FC712AF9C	Scheduled Follow-up Submission	Complete Remission/Response	7		No	YES	Core needle biopsy	Bilateral	NO	YES	12	10				NO	4	0	No	N0	T3a
TCGA-CH-5740-01A			57	91.78.0	Nationwide Children's Hospital			TCGA-CH-5740	NO	Normal (no evidence of prostate cancer) [cM0]	M0		22		31		31		0					NO		YES	60A1E979-CE4C-4FB0-9254-00C5873B09FC			7		No	YES	Core needle biopsy	Bilateral		YES	12						4	0	No	N0	T2c
TCGA-H9-A6BY-01A			63	312.65.0	Nationwide Children's Hospital	TCGA-H9-A6BY-F58346	10983B24-3846-4D08-BF31-391482D8370D	TCGA-H9-A6BY				T1c	22	7					0								79635FC2-686C-459D-A639-3024AA33C0DB	Scheduled Follow-up Submission		7		No	YES	Core needle biopsy	Bilateral	YES	YES	12	4					19	0	No	N0	T3a
TCGA-XK-AAIW-01A			78	429.43.0	Nationwide Children's Hospital	TCGA-XK-AAIW-F67892	0006060C-F1BE-45CE-B168-2CE44F7606F0	TCGA-XK-AAIW	NO	Normal (no evidence of prostate cancer) [cM0]	M0	T2b	22	12	7	7			0		769			YES	No Evidence of Extraprostatic Extension	NO	B9508F2A-A179-49C0-95CA-C8E7812342B0	Scheduled Follow-up Submission	Complete Remission/Response	9		No	YES	Core needle biopsy	Bilateral	NO	YES	12	11				NO	7	0	No	N0	T3b
TCGA-J4-AAU2-01A			59	429.43.0	Nationwide Children's Hospital	TCGA-J4-AAU2-F70142	7EFEE0E2-85CE-4D9C-B6A4-EBDCB446F402	TCGA-J4-AAU2	NO		M0		22	28					0		224						5D1BD50C-AC8D-4999-828D-C5C2E0D8E71B	Scheduled Follow-up Submission	Complete Remission/Response	6		No	YES	Core needle biopsy	Bilateral	NO	YES	12	1				NO	1	0	No	N0	T2c
TCGA-YL-A8SQ-01B	YES	YES	61	389.51.0	Nationwide Children's Hospital	TCGA-YL-A8SQ-F59021	4E414DAE-923C-484D-9253-3E1AE3E4E20F	TCGA-YL-A8SQ	YES	Normal (no evidence of prostate cancer) [cM0]	M0		22	30	19			329	0	329	1943	1445		NO		NO	88776DC3-F31C-49C0-822F-165DCB346274	Scheduled Follow-up Submission	Stable Disease	9		No	YES	Core needle biopsy	Bilateral	NO	YES	12	4		Biochemical evidence of disease		YES	5	0	No	N0	T3b
TCGA-KK-A8IA-01A			69	370.53.0	Nationwide Children's Hospital	TCGA-KK-A8IA-F70528	6BF6F395-1BA4-42DB-A383-19578FF4D77A	TCGA-KK-A8IA	NO	Normal (no evidence of prostate cancer) [cM0]	M0	T3b	22	24	26	26			0		1383			YES	No Evidence of Extraprostatic Extension	NO	0EFBAE9A-3AE0-4916-8ED2-2FDC0055D198	Scheduled Follow-up Submission		9		No	YES	Core needle biopsy	Bilateral	NO	YES	12	2					19	3	No	N1	T3b
TCGA-KK-A8IA-11A			69	370.53.0	Nationwide Children's Hospital	TCGA-KK-A8IA-F70528	6BF6F395-1BA4-42DB-A383-19578FF4D77A	TCGA-KK-A8IA	NO	Normal (no evidence of prostate cancer) [cM0]	M0	T3b	22	24	26	26			0		1383			YES	No Evidence of Extraprostatic Extension	NO	0EFBAE9A-3AE0-4916-8ED2-2FDC0055D198	Scheduled Follow-up Submission		9		No	YES	Core needle biopsy	Bilateral	NO	YES	12	2					19	3	No	N1	T3b
TCGA-EJ-A7NJ-01A			59	357.55.0	Nationwide Children's Hospital	TCGA-EJ-A7NJ-F64727	8256711B-CE11-4EE8-B2B9-B4E7966D0F1F	TCGA-EJ-A7NJ	NO		M0	T2c	22	10					0		92						27D8C57F-F77B-4B57-BAE1-B000EE5E335E	Scheduled Follow-up Submission	Complete Remission/Response	8		No	YES	Core needle biopsy	Bilateral	NO	YES	12	9				NO	16	0	No	N0	T2c
TCGA-XJ-A83F-01A			67	357.55.0	Nationwide Children's Hospital	TCGA-XJ-A83F-F57164	FDC16F83-5F54-490F-92FD-0302F9E01219	TCGA-XJ-A83F	NO				22	3					0		762			NO		NO	DC50D0E5-5F68-44A6-8271-63217FED632E	Scheduled Follow-up Submission		7		No	YES	Transurethral resection (TURBT)	Right	NO	YES	12	10				NO	7	0	No	N0	T3a
TCGA-M7-A720-01A			53	331.61.0	Nationwide Children's Hospital	TCGA-M7-A720-F70038	4BF0B54B-0520-48E0-971D-96143D2E4AE0	TCGA-M7-A720	NO			T1c	22	26					0		302			NO		NO	ED53DDAE-22F8-49BE-A6AB-2CCC085EA71D	Scheduled Follow-up Submission	Complete Remission/Response	6		No	YES	Core needle biopsy	Bilateral	YES	NO	12	1				NO			No		T2c
TCGA-VP-A875-01A			67	357.55.0	Nationwide Children's Hospital	TCGA-VP-A875-F64433	A99A6071-2FA9-4C28-80D4-F7DC138C017F	TCGA-VP-A875	NO	Abnormal (not related to prostate cancer)	M0	T2a	22	2	15	15			0		867			YES	No Evidence of Extraprostatic Extension	NO	06334F50-18C4-46FB-A10F-062F889E03E2	Scheduled Follow-up Submission	Complete Remission/Response	7		No	YES	Core needle biopsy	Bilateral	YES	YES	12	9				NO	4	0	No	N0	T3a
TCGA-EJ-A46D-01A			53	268.67.0	Nationwide Children's Hospital	TCGA-EJ-A46D-F64643	B4093AF2-7749-4DBA-9038-5254586AC20E	TCGA-EJ-A46D	NO	Normal (no evidence of prostate cancer) [cM0]	M0	T2c	22	8	42				0		122						B4C09AB7-4280-4F82-B73A-19D09A12FA4D	Scheduled Follow-up Submission	Complete Remission/Response	8		No	YES	Core needle biopsy	Bilateral	NO	YES	12	9				NO	6	0	No	N0	T2c
TCGA-EJ-A65B-01A			55	312.65.0	Nationwide Children's Hospital	TCGA-EJ-A65B-F64715	2EB22091-7EE6-4B36-B3C0-94F8D231C7B9	TCGA-EJ-A65B	NO		M0	T3b	22	10					0		536						FC408FBF-7B38-4877-9A52-44A58B61108A	Scheduled Follow-up Submission	Complete Remission/Response	9	Mixed	No	YES	Core needle biopsy		NO	YES	12	9				NO	13	0	No	N0	T3b
TCGA-V1-A9O5-01A	NO	NO	64	429.43.0	Nationwide Children's Hospital	TCGA-V1-A9O5-F69449	F0993D17-C925-4C8A-A697-A2F8962A6643	TCGA-V1-A9O5	YES		M0	T2b	22	9		25		124			1776			YES	No Evidence of Extraprostatic Extension	NO	113938B9-4328-43C2-BBB6-EE3913EF3E1F	Scheduled Follow-up Submission	Complete Remission/Response	9		No	YES	Core needle biopsy	Bilateral	NO	YES	12	1		Biochemical evidence of disease		YES	20	6	No	N1	T4
TCGA-V1-A9O5-06A	NO	NO	64	429.43.0	Nationwide Children's Hospital	TCGA-V1-A9O5-F69449	F0993D17-C925-4C8A-A697-A2F8962A6643	TCGA-V1-A9O5	YES		M0	T2b	22	9		25		124			1776			YES	No Evidence of Extraprostatic Extension	NO	113938B9-4328-43C2-BBB6-EE3913EF3E1F	Scheduled Follow-up Submission	Complete Remission/Response	9		No	YES	Core needle biopsy	Bilateral	NO	YES	12	1		Biochemical evidence of disease		YES	20	6	No	N1	T4
TCGA-KC-A4BL-01A			65	268.67.0	Nationwide Children's Hospital			TCGA-KC-A4BL	YES	Abnormal (not related to prostate cancer)	M0	T1c	22		38	38	66		0		206			YES	No Evidence of Extraprostatic Extension	YES	C9092A49-A893-4A3C-A693-F6F3CCE7655A			7		Yes, Pharmaceutical Treatment Prior to Resection	YES	Core needle biopsy	Bilateral		YES	12						4	0	No	N0	T2c
TCGA-KK-A6E5-01A			63	315.66.0	Nationwide Children's Hospital	TCGA-KK-A6E5-F70484	ED95CEAD-2E5C-4FEF-9CEB-F7B371A5B07E	TCGA-KK-A6E5	NO	Normal (no evidence of prostate cancer) [cM0]	M0	T1c	22	24	-19	-19			0		1496			YES	No Evidence of Extraprostatic Extension	NO	E12B3481-66A9-40BC-910C-45CB4759ACE2	Scheduled Follow-up Submission	Complete Remission/Response	7		No	YES	Core needle biopsy	Bilateral	NO	YES	12	2				NO	27	0	No	N0	T3b
TCGA-KK-A6E5-11A			63	315.66.0	Nationwide Children's Hospital	TCGA-KK-A6E5-F70484	ED95CEAD-2E5C-4FEF-9CEB-F7B371A5B07E	TCGA-KK-A6E5	NO	Normal (no evidence of prostate cancer) [cM0]	M0	T1c	22	24	-19	-19			0		1496			YES	No Evidence of Extraprostatic Extension	NO	E12B3481-66A9-40BC-910C-45CB4759ACE2	Scheduled Follow-up Submission	Complete Remission/Response	7		No	YES	Core needle biopsy	Bilateral	NO	YES	12	2				NO	27	0	No	N0	T3b
TCGA-HC-8264-01B			60	244.69.0	Nationwide Children's Hospital			TCGA-HC-8264					22						0								4602FE76-0C44-46F3-B7C3-50D3FA1302C7			9		No	YES	Core needle biopsy	Bilateral		YES	12						2	1	No	N1	T3b
TCGA-YL-A8HJ-01A			58	370.53.0	Nationwide Children's Hospital	TCGA-YL-A8HJ-F67253	DA7D9481-B0C8-4788-A05E-1C2D009DC308	TCGA-YL-A8HJ	NO	Normal (no evidence of prostate cancer) [cM0]	M0		22	3	54	-34			0		1589			YES	No Evidence of Extraprostatic Extension	NO	664D7C6A-6AC5-4A81-BFC9-EFA1CAFE0D33	Scheduled Follow-up Submission	Complete Remission/Response	9	25-30% ductal component	No	YES	Core needle biopsy	Bilateral	NO	NO	12	11				NO			No		T3b
TCGA-CH-5763-01A			66	91.78.0	Nationwide Children's Hospital	TCGA-CH-5763-F28974	8bc71c57-3d08-445c-ace6-5bd3e201446b	TCGA-CH-5763	NO	Normal (no evidence of prostate cancer) [cM0]	M0		22	14	0	0			0		360			YES	No Evidence of Extraprostatic Extension	NO	C39F0889-6590-4F8B-B741-506D1689CD49	Scheduled Follow-up Submission	Complete Remission/Response	7		No	YES	Core needle biopsy	Bilateral		YES	12	2				NO	5	0	Yes	N0	T3a
TCGA-CH-5763-11A			66	91.78.0	Nationwide Children's Hospital	TCGA-CH-5763-F28974	8bc71c57-3d08-445c-ace6-5bd3e201446b	TCGA-CH-5763	NO	Normal (no evidence of prostate cancer) [cM0]	M0		22	14	0	0			0		360			YES	No Evidence of Extraprostatic Extension	NO	C39F0889-6590-4F8B-B741-506D1689CD49	Scheduled Follow-up Submission	Complete Remission/Response	7		No	YES	Core needle biopsy	Bilateral		YES	12	2				NO	5	0	Yes	N0	T3a
TCGA-G9-6496-01A			61	108.76.0	Nationwide Children's Hospital	TCGA-G9-6496-F41001	23E65826-1C0F-45E4-992D-10D9D2EE16D7	TCGA-G9-6496	NO	Normal (no evidence of prostate cancer) [cM0]	M0	T1c	22	8	19	20			0		703			YES	No Evidence of Extraprostatic Extension	NO	9C340E53-4089-45E1-BA11-84D31EA385CE	Scheduled Follow-up Submission	Complete Remission/Response	7		No	YES	Core needle biopsy	Bilateral	NO	YES	12	3				NO	15	0	No	N0	T2c
TCGA-G9-6496-11A			61	108.76.0	Nationwide Children's Hospital	TCGA-G9-6496-F41001	23E65826-1C0F-45E4-992D-10D9D2EE16D7	TCGA-G9-6496	NO	Normal (no evidence of prostate cancer) [cM0]	M0	T1c	22	8	19	20			0		703			YES	No Evidence of Extraprostatic Extension	NO	9C340E53-4089-45E1-BA11-84D31EA385CE	Scheduled Follow-up Submission	Complete Remission/Response	7		No	YES	Core needle biopsy	Bilateral	NO	YES	12	3				NO	15	0	No	N0	T2c
TCGA-CH-5741-01A			56	91.78.0	Nationwide Children's Hospital	TCGA-CH-5741-F29006	50d50d4b-61fb-4fdb-a345-2c2441524f1c	TCGA-CH-5741	NO	Normal (no evidence of prostate cancer) [cM0]	M0		22	15	30	30			0		339			YES	No Evidence of Extraprostatic Extension	NO	4DA4B1F8-9C51-44B8-B02F-98656B2F020C	Scheduled Follow-up Submission	Complete Remission/Response	9		No	YES	Core needle biopsy	Bilateral		YES	12	2				NO	5	1	No	N1	T3b
TCGA-G9-6363-01A			64	108.76.0	Nationwide Children's Hospital	TCGA-G9-6363-F40645	5059560A-473B-47A5-8317-83B8498AD49C	TCGA-G9-6363	NO	Normal (no evidence of prostate cancer) [cM0]	M0	T2b	22	26	58	23			0		993			YES	No Evidence of Extraprostatic Extension	NO	FF97333F-EACC-435F-B3CE-43B3FA5DC966	Scheduled Follow-up Submission	Complete Remission/Response	7		No	YES	Core needle biopsy	Bilateral	NO	YES	12	2				NO	6	0	No	N0	T4
TCGA-G9-6363-11A			64	108.76.0	Nationwide Children's Hospital	TCGA-G9-6363-F40645	5059560A-473B-47A5-8317-83B8498AD49C	TCGA-G9-6363	NO	Normal (no evidence of prostate cancer) [cM0]	M0	T2b	22	26	58	23			0		993			YES	No Evidence of Extraprostatic Extension	NO	FF97333F-EACC-435F-B3CE-43B3FA5DC966	Scheduled Follow-up Submission	Complete Remission/Response	7		No	YES	Core needle biopsy	Bilateral	NO	YES	12	2				NO	6	0	No	N0	T4
TCGA-KK-A7AQ-01A			62	348.57.0	Nationwide Children's Hospital	TCGA-KK-A7AQ-F70490	C7CB1A49-AE7D-48BD-90A4-51EC3264A31E	TCGA-KK-A7AQ	NO		M0	T2a	22	24			38		0		1385					YES	C3DA8DC6-D0D1-4CA8-AFBE-0E86583195FB	Scheduled Follow-up Submission	Complete Remission/Response	7		No	YES	Core needle biopsy	Bilateral	NO	YES	12	2				NO	11	0	No	N0	T2c
TCGA-KK-A7AQ-11A			62	348.57.0	Nationwide Children's Hospital	TCGA-KK-A7AQ-F70490	C7CB1A49-AE7D-48BD-90A4-51EC3264A31E	TCGA-KK-A7AQ	NO		M0	T2a	22	24			38		0		1385					YES	C3DA8DC6-D0D1-4CA8-AFBE-0E86583195FB	Scheduled Follow-up Submission	Complete Remission/Response	7		No	YES	Core needle biopsy	Bilateral	NO	YES	12	2				NO	11	0	No	N0	T2c
TCGA-EJ-7115-01A			65	184.82.0	Nationwide Children's Hospital	TCGA-EJ-7115-F64799	AFA4C550-03CD-49FC-AE67-4E3E79B65E98	TCGA-EJ-7115	NO	Normal (no evidence of prostate cancer) [cM0]	M0	T1c	22	11	10	10			0		204			YES	No Evidence of Extraprostatic Extension	NO	7BC1794A-976E-4328-9489-52462C4D8B10	Scheduled Follow-up Submission	Complete Remission/Response	7		No	YES	Core needle biopsy	Bilateral	NO	YES	12	9				NO	21	0	No	N0	T3a
TCGA-EJ-7115-11A			65	184.82.0	Nationwide Children's Hospital	TCGA-EJ-7115-F64799	AFA4C550-03CD-49FC-AE67-4E3E79B65E98	TCGA-EJ-7115	NO	Normal (no evidence of prostate cancer) [cM0]	M0	T1c	22	11	10	10			0		204			YES	No Evidence of Extraprostatic Extension	NO	7BC1794A-976E-4328-9489-52462C4D8B10	Scheduled Follow-up Submission	Complete Remission/Response	7		No	YES	Core needle biopsy	Bilateral	NO	YES	12	9				NO	21	0	No	N0	T3a
TCGA-HC-A6HY-01A			51	320.62.0	Nationwide Children's Hospital			TCGA-HC-A6HY			M0	T1c	22			92			0					YES	No Evidence of Extraprostatic Extension		B42FD217-7500-48B9-8770-F1770F31A5FD			7		No	YES	Core needle biopsy	Bilateral		NO	12								No		T2c
TCGA-G9-6494-01A			66	108.76.0	Nationwide Children's Hospital	TCGA-G9-6494-F41058	188B3C97-28C4-4922-A2DC-2C9DCD077C05	TCGA-G9-6494		Normal (no evidence of prostate cancer) [cM0]	M0	T1c	22	11	-13	-13			0		1423			YES	No Evidence of Extraprostatic Extension	NO	A38B9EEE-AD21-4C14-8EAB-D9CC0B433600	Scheduled Follow-up Submission	Progressive Disease	7		No	YES	Core needle biopsy	Bilateral	NO	YES	12	3				NO	2	0	No	N0	T4
TCGA-G9-6494-11A			66	108.76.0	Nationwide Children's Hospital	TCGA-G9-6494-F41058	188B3C97-28C4-4922-A2DC-2C9DCD077C05	TCGA-G9-6494		Normal (no evidence of prostate cancer) [cM0]	M0	T1c	22	11	-13	-13			0		1423			YES	No Evidence of Extraprostatic Extension	NO	A38B9EEE-AD21-4C14-8EAB-D9CC0B433600	Scheduled Follow-up Submission	Progressive Disease	7		No	YES	Core needle biopsy	Bilateral	NO	YES	12	3				NO	2	0	No	N0	T4
TCGA-G9-6343-01A			62	161.76.0	Nationwide Children's Hospital	TCGA-G9-6343-F40964	676A609C-7080-4BBF-AF1D-ABF2AA398AE0	TCGA-G9-6343	NO		M0	T2a	22	8					0		554			NO		NO	8E093351-D28D-4A71-86A1-322AB2A525D6	Scheduled Follow-up Submission		7		No	YES	Core needle biopsy	Bilateral	YES	NO	12	3							No		T2c
TCGA-EJ-5512-01A			46	91.78.0	Nationwide Children's Hospital	TCGA-EJ-5512-F46594	5A8C66E7-93F1-4CE2-96EF-5CA6FB8564BE	TCGA-EJ-5512	NO		M0	T1c	22	12					0		782						953552EB-AAC0-4F3C-941C-29EFF0FF0FDA	Scheduled Follow-up Submission	Complete Remission/Response	7		No	YES	Core needle biopsy	Bilateral	NO	YES	12	8				NO	13	0	No	N0	T2c
TCGA-QU-A6IL-01A			64	320.62.0	Nationwide Children's Hospital	TCGA-QU-A6IL-F66982	39C1D667-F1FD-4883-B2AF-75441003426E	TCGA-QU-A6IL	NO		M0	T2a	22	31					0		91						605A6728-7DFC-4F79-9F15-A05871B610A3		Complete Remission/Response	7		No	YES	Core needle biopsy	Bilateral	YES	YES	12	10				NO	4	0	No	N0	T2c
TCGA-XK-AAIV-01A			63	429.43.0	Nationwide Children's Hospital	TCGA-XK-AAIV-F66999	A36C46D9-EC54-4921-AEB1-A25A88B9C49A	TCGA-XK-AAIV	NO	Normal (no evidence of prostate cancer) [cM0]	M0	T1c	22	29	16	20	42		0		85			YES	No Evidence of Extraprostatic Extension	YES	E98A35A4-8033-4FEF-8B6A-8B9ED375DB63	Scheduled Follow-up Submission	Complete Remission/Response	10		No	YES	Core needle biopsy	Bilateral	NO	YES	12	10				NO	18	2	No	N1	T3b
TCGA-YL-A8S9-01A	NO	YES	63	389.51.0	Nationwide Children's Hospital	TCGA-YL-A8S9-F58868	487735B1-A2F9-4769-B5D9-B65AB3C3F570	TCGA-YL-A8S9	NO	Normal (no evidence of prostate cancer) [cM0]	M0		22	25	20				0	1006	1839			NO		NO	DA6865FC-2B83-4113-96C0-66A9B5464947	Additional New Tumor Event	Complete Remission/Response	9		No	YES	Core needle biopsy	Bilateral	NO	YES	12	4		Locoregional Recurrence		YES	5	0	No	N0	T3a
TCGA-FC-7961-01A			62	308.70.0	Nationwide Children's Hospital	TCGA-FC-7961-F33190	E289E313-02EE-4105-B6FD-DC904E81367F	TCGA-FC-7961			M0	T1c	22	22		65			0					YES	No Evidence of Extraprostatic Extension		FD74A61D-861A-4F5A-BA6D-5A4B29860AE0	Scheduled Follow-up Submission	Complete Remission/Response	9		No	YES	Core needle biopsy	Bilateral	YES	YES	12	6				NO	3	0	No	N0	T3a
TCGA-EJ-A65J-01A			62	315.66.0	Nationwide Children's Hospital	TCGA-EJ-A65J-F64720	2AE5B7EA-B4CB-4125-B708-E54F564FFB7A	TCGA-EJ-A65J	NO		M0	T3a	22	10					0		91						D6A20CE6-5EF6-422E-977B-84F2DEDD2389	Scheduled Follow-up Submission	Complete Remission/Response	9		No	YES	Core needle biopsy	Bilateral	NO	YES	12	9				NO	11	0	Yes, History of Prior Malignancy	N0	T3a
TCGA-EJ-5504-01A	NO	NO	65	91.78.0	Nationwide Children's Hospital	TCGA-EJ-5504-F46205	E27457FB-2F9A-40CB-8FCA-21AD85F9E33D	TCGA-EJ-5504	YES	Normal (no evidence of prostate cancer) [cM0]	M0	T2c	22	3	25	25		77	0		77	736		YES	Extraprostatic Extension (regional lymphadenopathy)[e.g. cN1]	NO	A828FB32-08EA-4738-87C0-1810723EE639	Scheduled Follow-up Submission	Progressive Disease	7		No	YES	Core needle biopsy	Bilateral	NO	YES	12	8		Biochemical evidence of disease		YES	18	1	No	N1	T3a
TCGA-G9-6369-01A			55	161.76.0	Nationwide Children's Hospital	TCGA-G9-6369-F40640	AF5835D3-9EC9-4D58-80DE-B8730AB58024	TCGA-G9-6369	NO	Normal (no evidence of prostate cancer) [cM0]	M0	T1c	22	26	35	23			0		851			YES	No Evidence of Extraprostatic Extension	NO	44776578-84AC-4FD9-904C-3F3FA4EF0D4D	Scheduled Follow-up Submission	Complete Remission/Response	7		No	YES	Core needle biopsy	Bilateral	NO	YES	12	2				NO	21	0	No	N0	T2c
TCGA-QU-A6IN-01A			61	320.62.0	Nationwide Children's Hospital	TCGA-QU-A6IN-F66984	820F9404-C47D-43EC-A8B2-D0F3E395DA5B	TCGA-QU-A6IN	NO	Normal (no evidence of prostate cancer) [cM0]	M0	T1c	22	31	21		43		0		3428			NO		YES	B158683C-374C-4488-AF20-CAF6FCCFCEF7	Scheduled Follow-up Submission	Complete Remission/Response	7		No	YES	Core needle biopsy	Bilateral	NO	YES	12	10				NO	15	0	No	N0	T2c
TCGA-KK-A7B3-01A	NO		62	348.57.0	Nationwide Children's Hospital	TCGA-KK-A7B3-F70519	6CE09083-47B2-44EB-96D8-67FD64F5F1BD	TCGA-KK-A7B3	NO		M0	T3a	22	24			112	294	0	294	637			NO		YES	00C3A9E4-1A83-476B-95B8-77344DACE67F	Scheduled Follow-up Submission	Complete Remission/Response	9		No	YES	Core needle biopsy	Bilateral	NO	YES	12	2		Biochemical evidence of disease		YES	17	0	Yes, History of Prior Malignancy	N0	T3b
TCGA-KK-A7B3-11A	NO		62	348.57.0	Nationwide Children's Hospital	TCGA-KK-A7B3-F70519	6CE09083-47B2-44EB-96D8-67FD64F5F1BD	TCGA-KK-A7B3	NO		M0	T3a	22	24			112	294	0	294	637			NO		YES	00C3A9E4-1A83-476B-95B8-77344DACE67F	Scheduled Follow-up Submission	Complete Remission/Response	9		No	YES	Core needle biopsy	Bilateral	NO	YES	12	2		Biochemical evidence of disease		YES	17	0	Yes, History of Prior Malignancy	N0	T3b
TCGA-CH-5753-01A			70	91.78.0	Nationwide Children's Hospital			TCGA-CH-5753	NO	Normal (no evidence of prostate cancer) [cM0]	M0		22		31	31			0		31			YES	No Evidence of Extraprostatic Extension	NO	FEB4DFE7-01C0-4E2D-8637-3E2E182C0DA1			9		No	YES	Core needle biopsy	Bilateral		YES	12						10	3	Yes	N1	T3b
TCGA-G9-7519-01A			58	221.78.0	Nationwide Children's Hospital	TCGA-G9-7519-F48751	B90BEDF2-021C-431E-914C-C567EF7E268A	TCGA-G9-7519	NO	Abnormal (not related to prostate cancer)	M0	T1c	22	20	7	7			0		457			YES	No Evidence of Extraprostatic Extension	NO	2F758D92-F705-4963-8D88-03CDF71B7F4A	Scheduled Follow-up Submission	Complete Remission/Response	7		No	YES	Core needle biopsy	Bilateral	NO	NO	12	9				NO			No		T2c
TCGA-V1-A9Z8-01A			59	429.43.0	Nationwide Children's Hospital	TCGA-V1-A9Z8-F70269	DD8F1149-AD73-4C8D-A0FB-3842C89F214B	TCGA-V1-A9Z8	NO		M0		22	2							181			NO		NO	BD472179-81C3-47B7-ADBB-AC05B5010C84	Scheduled Follow-up Submission	Complete Remission/Response	9		No	YES	Core needle biopsy	Bilateral	NO	YES	12	2					18	0	No	N0	T3b
TCGA-HC-7818-01A			66	184.82.0	Nationwide Children's Hospital	TCGA-HC-7818-F64380	90AC9736-C948-497A-8CCE-32EA9B55C381	TCGA-HC-7818			M0	T2b	22	29					0		99						EECE758C-EBC7-4F96-8C16-EE0A751A341E	Scheduled Follow-up Submission	Complete Remission/Response	7		No	YES	Core needle biopsy	Bilateral	NO	YES	12	8				NO	6	0	No	N0	T2c
TCGA-G9-6338-01A			61	161.76.0	Nationwide Children's Hospital	TCGA-G9-6338-F40677	54808F10-B333-4A14-ABD2-15803B4980F4	TCGA-G9-6338		Normal (no evidence of prostate cancer) [cM0]	M0	T1c	22	8	13	82			0		1634			YES	No Evidence of Extraprostatic Extension	NO	80C240FF-C9E1-4BF4-B8E1-53DA3B03AFA8	Scheduled Follow-up Submission	Complete Remission/Response	7		No	YES	Core needle biopsy	Bilateral	NO	YES	12	3				NO	2	0	No	N0	T3a
TCGA-CH-5765-01A			55	91.78.0	Nationwide Children's Hospital	TCGA-CH-5765-F28995	a35e8791-c35a-4c44-831c-0466098def97	TCGA-CH-5765	NO	Normal (no evidence of prostate cancer) [cM0]	M0		22	15	31	31			0		694			YES	No Evidence of Extraprostatic Extension	NO	B39AC952-235B-48E6-9F58-10B0A317F7FC	Scheduled Follow-up Submission	Complete Remission/Response	7		No	YES	Core needle biopsy	Bilateral		YES	12	2				NO	7	0	No	N0	T3a
TCGA-CH-5765-11A			55	91.78.0	Nationwide Children's Hospital	TCGA-CH-5765-F28995	a35e8791-c35a-4c44-831c-0466098def97	TCGA-CH-5765	NO	Normal (no evidence of prostate cancer) [cM0]	M0		22	15	31	31			0		694			YES	No Evidence of Extraprostatic Extension	NO	B39AC952-235B-48E6-9F58-10B0A317F7FC	Scheduled Follow-up Submission	Complete Remission/Response	7		No	YES	Core needle biopsy	Bilateral		YES	12	2				NO	7	0	No	N0	T3a
TCGA-G9-6361-01A			61	161.76.0	Nationwide Children's Hospital	TCGA-G9-6361-F42767	1761188B-E9CA-497D-B6CA-12B60A16C039	TCGA-G9-6361	NO	Normal (no evidence of prostate cancer) [cM0]	M0	T2c	22	30	38	31			0		1002			YES	No Evidence of Extraprostatic Extension	NO	03F2D100-6C08-4BF7-B2CB-B033C6B97F2B	Scheduled Follow-up Submission	Complete Remission/Response	7		No	YES	Core needle biopsy	Bilateral	NO	YES	12	4				NO	12	0	No	N0	T3a
TCGA-EJ-A7NG-01A			64	348.57.0	Nationwide Children's Hospital	TCGA-EJ-A7NG-F64725	CC2C68DB-948A-4390-848B-46BD174D4B93	TCGA-EJ-A7NG	NO		M0	T3a	22	10					0		264						CC704EBD-689D-4DD2-8D5B-5CFFF4BEBF7C	Scheduled Follow-up Submission	Complete Remission/Response	7		No	YES	Core needle biopsy	Bilateral	NO	YES	12	9				NO	6	0	No	N0	T3a
TCGA-CH-5744-01A			64	91.78.0	Nationwide Children's Hospital			TCGA-CH-5744	NO	Normal (no evidence of prostate cancer) [cM0]	M0		22		60	60			0		48			YES	No Evidence of Extraprostatic Extension	NO	7B247DEF-FF0F-4209-A133-977C0203AC96			7		No	YES	Core needle biopsy	Bilateral		YES	12						3	0	No	N0	T2c
TCGA-VN-A943-01A			71	429.43.0	Nationwide Children's Hospital	TCGA-VN-A943-F69100	0AF7CBD8-6DCE-418C-9100-08D6449DB32E	TCGA-VN-A943	NO		M0	T1c	22	29			-17		0		132			NO		YES	4E60DD22-0D80-4AC7-B123-98D27120C7B7	Scheduled Follow-up Submission	Complete Remission/Response	8		No	YES	Core needle biopsy	Bilateral	NO	YES	12	12				NO	10	0	No	N0	T2c
TCGA-G9-6365-01A			71	108.76.0	Nationwide Children's Hospital	TCGA-G9-6365-F42754	F3FB1C2B-8EF8-4F25-B58F-DFE82B3EC43C	TCGA-G9-6365	NO			T2a	22	30					0		804			NO		NO	315CFEF4-6113-4761-90F1-0F0D14EF291B	Scheduled Follow-up Submission	Complete Remission/Response	7		No	YES	Core needle biopsy	Bilateral	NO	YES	12	4				NO	13	0	No	N0	T4
TCGA-G9-6365-11A			71	108.76.0	Nationwide Children's Hospital	TCGA-G9-6365-F42754	F3FB1C2B-8EF8-4F25-B58F-DFE82B3EC43C	TCGA-G9-6365	NO			T2a	22	30					0		804			NO		NO	315CFEF4-6113-4761-90F1-0F0D14EF291B	Scheduled Follow-up Submission	Complete Remission/Response	7		No	YES	Core needle biopsy	Bilateral	NO	YES	12	4				NO	13	0	No	N0	T4
TCGA-EJ-7317-01A			71	184.82.0	Nationwide Children's Hospital	TCGA-EJ-7317-F64809	20B85B28-17AE-48FC-A8C1-F94639B243B1	TCGA-EJ-7317	NO		M0	T1c	22	11					0		285						E6AAE6DC-2DCE-4860-B2FD-E016D782AE97	Scheduled Follow-up Submission	Complete Remission/Response	7		No	YES	Core needle biopsy	Bilateral	NO	YES	12	9				NO	40	0	No	N0	T2c
TCGA-EJ-7317-11A			71	184.82.0	Nationwide Children's Hospital	TCGA-EJ-7317-F64809	20B85B28-17AE-48FC-A8C1-F94639B243B1	TCGA-EJ-7317	NO		M0	T1c	22	11					0		285						E6AAE6DC-2DCE-4860-B2FD-E016D782AE97	Scheduled Follow-up Submission	Complete Remission/Response	7		No	YES	Core needle biopsy	Bilateral	NO	YES	12	9				NO	40	0	No	N0	T2c
TCGA-EJ-7218-01B			71	331.61.0	Nationwide Children's Hospital	TCGA-EJ-7218-F64802	6B3C78A3-F4E0-4E4A-B121-E6ACBC4A4551	TCGA-EJ-7218	NO		M0	T2a	22	11					0		1473						057E7FD4-A6F0-4875-9067-240DC7B78397	Scheduled Follow-up Submission	Complete Remission/Response	7		No	YES	Core needle biopsy	Bilateral	NO	YES	12	9				NO	3	0	No	N0	T2c
TCGA-CH-5750-01A			72	91.78.0	Nationwide Children's Hospital	TCGA-CH-5750-F29002	e1cba76b-72f8-4f39-adc2-c7defb3f66dc	TCGA-CH-5750	NO	Normal (no evidence of prostate cancer) [cM0]	M0		22	15	31	31			0		337			YES	No Evidence of Extraprostatic Extension	NO	CAE0D4A3-44DE-4C6C-8AEE-56CB225D98B2	Scheduled Follow-up Submission	Complete Remission/Response	7		No	YES	Core needle biopsy	Bilateral		YES	12	2				NO	7	0	No	N0	T2c
TCGA-2A-AAYF-01A			57	429.43.0	Nationwide Children's Hospital	TCGA-2A-AAYF-F71830	F16D469B-D8E9-4719-BAF8-5C0BFBD68D3C	TCGA-2A-AAYF	NO		M0	T1c	22	31			186		0		972			NO		YES	E7A83F64-D527-4BC2-ABF7-9435FFE54E3E	Scheduled Follow-up Submission	Complete Remission/Response	7		No	YES	Core needle biopsy	Right	NO	NO	12	3				NO			No		T3a
TCGA-KK-A8I6-01A			58	370.53.0	Nationwide Children's Hospital			TCGA-KK-A8I6	NO	Normal (no evidence of prostate cancer) [cM0]	M0	T2b	22		-14	-13	17		0		668			YES	No Evidence of Extraprostatic Extension	YES	02E300A8-75CB-4380-81BB-FC6B3DF446B4			7		No	YES	Core needle biopsy	Bilateral		YES	12						23	0	No	N0	T3a
TCGA-KK-A8I6-11A			58	370.53.0	Nationwide Children's Hospital			TCGA-KK-A8I6	NO	Normal (no evidence of prostate cancer) [cM0]	M0	T2b	22		-14	-13	17		0		668			YES	No Evidence of Extraprostatic Extension	YES	02E300A8-75CB-4380-81BB-FC6B3DF446B4			7		No	YES	Core needle biopsy	Bilateral		YES	12						23	0	No	N0	T3a
TCGA-J9-A52C-01A			57	285.66.0	Nationwide Children's Hospital			TCGA-J9-A52C	NO	Normal (no evidence of prostate cancer) [cM0]		T1c	22		38	62			0		178			YES	No Evidence of Extraprostatic Extension	NO	8D442291-5130-4AE2-97F8-C41E9AA59655			9		No	YES	Core needle biopsy	Bilateral		NO	12								No		T3b
TCGA-YL-A8HM-01A			66	370.53.0	Nationwide Children's Hospital	TCGA-YL-A8HM-F67260	2D5BA7A4-AEFE-414E-8556-76B1E0614FC8	TCGA-YL-A8HM	NO	Normal (no evidence of prostate cancer) [cM0]	M0		22	3	26			1473	0	1473	1124			NO		NO	455A92DA-F704-4AA0-8D5E-C75669965832	Additional New Tumor Event		9		No	YES	Core needle biopsy	Bilateral	NO	YES	12	11		Biochemical evidence of disease		YES	10	0	No	N0	T3b
TCGA-MG-AAMC-01A			59	429.43.0	Nationwide Children's Hospital	TCGA-MG-AAMC-F68686	0A0E8852-D3A2-4E17-9F0F-5B004728029E	TCGA-MG-AAMC	NO		M0	T1c	22	9					0		54						E310A2E8-582D-4FFF-B2B9-93F88399124C	Scheduled Follow-up Submission		9		No	YES	Core needle biopsy		YES		12	1							No	N0	T3a
TCGA-M7-A724-01A			64	331.61.0	Nationwide Children's Hospital	TCGA-M7-A724-F70042	69998893-CD14-4D80-AEFC-6C53A285F366	TCGA-M7-A724	NO	Abnormal (not related to prostate cancer)	M0	T1c	22	26	11	35			0		483			YES	No Evidence of Extraprostatic Extension	NO	19A02262-6BA2-4F55-9703-57B7EF32C7CC	Scheduled Follow-up Submission	Complete Remission/Response	8		No	YES	Core needle biopsy	Right	NO	YES	12	1				YES	7	0	No	N0	T3a
TCGA-KK-A8IM-01A			55	370.53.0	Nationwide Children's Hospital	TCGA-KK-A8IM-F70533	C44F5680-4BA0-499C-BF57-CFFAD7AB2FE1	TCGA-KK-A8IM	NO		M0	T2a	22	24					0		1438			NO		NO	074E05F0-E6C9-4F8A-B4A4-ACF3536EF276	Scheduled Follow-up Submission	Complete Remission/Response	7		No	YES	Core needle biopsy	Bilateral	NO	YES	12	2				NO	5		No	N0	T2c
TCGA-KK-A8IM-11A			55	370.53.0	Nationwide Children's Hospital	TCGA-KK-A8IM-F70533	C44F5680-4BA0-499C-BF57-CFFAD7AB2FE1	TCGA-KK-A8IM	NO		M0	T2a	22	24					0		1438			NO		NO	074E05F0-E6C9-4F8A-B4A4-ACF3536EF276	Scheduled Follow-up Submission	Complete Remission/Response	7		No	YES	Core needle biopsy	Bilateral	NO	YES	12	2				NO	5		No	N0	T2c
TCGA-G9-7509-01A			48	429.43.0	Nationwide Children's Hospital	TCGA-G9-7509-F65350	23D75A93-69B7-41F9-99BA-BE84FAA1BD46	TCGA-G9-7509	NO		M0	T1c	22	22					0		352			NO		NO	4D1DFC4D-4279-4AC1-BA3D-B3489AD9449D	Scheduled Follow-up Submission	Complete Remission/Response	6		No	YES	Core needle biopsy	Bilateral	NO	NO	12	9				NO			No		T2c
TCGA-VP-A87B-01A	YES	NO	63	357.55.0	Nationwide Children's Hospital	TCGA-VP-A87B-F64449	07E131B5-1B45-4E50-8B6E-CE425FB906F1	TCGA-VP-A87B	NO	Normal (no evidence of prostate cancer) [cM0]	M0	T1c	22	3				2310	0	2473	2309	2459		YES	No Evidence of Extraprostatic Extension	NO	80A746A0-DF9F-491B-860B-0E9F1575E64D	Scheduled Follow-up Submission	Complete Remission/Response	8		No	YES	Core needle biopsy	Right	NO	YES	12	9	Lung	New Primary Tumor		YES	2	0	No	N0	T2b
TCGA-KK-A7B2-01A	NO	NO	68	331.61.0	Nationwide Children's Hospital	TCGA-KK-A7B2-F70518	C6280C51-59B7-460A-A73C-2115C8A5552B	TCGA-KK-A7B2	NO	Normal (no evidence of prostate cancer) [cM0]	M0	T1c	22	24	58	58		692	0	692	845			YES	No Evidence of Extraprostatic Extension	NO	D0CF0307-0B1F-4488-B9B6-C0CF90230E1B	Scheduled Follow-up Submission	Stable Disease	9		No	YES	Core needle biopsy	Left	NO	YES	12	2		Biochemical evidence of disease		YES	13	1	No	N1	T3a
TCGA-KK-A7B2-11A	NO	NO	68	331.61.0	Nationwide Children's Hospital	TCGA-KK-A7B2-F70518	C6280C51-59B7-460A-A73C-2115C8A5552B	TCGA-KK-A7B2	NO	Normal (no evidence of prostate cancer) [cM0]	M0	T1c	22	24	58	58		692	0	692	845			YES	No Evidence of Extraprostatic Extension	NO	D0CF0307-0B1F-4488-B9B6-C0CF90230E1B	Scheduled Follow-up Submission	Stable Disease	9		No	YES	Core needle biopsy	Left	NO	YES	12	2		Biochemical evidence of disease		YES	13	1	No	N1	T3a
TCGA-EJ-5507-01A			54	91.78.0	Nationwide Children's Hospital	TCGA-EJ-5507-F46208	5A965AB0-241A-4188-9526-23359A1829F6	TCGA-EJ-5507	NO		M0	T2c	22	3					0		182			NO		NO	A5412427-7433-4D43-936C-97BD0692D9E1	Scheduled Follow-up Submission	Complete Remission/Response	9		No	YES	Core needle biopsy	Bilateral	NO	YES	12	8				NO	21	2	No	N1	T3b
TCGA-V1-A9ZI-01A	NO	NO	68	429.43.0	Nationwide Children's Hospital	TCGA-V1-A9ZI-F70259	43480C8B-C273-4CCA-BD89-A38F9288CB53	TCGA-V1-A9ZI	YES		M0		22	2		40		86			86			YES	No Evidence of Extraprostatic Extension	NO	B0D143B7-A24F-43AF-A4A6-4FD1ABDFB7F5	Scheduled Follow-up Submission		9		No	YES	Core needle biopsy	Bilateral	NO	YES	12	2		Biochemical evidence of disease		YES	10	0	No	N0	T3b
TCGA-KK-A8IK-01A			56	370.53.0	Nationwide Children's Hospital	TCGA-KK-A8IK-F70532	8DC51F14-30B2-401F-A761-53D59C98E99D	TCGA-KK-A8IK	NO	Abnormal (not related to prostate cancer)	M0	T1c	22	24	-69	-69			0					YES	No Evidence of Extraprostatic Extension	NO	C9B8E2A4-6065-4A4C-89E1-78E2D5BB08C2	Scheduled Follow-up Submission		9		No	YES	Core needle biopsy	Bilateral	NO	YES	12	2					6		No	N0	T2c
TCGA-KK-A8IK-11A			56	370.53.0	Nationwide Children's Hospital	TCGA-KK-A8IK-F70532	8DC51F14-30B2-401F-A761-53D59C98E99D	TCGA-KK-A8IK	NO	Abnormal (not related to prostate cancer)	M0	T1c	22	24	-69	-69			0					YES	No Evidence of Extraprostatic Extension	NO	C9B8E2A4-6065-4A4C-89E1-78E2D5BB08C2	Scheduled Follow-up Submission		9		No	YES	Core needle biopsy	Bilateral	NO	YES	12	2					6		No	N0	T2c
TCGA-EJ-5495-01A			68	91.78.0	Nationwide Children's Hospital	TCGA-EJ-5495-F46197	BDDE4025-238B-40A9-BCBC-9892909359FA	TCGA-EJ-5495	NO	Normal (no evidence of prostate cancer) [cM0]	M0	T1c	22	3	26				0		606			NO		NO	793C267C-7319-405C-B81E-C2672D7FFC7F	Scheduled Follow-up Submission	Complete Remission/Response	8		No	YES	Core needle biopsy	Bilateral	NO	YES	12	8				NO	18	1	No	N1	T3b
TCGA-G9-6339-01A			58	315.66.0	Nationwide Children's Hospital	TCGA-G9-6339-F65344	5F2B0848-198E-4EA1-9405-101CE75518A6	TCGA-G9-6339	NO	Normal (no evidence of prostate cancer) [cM0]	M0	T3b	22	22	4				0		2110			NO		NO	9D10077A-BF11-4769-8142-7C497AB87E2D	Scheduled Follow-up Submission	Complete Remission/Response	7		No	YES	Core needle biopsy	Bilateral	NO	YES	12	9				NO	6	0	No	N0	T3b
TCGA-EJ-5511-01A			55	91.78.0	Nationwide Children's Hospital	TCGA-EJ-5511-F46212	605601F3-5B35-4B44-A624-69F181F52772	TCGA-EJ-5511	NO	Normal (no evidence of prostate cancer) [cM0]	M0	T2b	22	3	18				0		788			NO		NO	332921A6-712B-4CBA-945A-787317ED992A	Scheduled Follow-up Submission	Complete Remission/Response	7		No	YES	Core needle biopsy	Bilateral	NO	YES	12	8				NO	15	0	No	N0	T3a
TCGA-J4-A67R-01A			65	312.65.0	Nationwide Children's Hospital	TCGA-J4-A67R-F63916	DD1FCC3D-165D-4271-9562-5AC55058746E	TCGA-J4-A67R	NO		M0	T1c	22	21					0		454						DF24E0CB-BECE-49C1-84BC-A81DFB16159E	Scheduled Follow-up Submission	Complete Remission/Response	7		No	YES	Core needle biopsy	Bilateral	NO	YES	12	8				NO	4	0	No	N0	T2c
TCGA-VP-A87E-01A			59	357.55.0	Nationwide Children's Hospital	TCGA-VP-A87E-F64474	947FE463-89EE-416C-8207-C381A95E35ED	TCGA-VP-A87E	NO	Normal (no evidence of prostate cancer) [cM0]	M0	T1c	22	3	15	15			0		2037			YES	No Evidence of Extraprostatic Extension	NO	7FF2A2DF-17D6-4771-9EAB-8304A26ACE0A	Scheduled Follow-up Submission	Complete Remission/Response	6		No	YES	Core needle biopsy	Bilateral	YES	YES	12	9				NO	12	0	No	N0	T2c
TCGA-YL-A8SB-01A	YES	NO	62	389.51.0	Nationwide Children's Hospital	TCGA-YL-A8SB-F67264	B7E332B2-9C59-4158-97D9-68A4A1C1F6E6	TCGA-YL-A8SB	NO	Normal (no evidence of prostate cancer) [cM0]	M0		22	3	27	52		1384	0	1384	1384			YES	No Evidence of Extraprostatic Extension	NO	8591E1F6-C80C-46B6-A485-4564076F3170	Scheduled Follow-up Submission		9		No	YES	Core needle biopsy	Bilateral	NO	YES	12	11		Biochemical evidence of disease		YES	3	0	No	N0	T3a
TCGA-G9-6373-01A			68	108.76.0	Nationwide Children's Hospital	TCGA-G9-6373-F40635	3455E905-2699-41BC-86AB-014F85F21B93	TCGA-G9-6373		Normal (no evidence of prostate cancer) [cM0]	M0	T2b	22	26	29				0					NO		NO	967514DF-8782-4733-A328-0E7AA205786D	Scheduled Follow-up Submission	Complete Remission/Response	7		No	YES	Core needle biopsy	Bilateral	NO	NO	12	2				NO			No		T3a
TCGA-G9-6373-11A			68	108.76.0	Nationwide Children's Hospital	TCGA-G9-6373-F40635	3455E905-2699-41BC-86AB-014F85F21B93	TCGA-G9-6373		Normal (no evidence of prostate cancer) [cM0]	M0	T2b	22	26	29				0					NO		NO	967514DF-8782-4733-A328-0E7AA205786D	Scheduled Follow-up Submission	Complete Remission/Response	7		No	YES	Core needle biopsy	Bilateral	NO	NO	12	2				NO			No		T3a
TCGA-EJ-7789-01A			66	184.82.0	Nationwide Children's Hospital	TCGA-EJ-7789-F48961	76CFC48F-508A-457C-B637-F279B0EB9C07	TCGA-EJ-7789			M0	T1c	22	24					0					NO		NO	18BB06CF-6B1A-4717-A44B-5313B1A843DE	Scheduled Follow-up Submission	Complete Remission/Response	7		No	YES	Core needle biopsy	Bilateral	NO	YES	12	9				NO	14	0	No	N0	T3a
TCGA-EJ-7789-11A			66	184.82.0	Nationwide Children's Hospital	TCGA-EJ-7789-F48961	76CFC48F-508A-457C-B637-F279B0EB9C07	TCGA-EJ-7789			M0	T1c	22	24					0					NO		NO	18BB06CF-6B1A-4717-A44B-5313B1A843DE	Scheduled Follow-up Submission	Complete Remission/Response	7		No	YES	Core needle biopsy	Bilateral	NO	YES	12	9				NO	14	0	No	N0	T3a
TCGA-CH-5743-01A	NO	NO	66	91.78.0	Nationwide Children's Hospital	TCGA-CH-5743-F29001	d0ad1d26-d82c-46e5-a36c-cf0f037c6749	TCGA-CH-5743	NO	Normal (no evidence of prostate cancer) [cM0]	M0		22	15	29	29			0	425	394			YES	No Evidence of Extraprostatic Extension	NO	4633F6B7-27ED-435E-ABFC-608D0091A2CA	Scheduled Follow-up Submission	Complete Remission/Response	7		No	YES	Core needle biopsy	Bilateral		YES	12	2		New Primary Tumor		YES	1	0	No	N0	T2c
TCGA-EJ-5518-01A			66	91.78.0	Nationwide Children's Hospital	TCGA-EJ-5518-F46602	D311FAB1-0154-4BF9-97BE-D6C7C505103D	TCGA-EJ-5518	NO	Normal (no evidence of prostate cancer) [cM0]	M0	T3b	22	12	32				0		1195			NO		NO	95461DE7-E309-4505-9A53-8B369CC7BEC4	Scheduled Follow-up Submission	Complete Remission/Response	9		No	YES	Core needle biopsy	Bilateral	NO		12	8				NO	3	0	No	N0	T4
TCGA-VN-A88M-01A			55	357.55.0	Nationwide Children's Hospital	TCGA-VN-A88M-F62591	AD447899-F3E2-4D8E-B180-0360EF2FDD31	TCGA-VN-A88M			M0	T1c	22	22			128		0					NO		YES	29BC986B-1696-4812-81E3-82274A0CECDF	Scheduled Follow-up Submission		7		No	YES	Core needle biopsy	Bilateral	YES	YES	12	12					13	0	No	N0	T2c
TCGA-ZG-A9L9-01A			60	429.43.0	Nationwide Children's Hospital	TCGA-ZG-A9L9-F67816	A4E660B9-AF67-4704-B991-FC0854BCA7D9	TCGA-ZG-A9L9	NO	Normal (no evidence of prostate cancer) [cM0]	M0	T2b	22	12	-4		0		0					NO		YES	2979951D-EA4D-4834-AADC-295C2376761A	Scheduled Follow-up Submission	Stable Disease	9		No	YES	Core needle biopsy	Bilateral	NO	YES	12	11				NO	15	3	No	N1	T3b
TCGA-EJ-A7NF-01A			56	348.57.0	Nationwide Children's Hospital	TCGA-EJ-A7NF-F64724	3B23E486-1F84-47DF-B24F-B06F3247B2A4	TCGA-EJ-A7NF	NO		M0	T2c	22	10					0		117						629AD97A-E47B-4134-A506-32089B9252A4	Scheduled Follow-up Submission	Complete Remission/Response	7		No	YES	Transurethral resection (TURBT)	Bilateral	NO	YES	12	9				NO	29	0	No	N0	T2c
TCGA-HC-A48F-01A			47	268.67.0	Nationwide Children's Hospital	TCGA-HC-A48F-F64404	7C656AC0-DE77-4DE8-A68E-81ECA6812B60	TCGA-HC-A48F		Normal (no evidence of prostate cancer) [cM0]	M0	T1c	22	29	29	30			0					YES	No Evidence of Extraprostatic Extension	NO	0C74EF1C-0EB4-43F7-AECA-F5F55D2FA78E	Scheduled Follow-up Submission	Complete Remission/Response	8		No	YES	Core needle biopsy	Bilateral	NO	YES	12	8				NO	10	1	No	N1	T2c
TCGA-YL-A8HO-01A	NO	YES	67	370.53.0	Nationwide Children's Hospital	TCGA-YL-A8HO-F57520	2DB7C9BA-9046-4325-8F4A-E2FDCFABEF75	TCGA-YL-A8HO	NO	Abnormal (not related to prostate cancer)	M0		22	13	62	117		1068	0	1068	2168			YES	No Evidence of Extraprostatic Extension	NO	341B61E3-AC0A-4FD0-9922-0B0EE5695E45	Scheduled Follow-up Submission	Stable Disease	7		No	YES	Core needle biopsy	Bilateral	NO	YES	12	3		Biochemical evidence of disease		YES	18	0	No	N0	T3a
TCGA-HC-7740-01A			59	184.82.0	Nationwide Children's Hospital	TCGA-HC-7740-F48772	E64A5417-963E-4A44-ADC6-EC7530551A94	TCGA-HC-7740			M0	T2a	22	20					0		154						98BFC722-BE2E-442E-83B0-AB7982AF5BCC	Scheduled Follow-up Submission	Complete Remission/Response	7		No	YES	Core needle biopsy	Bilateral	NO	YES	12	9				NO	4	0	No	N0	T2c
TCGA-HC-7740-01B			59	184.82.0	Nationwide Children's Hospital	TCGA-HC-7740-F48772	E64A5417-963E-4A44-ADC6-EC7530551A94	TCGA-HC-7740			M0	T2a	22	20					0		154						98BFC722-BE2E-442E-83B0-AB7982AF5BCC	Scheduled Follow-up Submission	Complete Remission/Response	7		No	YES	Core needle biopsy	Bilateral	NO	YES	12	9				NO	4	0	No	N0	T2c
TCGA-HC-7740-11A			59	184.82.0	Nationwide Children's Hospital	TCGA-HC-7740-F48772	E64A5417-963E-4A44-ADC6-EC7530551A94	TCGA-HC-7740			M0	T2a	22	20					0		154						98BFC722-BE2E-442E-83B0-AB7982AF5BCC	Scheduled Follow-up Submission	Complete Remission/Response	7		No	YES	Core needle biopsy	Bilateral	NO	YES	12	9				NO	4	0	No	N0	T2c
TCGA-Y6-A8TL-01A			65	389.51.0	Nationwide Children's Hospital	TCGA-Y6-A8TL-F68020	13C0D784-F5D3-4CD8-AB96-854B3CB0B08B	TCGA-Y6-A8TL	NO			T2a	22	13		328			0		775			YES	No Evidence of Extraprostatic Extension	NO	71DB735B-D0C2-42C9-A0A8-79CF559EEA1E	Scheduled Follow-up Submission	Complete Remission/Response	6		No	YES	Core needle biopsy	Right	NO	YES	12	11				NO	5	0	No	N0	T3a
TCGA-HC-A631-01A			67	308.70.0	Nationwide Children's Hospital			TCGA-HC-A631		Normal (no evidence of prostate cancer) [cM0]	M0	T2	22		25	21			0					YES	No Evidence of Extraprostatic Extension		F5E88366-79E3-4E9C-9B30-405B9484328C			9		No	YES	Core needle biopsy	Bilateral		YES	12						2	0	No	N0	T2c
TCGA-EJ-5521-01A			63	91.78.0	Nationwide Children's Hospital	TCGA-EJ-5521-F46758	9A76EFB5-E2D0-436E-9E6D-09BECE73151B	TCGA-EJ-5521	NO		M0	T1c	22	16					0		240			NO		NO	87DCCBC3-CA67-4EB7-87BB-38213602421B	Scheduled Follow-up Submission	Complete Remission/Response	7		No	YES	Core needle biopsy	Right	NO	YES	12	8				NO	2	0	No	N0	T3a
TCGA-G9-6354-01A			55	315.66.0	Nationwide Children's Hospital	TCGA-G9-6354-F65349	3EDEFE5A-D546-4B4C-B7A9-6492740623A4	TCGA-G9-6354	NO		M0	T1c	22	22					0		525			NO		NO	7077ED79-485D-46A2-8989-994CE0EBE8A1	Scheduled Follow-up Submission	Complete Remission/Response	7		No	YES	Core needle biopsy	Right	NO	NO	12	9				NO			No		T2b
TCGA-EJ-5515-01A			60	91.78.0	Nationwide Children's Hospital	TCGA-EJ-5515-F46599	6F0AF56C-8A7E-4EF8-B7F8-812CFFADFAD1	TCGA-EJ-5515	NO	Normal (no evidence of prostate cancer) [cM0]	M0	T1c	22	12	30	30			0		1061			YES	No Evidence of Extraprostatic Extension	NO	B73CF8B2-2863-40D7-A75A-5A894D417779	Scheduled Follow-up Submission	Complete Remission/Response	7		No	YES	Core needle biopsy	Right	NO	YES	12	8				NO	20	0	No	N0	T3a
TCGA-V1-A8MU-01A	YES	YES	56	389.51.0	Nationwide Children's Hospital	TCGA-V1-A8MU-F69444	76B9C0ED-4286-4EE5-9142-654D3642A6DB	TCGA-V1-A8MU	NO		M0	T2b	22	9		87		192			1384			YES	No Evidence of Extraprostatic Extension	NO	3DE9A4BB-B191-415B-BC66-9F71813B80EA	Scheduled Follow-up Submission	Partial Remission/Response	7		No	YES	Core needle biopsy	Bilateral	NO	YES	12	1		Biochemical evidence of disease		YES	15	1	No	N1	T3a
TCGA-EJ-A65E-01A			67	308.70.0	Nationwide Children's Hospital	TCGA-EJ-A65E-F64717	3888C0E5-A120-456D-ADDC-A851C9D14961	TCGA-EJ-A65E	NO		M0	T3b	22	10					0		254						6FF7777B-886F-4809-AF84-CC280AB21083	Scheduled Follow-up Submission	Complete Remission/Response	7	mixed	No	YES	Core needle biopsy	Bilateral	NO	YES	12	9				NO	23	0	No	N0	T3b
TCGA-EJ-A46F-01A			57	268.67.0	Nationwide Children's Hospital	TCGA-EJ-A46F-F64645	5B76A097-5637-447A-B4D0-0076D6C38C38	TCGA-EJ-A46F	YES	Normal (no evidence of prostate cancer) [cM0]	M0	T2c	22	8	166	166			0		215			YES			9F2A0E8D-C605-481F-9B3F-D1F4979E6C71	Scheduled Follow-up Submission	Complete Remission/Response	8		No	YES	Core needle biopsy	Bilateral	NO	YES	12	9				NO	23	1	No	N1	T3b
TCGA-HC-8265-01A			66	221.78.0	Nationwide Children's Hospital	TCGA-HC-8265-F48767	29ED9046-FC1D-472C-98E0-5B1CB214210F	TCGA-HC-8265	NO				22	20					0		119						51F9FDEE-D2B3-425C-9D0F-BE6DEAEBF7FF	Scheduled Follow-up Submission	Complete Remission/Response	8		No	YES	Core needle biopsy	Bilateral	NO	YES	12	9				NO	8	0	No	N0	T3a
TCGA-HC-8265-01B			66	221.78.0	Nationwide Children's Hospital	TCGA-HC-8265-F48767	29ED9046-FC1D-472C-98E0-5B1CB214210F	TCGA-HC-8265	NO				22	20					0		119						51F9FDEE-D2B3-425C-9D0F-BE6DEAEBF7FF	Scheduled Follow-up Submission	Complete Remission/Response	8		No	YES	Core needle biopsy	Bilateral	NO	YES	12	9				NO	8	0	No	N0	T3a
TCGA-HC-8265-11A			66	221.78.0	Nationwide Children's Hospital	TCGA-HC-8265-F48767	29ED9046-FC1D-472C-98E0-5B1CB214210F	TCGA-HC-8265	NO				22	20					0		119						51F9FDEE-D2B3-425C-9D0F-BE6DEAEBF7FF	Scheduled Follow-up Submission	Complete Remission/Response	8		No	YES	Core needle biopsy	Bilateral	NO	YES	12	9				NO	8	0	No	N0	T3a
TCGA-XJ-A83H-01A			57	357.55.0	Nationwide Children's Hospital	TCGA-XJ-A83H-F66192	100B474F-60B4-4954-93B6-4A2441AFB65C	TCGA-XJ-A83H	NO		M0	T2a	22	3					0		1280			NO		NO	E9594ECD-9780-46B4-9B6A-D0D0F0612A35	Scheduled Follow-up Submission		7		No	YES	Core needle biopsy	Bilateral	YES	NO	12	10							No		T2c
TCGA-EJ-A8FO-01A			51	370.53.0	Nationwide Children's Hospital	TCGA-EJ-A8FO-F64781	1EFA98F9-2839-463B-A396-F9AB54294977	TCGA-EJ-A8FO	NO		M0	T3a	22	11					0		156						F7F88CF3-A6C9-40B2-B42D-6A7CDB2F9FF4	Scheduled Follow-up Submission	Complete Remission/Response	7	acinar and ductal	No	YES	Core needle biopsy	Bilateral	NO	YES	12	9				NO	37	0	No	N0	T3a
TCGA-EJ-A8FO-11A			51	370.53.0	Nationwide Children's Hospital	TCGA-EJ-A8FO-F64781	1EFA98F9-2839-463B-A396-F9AB54294977	TCGA-EJ-A8FO	NO		M0	T3a	22	11					0		156						F7F88CF3-A6C9-40B2-B42D-6A7CDB2F9FF4	Scheduled Follow-up Submission	Complete Remission/Response	7	acinar and ductal	No	YES	Core needle biopsy	Bilateral	NO	YES	12	9				NO	37	0	No	N0	T3a
TCGA-KK-A7B4-01A	NO	NO	64	331.61.0	Nationwide Children's Hospital	TCGA-KK-A7B4-F70523	36E917F5-4CF4-4E11-8793-C253088C2DD4	TCGA-KK-A7B4	YES	Equivocal	M0	T3b	22	24	29		29	637	0	963	637			NO		YES	511F5D0A-6D0B-4AA6-A368-9919169F4043	Scheduled Follow-up Submission	Progressive Disease	9		No	YES	Core needle biopsy	Bilateral	NO	YES	12	2	Bone	Locoregional Recurrence		YES	20	8	Yes, History of Prior Malignancy	N1	T3b
TCGA-KK-A7B4-11A	NO	NO	64	331.61.0	Nationwide Children's Hospital	TCGA-KK-A7B4-F70523	36E917F5-4CF4-4E11-8793-C253088C2DD4	TCGA-KK-A7B4	YES	Equivocal	M0	T3b	22	24	29		29	637	0	963	637			NO		YES	511F5D0A-6D0B-4AA6-A368-9919169F4043	Scheduled Follow-up Submission	Progressive Disease	9		No	YES	Core needle biopsy	Bilateral	NO	YES	12	2	Bone	Locoregional Recurrence		YES	20	8	Yes, History of Prior Malignancy	N1	T3b
TCGA-YL-A8SC-01A			66	389.51.0	Nationwide Children's Hospital	TCGA-YL-A8SC-F58906	3D9DD876-D254-46BF-BA2E-76DFC12823DD	TCGA-YL-A8SC	NO	Normal (no evidence of prostate cancer) [cM0]	M0		22	27	40	47		152	0	152	1261			YES	No Evidence of Extraprostatic Extension	NO	DB8AB440-C031-4E87-B044-FBBE5EA1AB1D	Additional New Tumor Event	Partial Remission/Response	9		No	YES	Core needle biopsy	Bilateral	NO	YES	12	4		Biochemical evidence of disease		YES	6	0	No	N0	T3a
TCGA-V1-A9OA-01A			61	429.43.0	Nationwide Children's Hospital	TCGA-V1-A9OA-F69441	9C4B3F98-E06B-4DC3-BFFF-0E2174C0EA31	TCGA-V1-A9OA	NO		M0	T2c	22	9			27				510			NO		YES	812C6D4F-75F5-4578-8BF8-29E0BE59F3F4	Scheduled Follow-up Submission	Complete Remission/Response	9		No	YES	Core needle biopsy	Bilateral	NO	YES	12	1				NO	8	1	No	N1	T3b
TCGA-YL-A8SK-01B			67	389.51.0	Nationwide Children's Hospital	TCGA-YL-A8SK-F67551	6BBA0B3D-F4B8-4D0C-8559-FA65EAFD3D87	TCGA-YL-A8SK	NO	Normal (no evidence of prostate cancer) [cM0]	M0		22	6	38				0		924			NO		NO	50308BC2-6D25-4DBE-9FDA-8F166A91C351	Scheduled Follow-up Submission	Stable Disease	9		No	YES	Core needle biopsy	Bilateral	NO	YES	12	11				NO	20	4	No	N1	T3b
TCGA-EJ-7794-01A			67	184.82.0	Nationwide Children's Hospital	TCGA-EJ-7794-F48876	F0D67BEA-3FE9-4278-AC0C-C9F61DB9C81A	TCGA-EJ-7794	NO	Normal (no evidence of prostate cancer) [cM0]	M0	T2c	22	24	35	35			0		285			YES	No Evidence of Extraprostatic Extension	NO	D9FE1962-A255-439D-9B22-4E5CF50A50B9	Scheduled Follow-up Submission	Complete Remission/Response	7		No	YES	Core needle biopsy	Bilateral	NO	YES	12	9				NO	11	0	No	N0	T2c
TCGA-EJ-7794-11A			67	184.82.0	Nationwide Children's Hospital	TCGA-EJ-7794-F48876	F0D67BEA-3FE9-4278-AC0C-C9F61DB9C81A	TCGA-EJ-7794	NO	Normal (no evidence of prostate cancer) [cM0]	M0	T2c	22	24	35	35			0		285			YES	No Evidence of Extraprostatic Extension	NO	D9FE1962-A255-439D-9B22-4E5CF50A50B9	Scheduled Follow-up Submission	Complete Remission/Response	7		No	YES	Core needle biopsy	Bilateral	NO	YES	12	9				NO	11	0	No	N0	T2c
TCGA-HC-8262-01A			57	221.78.0	Nationwide Children's Hospital	TCGA-HC-8262-F48770	EDCF0F71-DDE1-4583-9122-B6263E751C40	TCGA-HC-8262	NO				22	20					0		112						1597E8AA-91C1-45BB-8C97-2A7C49053B3F	Scheduled Follow-up Submission	Complete Remission/Response	8		No	YES	Core needle biopsy	Bilateral	NO	YES	12	9				NO	8	0	No	N0	T2c
TCGA-HC-8262-11A			57	221.78.0	Nationwide Children's Hospital	TCGA-HC-8262-F48770	EDCF0F71-DDE1-4583-9122-B6263E751C40	TCGA-HC-8262	NO				22	20					0		112						1597E8AA-91C1-45BB-8C97-2A7C49053B3F	Scheduled Follow-up Submission	Complete Remission/Response	8		No	YES	Core needle biopsy	Bilateral	NO	YES	12	9				NO	8	0	No	N0	T2c
TCGA-QU-A6IP-01A			66	320.62.0	Nationwide Children's Hospital	TCGA-QU-A6IP-F66986	58B44286-9A41-4127-8363-5D7EACE27588	TCGA-QU-A6IP	NO		M0	T2a	22	31					0		2620			NO		NO	62664700-E0CB-4217-91BC-B194313FD784	Scheduled Follow-up Submission	Complete Remission/Response	6		No	YES	Core needle biopsy	Right	YES	YES	12	10				NO	2	0	No	N0	T2a
TCGA-ZG-A8QX-01A			56	389.51.0	Nationwide Children's Hospital	TCGA-ZG-A8QX-F67804	79ABFD01-902F-496A-9C2B-12F2A0E550E7	TCGA-ZG-A8QX			M0	T1c	22	12					0					NO		NO	EDF0B88D-F858-4212-8F41-EAC06C975BFB	Scheduled Follow-up Submission	Stable Disease	6		No	YES	Core needle biopsy	Bilateral	NO	YES	12	11				NO	18	0	No	N0	T2c
TCGA-G9-6499-01A			66	161.76.0	Nationwide Children's Hospital	TCGA-G9-6499-F41000	E8AFA069-F009-49FD-8C97-0C80EFAA2233	TCGA-G9-6499	NO	Equivocal	M0	T3a	22	8	56	421			0		1109			YES	No Evidence of Extraprostatic Extension	NO	1E109636-6174-48AE-B6F1-35205403B7A9	Scheduled Follow-up Submission	Complete Remission/Response	9		No	YES	Core needle biopsy	Bilateral	NO	YES	12	3				NO	13	0	No	N0	T3a
TCGA-G9-6499-11A			66	161.76.0	Nationwide Children's Hospital	TCGA-G9-6499-F41000	E8AFA069-F009-49FD-8C97-0C80EFAA2233	TCGA-G9-6499	NO	Equivocal	M0	T3a	22	8	56	421			0		1109			YES	No Evidence of Extraprostatic Extension	NO	1E109636-6174-48AE-B6F1-35205403B7A9	Scheduled Follow-up Submission	Complete Remission/Response	9		No	YES	Core needle biopsy	Bilateral	NO	YES	12	3				NO	13	0	No	N0	T3a
TCGA-EJ-7328-01A			70	184.82.0	Nationwide Children's Hospital	TCGA-EJ-7328-F64806	00C8611C-DC2F-4A9C-9157-5FBDD688327E	TCGA-EJ-7328			M0	T1c	22	11					0					NO		NO	F887DBEB-51FA-4128-B4EF-F2E9236FC614	Scheduled Follow-up Submission	Complete Remission/Response	7		No	YES	Core needle biopsy	Bilateral	NO	YES	12	9				NO	9	0	No	N0	T3a
TCGA-EJ-7328-11A			70	184.82.0	Nationwide Children's Hospital	TCGA-EJ-7328-F64806	00C8611C-DC2F-4A9C-9157-5FBDD688327E	TCGA-EJ-7328			M0	T1c	22	11					0					NO		NO	F887DBEB-51FA-4128-B4EF-F2E9236FC614	Scheduled Follow-up Submission	Complete Remission/Response	7		No	YES	Core needle biopsy	Bilateral	NO	YES	12	9				NO	9	0	No	N0	T3a
TCGA-EJ-A8FN-01A			58	357.55.0	Nationwide Children's Hospital	TCGA-EJ-A8FN-F64780	593F63D2-147A-4004-AB32-F1440DA3E772	TCGA-EJ-A8FN	NO		M0	T2c	22	11					0		203						A65476AB-D7E8-4CBF-AF4D-A32B7C13D9B7	Scheduled Follow-up Submission	Complete Remission/Response	7		No	YES	Core needle biopsy	Bilateral	NO	YES	12	9				NO	25	0	No	N0	T2c
TCGA-EJ-A6RA-01A			70	348.57.0	Nationwide Children's Hospital	TCGA-EJ-A6RA-F64722	C25B4A76-611E-4442-BCEA-B0E23BB36685	TCGA-EJ-A6RA	YES		M0	T3b	22	10					0		353						4A310F2B-0D24-492B-BECC-659FACDE4025	Scheduled Follow-up Submission	Complete Remission/Response	8		No	YES	Core needle biopsy	Bilateral	NO	YES	12	9				NO	18	1	No	N1	T3b
TCGA-J4-A67N-01A	NO	NO	61	312.65.0	Nationwide Children's Hospital	TCGA-J4-A67N-F59131	106C4E24-3BDF-4F9F-99CA-CD9FF2EE3995	TCGA-J4-A67N	YES		M0	T2a	22	20				442	0	442	503	503					BFF4D90D-AAA8-48F9-BABD-9E3304614B4D	Scheduled Follow-up Submission		7		No	YES	Core needle biopsy	Bilateral	NO	YES	12	8		Biochemical evidence of disease		YES	8	0	No	N0	T3a
TCGA-HC-A6AN-01A			67	312.65.0	Nationwide Children's Hospital			TCGA-HC-A6AN			M0	T1c	22						0								6E83BC30-0160-467D-B6CA-26BB7596B191			7		No	YES	Core needle biopsy	Bilateral		YES	12						1	0	No	N0	T3a
TCGA-EJ-7315-01A			68	184.82.0	Nationwide Children's Hospital	TCGA-EJ-7315-F64804	40E5CD58-D18F-44F5-8E54-39D942615820	TCGA-EJ-7315	NO		M0	T2a	22	11					0		289			NO		NO	1EE5F146-C5F5-4D1F-8FD3-12DCBBA900B5	Scheduled Follow-up Submission	Complete Remission/Response	7		No	YES	Core needle biopsy	Bilateral	NO	YES	12	9				NO	7	0	No	N0	T3a
TCGA-EJ-7315-11A			68	184.82.0	Nationwide Children's Hospital	TCGA-EJ-7315-F64804	40E5CD58-D18F-44F5-8E54-39D942615820	TCGA-EJ-7315	NO		M0	T2a	22	11					0		289			NO		NO	1EE5F146-C5F5-4D1F-8FD3-12DCBBA900B5	Scheduled Follow-up Submission	Complete Remission/Response	7		No	YES	Core needle biopsy	Bilateral	NO	YES	12	9				NO	7	0	No	N0	T3a
TCGA-KC-A7FD-01A			62	348.57.0	Nationwide Children's Hospital			TCGA-KC-A7FD	NO		M0	T1c	22			29	45		0		144			YES	No Evidence of Extraprostatic Extension	YES	91F70036-E2D4-4F7B-8710-F4D7875D273E			7		No	YES	Core needle biopsy	Bilateral		YES	12						16	0	No	N0	T3a
TCGA-EJ-A6RC-01A	NO	NO	64	331.61.0	Nationwide Children's Hospital	TCGA-EJ-A6RC-F64723	41776799-FB84-404A-937A-0616C66F870C	TCGA-EJ-A6RC	NO		M0	T1c	22	10					0		693						D791A853-8E38-4576-8B77-7B0AF35EF290	Scheduled Follow-up Submission	Complete Remission/Response	7		No	YES	Transurethral resection (TURBT)	Bilateral	NO	YES	12	9				NO	38	0	Yes, History of Prior Malignancy	N0
TCGA-EJ-5514-01A			66	91.78.0	Nationwide Children's Hospital	TCGA-EJ-5514-F46598	ADA7B368-0A16-435D-B22D-2569E29B5743	TCGA-EJ-5514	NO	Normal (no evidence of prostate cancer) [cM0]	M0	T1c	22	12	7				0		724			NO		NO	37EF54DD-2DB2-4620-8D84-4BE7B383BB42	Scheduled Follow-up Submission	Complete Remission/Response	9		No	YES	Core needle biopsy	Bilateral	NO	YES	12	8				NO	12	0	No	N0	T2c
TCGA-CH-5772-01A			63	91.78.0	Nationwide Children's Hospital	TCGA-CH-5772-F29004	6559b5a1-a6c1-4c08-a77c-394b8dfb30b8	TCGA-CH-5772	NO	Normal (no evidence of prostate cancer) [cM0]	M0		22	15	90	90	90		0		424			YES	No Evidence of Extraprostatic Extension	YES	7FCC5752-87BC-4952-BCD4-19120631B1AB	Scheduled Follow-up Submission	Complete Remission/Response	9		No	YES	Core needle biopsy	Bilateral		YES	12	2				NO	6	0	Yes	N0	T3a
TCGA-CH-5772-11A			63	91.78.0	Nationwide Children's Hospital	TCGA-CH-5772-F29004	6559b5a1-a6c1-4c08-a77c-394b8dfb30b8	TCGA-CH-5772	NO	Normal (no evidence of prostate cancer) [cM0]	M0		22	15	90	90	90		0		424			YES	No Evidence of Extraprostatic Extension	YES	7FCC5752-87BC-4952-BCD4-19120631B1AB	Scheduled Follow-up Submission	Complete Remission/Response	9		No	YES	Core needle biopsy	Bilateral		YES	12	2				NO	6	0	Yes	N0	T3a
TCGA-KK-A59V-01A			64	308.70.0	Nationwide Children's Hospital	TCGA-KK-A59V-F70432	27A42E56-E3BF-40AB-945D-871FA2A24B04	TCGA-KK-A59V	NO		M0	T3a	22	13					0		2500			NO		NO	224F1F12-592A-4E51-A164-C98FE9F1A02E	Scheduled Follow-up Submission		9		No	YES	Core needle biopsy	Bilateral	NO	YES	12	2					9	0	No	N0	T3b
TCGA-KK-A59V-11A			64	308.70.0	Nationwide Children's Hospital	TCGA-KK-A59V-F70432	27A42E56-E3BF-40AB-945D-871FA2A24B04	TCGA-KK-A59V	NO		M0	T3a	22	13					0		2500			NO		NO	224F1F12-592A-4E51-A164-C98FE9F1A02E	Scheduled Follow-up Submission		9		No	YES	Core needle biopsy	Bilateral	NO	YES	12	2					9	0	No	N0	T3b
TCGA-V1-A8WL-01A			64	389.51.0	Nationwide Children's Hospital	TCGA-V1-A8WL-F69417	9D5B4D26-B681-4684-812E-34097BE2D691	TCGA-V1-A8WL	NO		M0	T1c	22	9							1175			NO		NO	CB08122E-0CB1-4965-BFC6-D8D321D58A06	Scheduled Follow-up Submission	Complete Remission/Response	7		No	YES	Core needle biopsy	Bilateral	NO	YES	12	1				NO	4	0	No	N0	T3a
TCGA-G9-A9S4-01A			62	429.43.0	Nationwide Children's Hospital	TCGA-G9-A9S4-F66995	9820D9FB-AC02-4A09-94EE-ECCD81A79B48	TCGA-G9-A9S4	NO	Normal (no evidence of prostate cancer) [cM0]	M0	T2a	22	29	14	14			0		753			YES	Extraprostatic Extension Localized (e.g. seminal vesicles)	NO	8FE6992E-E291-4728-AE74-0ED201FEA512	Scheduled Follow-up Submission	Complete Remission/Response	8		No	YES	Core needle biopsy	Bilateral	NO	YES	12	10				NO	10	4	No	N1	T3b
TCGA-VN-A88N-01A			62	370.53.0	Nationwide Children's Hospital	TCGA-VN-A88N-F65020	09C568CE-F357-4D18-AA0B-2079873390C7	TCGA-VN-A88N	NO	Equivocal	M0	T1c	22	17	98	98	-117		0		176			YES	No Evidence of Extraprostatic Extension	YES	00AD6D15-EF91-4783-BCE1-EC8C53D3B05F	Scheduled Follow-up Submission	Complete Remission/Response	7		No	YES	Core needle biopsy	Bilateral	NO	YES	12	9				NO	50	0	No	N0	T2c
TCGA-G9-6342-01A			61	161.76.0	Nationwide Children's Hospital	TCGA-G9-6342-F40650	43813C98-3B4E-4324-A092-B23840036E16	TCGA-G9-6342	NO	Normal (no evidence of prostate cancer) [cM0]	M0	T2c	22	26	32	36			0		1338			YES	No Evidence of Extraprostatic Extension	NO	68C72787-E1AE-40A7-8B40-EC05F6CFE1FC	Scheduled Follow-up Submission	Complete Remission/Response	6		No	YES	Core needle biopsy	Bilateral	NO	NO	12	2				NO			No		T3a
TCGA-G9-6342-11A			61	161.76.0	Nationwide Children's Hospital	TCGA-G9-6342-F40650	43813C98-3B4E-4324-A092-B23840036E16	TCGA-G9-6342	NO	Normal (no evidence of prostate cancer) [cM0]	M0	T2c	22	26	32	36			0		1338			YES	No Evidence of Extraprostatic Extension	NO	68C72787-E1AE-40A7-8B40-EC05F6CFE1FC	Scheduled Follow-up Submission	Complete Remission/Response	6		No	YES	Core needle biopsy	Bilateral	NO	NO	12	2				NO			No		T3a
TCGA-EJ-5525-01A	NO	NO	67	91.78.0	Nationwide Children's Hospital	TCGA-EJ-5525-F46762	0560B8D5-21E0-444B-94A4-C8A460C537C8	TCGA-EJ-5525	YES	Normal (no evidence of prostate cancer) [cM0]	M0	T3a	22	16	-6	-6			0	546	521			YES	No Evidence of Extraprostatic Extension	NO	64CF3F01-0A13-42C8-9C6C-9CC35077AE83	Scheduled Follow-up Submission	Progressive Disease	9		No	YES	Core needle biopsy	Bilateral	NO	YES	12	8	Bone	Distant Metastasis		YES	8	0	No	N0	T2c
TCGA-J4-A67L-01A			54	312.65.0	Nationwide Children's Hospital	TCGA-J4-A67L-F63850	E6517E71-5323-43FB-8D78-ED72FB3205F4	TCGA-J4-A67L	NO		M0	T2a	22	20					0		518						5441C951-CEFE-40CA-A4CE-7CD08629D791	Scheduled Follow-up Submission	Complete Remission/Response	7		No	YES	Core needle biopsy	Left	NO	YES	12	8				NO	1	0	No	N0	T3a
TCGA-EJ-5503-01A			50	91.78.0	Nationwide Children's Hospital	TCGA-EJ-5503-F46204	E09A254F-1C32-44B5-A628-DD29C5E27C3E	TCGA-EJ-5503	NO	Normal (no evidence of prostate cancer) [cM0]	M0	T2b	22	3	31	31			0		530			YES	No Evidence of Extraprostatic Extension	NO	B565F73C-B169-41A9-83BC-B6B56DC78127	Scheduled Follow-up Submission	Complete Remission/Response	8		No	YES	Core needle biopsy	Bilateral	NO	YES	12	8				NO	21	0	No	N0	T3a
TCGA-KC-A7F3-01A			67	348.57.0	Nationwide Children's Hospital			TCGA-KC-A7F3	NO	Normal (no evidence of prostate cancer) [cM0]	M0	T1c	22		32	32	43		0		664			YES	No Evidence of Extraprostatic Extension	YES	A53A5630-AECD-4D99-91AF-D0E02E6ACFCA			7		No	YES	Core needle biopsy	Bilateral		YES	12						19	0	No	N0	T2c
TCGA-V1-A8MF-01A			65	370.53.0	Nationwide Children's Hospital	TCGA-V1-A8MF-F69431	AC7E1244-D409-41B9-A630-C4619E064616	TCGA-V1-A8MF	NO		M0	T2c	22	9							1218			NO		NO	82F6AF41-A1E7-4FDC-8BDF-E813F324B65D	Scheduled Follow-up Submission	Complete Remission/Response	6		No	YES	Core needle biopsy	Bilateral	NO	YES	12	1				NO	8	0	No	N0	T3a
TCGA-CH-5752-01A			66	91.78.0	Nationwide Children's Hospital	TCGA-CH-5752-F28987	762f37b3-0606-4d9b-8022-4be93e8aabab	TCGA-CH-5752	NO	Normal (no evidence of prostate cancer) [cM0]	M0		22	15	30	30			0		868			YES	No Evidence of Extraprostatic Extension	NO	F926AF4E-078C-47BE-B164-FDAEB75FA5A4	Scheduled Follow-up Submission	Complete Remission/Response	8		No	YES	Core needle biopsy	Bilateral		YES	12	2				NO	9	0	No	N0	T3a
TCGA-HC-8266-01A			55	221.78.0	Nationwide Children's Hospital	TCGA-HC-8266-F66043	BCBA834E-2ACD-4C1A-8304-EEB18939F712	TCGA-HC-8266			M0		22	1					0								8AD63E96-6676-4D2A-9874-A8B7F347C45C	Scheduled Follow-up Submission		8		No	YES		Bilateral	NO	YES	12	10					5	0	No	N0	T3b
TCGA-HC-A6HX-01A			55	320.62.0	Nationwide Children's Hospital			TCGA-HC-A6HX			M0	T1c	22						0								D66A5E6B-D7A4-456A-8356-8CB55322C25C			7		No	YES	Core needle biopsy	Bilateral		YES	12						4	0	No	N0	T2c
TCGA-YL-A9WI-01A			63	389.51.0	Nationwide Children's Hospital	TCGA-YL-A9WI-F67552	95352730-8F6C-416F-B606-BF503A2A6D0F	TCGA-YL-A9WI	NO	Normal (no evidence of prostate cancer) [cM0]	M0		22	6	93	99			0		1259			YES	No Evidence of Extraprostatic Extension	NO	FE895AA5-58E5-49D4-BB10-191E301554E3	Scheduled Follow-up Submission	Stable Disease	9		No	YES	Core needle biopsy	Bilateral	NO	YES	12	11				NO	15	1	No	N1	T3a
TCGA-YL-A9WJ-01A			47	389.51.0	Nationwide Children's Hospital	TCGA-YL-A9WJ-F58534	EE85914C-1E34-4AC7-8496-FC220D080FA6	TCGA-YL-A9WJ	YES	Normal (no evidence of prostate cancer) [cM0]	M0	T4	22	14	19	21	51	76	0	1476	838			YES	No Evidence of Extraprostatic Extension	YES	0CCC3907-824F-4A80-AC31-9CC5B3955D36			8		No	YES	Core needle biopsy	Bilateral	NO	YES	12	4	Other, specify	Distant Metastasis	Neck	YES	10	1	No	N1	T3b	Prostate Cancer
TCGA-WW-A8ZI-01A			70	389.51.0	Nationwide Children's Hospital	TCGA-WW-A8ZI-F67645	39F69157-1EC7-499A-88A5-68E3440BF3C6	TCGA-WW-A8ZI	NO	Normal (no evidence of prostate cancer) [cM0]	M0	T2c	22	7	13	20			0		176			YES	No Evidence of Extraprostatic Extension	NO	A8B2D7CF-B568-4D19-B530-3DDC8E5ADEB4	Scheduled Follow-up Submission	Complete Remission/Response	8		No	YES	Core needle biopsy	Bilateral	NO	YES	12	11				NO	4	0	No	N0	T2c
TCGA-V1-A8WN-01A			47	389.51.0	Nationwide Children's Hospital	TCGA-V1-A8WN-F69450	29F16E3D-3388-487A-8968-EC4E4538F081	TCGA-V1-A8WN	NO		M0	T2a	22	9							463			NO		NO	CA828071-5ACE-413C-9973-A6A1D8E38913	Scheduled Follow-up Submission	Complete Remission/Response	6		No	YES	Core needle biopsy	Bilateral	NO	NO	12	1				NO			No		T2c
TCGA-HC-8256-01A			53	221.78.0	Nationwide Children's Hospital	TCGA-HC-8256-F64369	ABAC633C-BAAC-45A4-A9C4-F83F8A3B0826	TCGA-HC-8256			M0		22	29					0								DA8F6AC3-730D-41F9-B177-0818F226ACF2	Scheduled Follow-up Submission	Complete Remission/Response	7		No	YES	Core needle biopsy	Bilateral	NO	NO	12	8				NO			No		T2c
TCGA-HC-8256-11A			53	221.78.0	Nationwide Children's Hospital	TCGA-HC-8256-F64369	ABAC633C-BAAC-45A4-A9C4-F83F8A3B0826	TCGA-HC-8256			M0		22	29					0								DA8F6AC3-730D-41F9-B177-0818F226ACF2	Scheduled Follow-up Submission	Complete Remission/Response	7		No	YES	Core needle biopsy	Bilateral	NO	NO	12	8				NO			No		T2c
TCGA-HC-A9TH-01A	YES	NO	58	429.43.0	Nationwide Children's Hospital	TCGA-HC-A9TH-F72401	D59D41BD-2351-46D9-A3B6-7C3077D515AD	TCGA-HC-A9TH	NO	Normal (no evidence of prostate cancer) [cM0]	M0	T1b	22	10	155			351	0	351	295						268CE0FC-A373-4D80-B601-2247F33CA89F	Scheduled Follow-up Submission	Progressive Disease	9		No	YES	Transurethral resection (TURBT)	Bilateral	NO	YES	12	6	Other, specify	Biochemical evidence of disease	Biochemical	YES	2	0	No	N0	T3b
TCGA-HC-7212-01A			56	184.82.0	Nationwide Children's Hospital	TCGA-HC-7212-F45569	60CDA378-6767-469B-AACC-0C4DDA37EF2D	TCGA-HC-7212			M0		22	17				396	0		424						6C1137AD-70B8-4888-9D93-5D244D372455	Scheduled Follow-up Submission	Complete Remission/Response	7		No	YES	Core needle biopsy	Right	NO	YES	12	7		Biochemical evidence of disease		YES	4	0	No	N0	T2a
TCGA-TP-A8TT-01A		YES	64	429.43.0	Nationwide Children's Hospital	TCGA-TP-A8TT-F60866	FEE1A885-DC2A-4D3F-9D67-ACB219214C9D	TCGA-TP-A8TT	NO	Normal (no evidence of prostate cancer) [cM0]	M0	T1c	22	15	23	15			0		237			YES	No Evidence of Extraprostatic Extension	NO	C67FAE58-B8A2-414C-B0E4-40912BD892E5	Scheduled Follow-up Submission	Complete Remission/Response	7		No	YES	Core needle biopsy	Left	NO	YES	12	11					11	0	No	N0	T3a
TCGA-ZG-A9LB-01A			72	429.43.0	Nationwide Children's Hospital	TCGA-ZG-A9LB-F67821	96654C4C-1B4A-407F-8471-74F391685445	TCGA-ZG-A9LB	NO	Normal (no evidence of prostate cancer) [cM0]	M0	T2a	22	12	21	31			0		485			YES	No Evidence of Extraprostatic Extension	NO	40FF26AD-2FEC-45FB-85CC-5E91CB286980	Scheduled Follow-up Submission	Stable Disease	9		No	YES	Core needle biopsy	Right	NO	YES	12	11				NO	9	0	No	N0	T3b
TCGA-XK-AAJR-01A			61	429.43.0	Nationwide Children's Hospital	TCGA-XK-AAJR-F67901	810B3C1F-44A1-4619-93DC-0BA39613A637	TCGA-XK-AAJR	YES	Normal (no evidence of prostate cancer) [cM0]	M0	T1c	22	12	12	10		131	0		753			YES	No Evidence of Extraprostatic Extension	NO	CFA978B6-29F0-47F5-AD95-21F0316EE51A	Scheduled Follow-up Submission	Complete Remission/Response	7		No	YES	Core needle biopsy	Bilateral	NO	YES	12	11				NO	8	0	No	N0	T3a
TCGA-HC-7737-01A			55	184.82.0	Nationwide Children's Hospital	TCGA-HC-7737-F60207	889FE501-D6A5-4C22-B9B3-DC022F90CE12	TCGA-HC-7737		Normal (no evidence of prostate cancer) [cM0]	M0	T1c	22	31	9	9			0		147			YES	No Evidence of Extraprostatic Extension	NO	4397C053-B2B1-41EE-8084-0AC0C57A56A2	Scheduled Follow-up Submission	Complete Remission/Response	7		No	YES	Core needle biopsy	Bilateral	NO	YES	12	5				NO	8	1	No	N1	T2c
TCGA-HC-7737-11A			55	184.82.0	Nationwide Children's Hospital	TCGA-HC-7737-F60207	889FE501-D6A5-4C22-B9B3-DC022F90CE12	TCGA-HC-7737		Normal (no evidence of prostate cancer) [cM0]	M0	T1c	22	31	9	9			0		147			YES	No Evidence of Extraprostatic Extension	NO	4397C053-B2B1-41EE-8084-0AC0C57A56A2	Scheduled Follow-up Submission	Complete Remission/Response	7		No	YES	Core needle biopsy	Bilateral	NO	YES	12	5				NO	8	1	No	N1	T2c
TCGA-EJ-5510-01A			48	91.78.0	Nationwide Children's Hospital	TCGA-EJ-5510-F46211	F8BE6107-E2CA-4929-B81D-DFB7ED84068B	TCGA-EJ-5510	NO	Normal (no evidence of prostate cancer) [cM0]	M0	T1c	22	3	14	14			0		738			YES	No Evidence of Extraprostatic Extension	NO	3F51E539-3521-4B22-A67D-5CB76CB5D625	Scheduled Follow-up Submission	Complete Remission/Response	7		No	YES	Core needle biopsy	Bilateral	NO	YES	12	8				NO	17	0	No	N0	T2c
TCGA-EJ-7327-01A			61	184.82.0	Nationwide Children's Hospital	TCGA-EJ-7327-F64808	22AC2BC6-103C-45A1-A4EC-E733D2CC028E	TCGA-EJ-7327	NO		M0	T2a	22	11					0		175			NO		NO	1A5E997D-CE31-4748-B3D6-8B00CE660CF3	Scheduled Follow-up Submission	Complete Remission/Response	7		No	YES	Core needle biopsy	Bilateral	NO	YES	12	9				NO	17	0	No	N0	T3b
TCGA-EJ-7327-11A			61	184.82.0	Nationwide Children's Hospital	TCGA-EJ-7327-F64808	22AC2BC6-103C-45A1-A4EC-E733D2CC028E	TCGA-EJ-7327	NO		M0	T2a	22	11					0		175			NO		NO	1A5E997D-CE31-4748-B3D6-8B00CE660CF3	Scheduled Follow-up Submission	Complete Remission/Response	7		No	YES	Core needle biopsy	Bilateral	NO	YES	12	9				NO	17	0	No	N0	T3b
TCGA-EJ-5497-01A			47	91.78.0	Nationwide Children's Hospital	TCGA-EJ-5497-F46199	680F390D-3704-4B35-98D4-FF11E3FD0BD0	TCGA-EJ-5497	NO		M0	T2c	22	3					0		204			NO		NO	F525BF7C-A40B-4ECE-9F9F-9E64B34BFDDC	Scheduled Follow-up Submission	Complete Remission/Response	7		No	YES	Core needle biopsy	Bilateral	NO	YES	12	8				NO	10	0	No	N0	T2c
TCGA-EJ-A8FU-01A			64	370.53.0	Nationwide Children's Hospital	TCGA-EJ-A8FU-F64788	08B38384-3A9E-4ED3-A364-11DF6F0FBE8B	TCGA-EJ-A8FU			M0	T3a	22	11					0								62872E12-64CE-4B76-B03E-0AD897738538	Scheduled Follow-up Submission	Complete Remission/Response	8		No	YES	Core needle biopsy	Bilateral	NO	YES	12	9				NO	29	0	No	N0	T3a
TCGA-EJ-5517-01A			55	91.78.0	Nationwide Children's Hospital	TCGA-EJ-5517-F46601	36195BF7-CBD1-4993-9701-9904FCA90A95	TCGA-EJ-5517	NO		M0	T1c	22	12					0		187			NO		NO	26E93610-ED32-4538-A906-D84AE6658492	Scheduled Follow-up Submission	Complete Remission/Response	6		No	YES	Core needle biopsy	Bilateral	NO	YES	12	8				NO	4	0	No	N0	T2c
TCGA-G9-A9S0-01A	NO	NO	53	429.43.0	Nationwide Children's Hospital	TCGA-G9-A9S0-F60806	CA18C99D-453B-430D-8BA2-57B329CCFB59	TCGA-G9-A9S0	YES	Normal (no evidence of prostate cancer) [cM0]	M0	T2a	22	17	73	73			0	650	759			YES	No Evidence of Extraprostatic Extension	NO	EDC0669C-7E98-45BB-99DB-243F4B095FD3	Additional New Tumor Event	Progressive Disease	8		No	YES	Transurethral resection (TURBT)	Bilateral	NO	YES	12	6	Other, specify	Distant Metastasis	Lung and Liver	YES	13	5	No	N1	T3b	Prostate Cancer
TCGA-CH-5769-01A			48	91.78.0	Nationwide Children's Hospital			TCGA-CH-5769	NO	Normal (no evidence of prostate cancer) [cM0]	M0		22		62	62			0		60			YES	No Evidence of Extraprostatic Extension	NO	97F1CB56-E9EE-4499-A207-9E542C1BD7B7			9		No	YES	Core needle biopsy	Bilateral		YES	12						8	0	No	N0	T3b
TCGA-CH-5769-11A			48	91.78.0	Nationwide Children's Hospital			TCGA-CH-5769	NO	Normal (no evidence of prostate cancer) [cM0]	M0		22		62	62			0		60			YES	No Evidence of Extraprostatic Extension	NO	97F1CB56-E9EE-4499-A207-9E542C1BD7B7			9		No	YES	Core needle biopsy	Bilateral		YES	12						8	0	No	N0	T3b
TCGA-2A-A8VO-01A			57	389.51.0	Nationwide Children's Hospital	TCGA-2A-A8VO-F71780	3A8226A3-E762-4CD4-A32A-64E485053187	TCGA-2A-A8VO	NO	Normal (no evidence of prostate cancer) [cM0]	M0	T1c	22	31	22	11	84		0		1332			YES	No Evidence of Extraprostatic Extension	YES	13F0E1EF-4F73-442C-A662-9143555CBE82	Scheduled Follow-up Submission	Complete Remission/Response	6		No	YES	Core needle biopsy	Bilateral	NO	NO	12	3				NO			No		T3a
TCGA-G9-6329-01A			67	161.76.0	Nationwide Children's Hospital	TCGA-G9-6329-F40680	2DDF41C3-2770-4F40-9418-69EA1D235AC5	TCGA-G9-6329	NO	Normal (no evidence of prostate cancer) [cM0]	M0	T1c	22	26	10	10			0		923			YES	No Evidence of Extraprostatic Extension	NO	D24678A8-6851-4EEF-AB88-578B90CB1BA5	Scheduled Follow-up Submission	Complete Remission/Response	7		No	YES	Core needle biopsy	Bilateral	NO	NO	12	2				NO			No		T2c
TCGA-G9-6364-01A			72	108.76.0	Nationwide Children's Hospital	TCGA-G9-6364-F40643	3FDB05D6-DD3F-4605-B4BC-9BF7538458B0	TCGA-G9-6364	NO		M0		22	26					0		841			NO		NO	BF49E6B2-C1CC-4A72-895F-2008D43F48B2	Scheduled Follow-up Submission	Complete Remission/Response	7		No	YES	Transurethral resection (TURBT)	Bilateral	NO	YES	12	2				NO	25	0	Yes	N0	T3a
TCGA-G9-6364-11A			72	108.76.0	Nationwide Children's Hospital	TCGA-G9-6364-F40643	3FDB05D6-DD3F-4605-B4BC-9BF7538458B0	TCGA-G9-6364	NO		M0		22	26					0		841			NO		NO	BF49E6B2-C1CC-4A72-895F-2008D43F48B2	Scheduled Follow-up Submission	Complete Remission/Response	7		No	YES	Transurethral resection (TURBT)	Bilateral	NO	YES	12	2				NO	25	0	Yes	N0	T3a
TCGA-KK-A6E7-01A	NO	NO	46	320.62.0	Nationwide Children's Hospital	TCGA-KK-A6E7-F70486	39852A31-8348-4D0E-94B8-FDA9DBE1E23F	TCGA-KK-A6E7	NO	Normal (no evidence of prostate cancer) [cM0]	M0	T1c	22	24	-46	-45	8	925	0	925	1847			YES	No Evidence of Extraprostatic Extension	YES	3FAAC7AF-9FD0-496A-A7F9-9F094455B7D9	Scheduled Follow-up Submission		9		No	YES	Core needle biopsy	Bilateral	NO	YES	12	2		Biochemical evidence of disease		YES	11	1	No	N1	T3a
TCGA-KK-A6E7-11A	NO	NO	46	320.62.0	Nationwide Children's Hospital	TCGA-KK-A6E7-F70486	39852A31-8348-4D0E-94B8-FDA9DBE1E23F	TCGA-KK-A6E7	NO	Normal (no evidence of prostate cancer) [cM0]	M0	T1c	22	24	-46	-45	8	925	0	925	1847			YES	No Evidence of Extraprostatic Extension	YES	3FAAC7AF-9FD0-496A-A7F9-9F094455B7D9	Scheduled Follow-up Submission		9		No	YES	Core needle biopsy	Bilateral	NO	YES	12	2		Biochemical evidence of disease		YES	11	1	No	N1	T3a
TCGA-HC-7744-01A			46	184.82.0	Nationwide Children's Hospital	TCGA-HC-7744-F46991	474B8A86-EDBC-48C9-86E2-4ADEBAA4A820	TCGA-HC-7744	NO	Normal (no evidence of prostate cancer) [cM0]	M0		22	21	10	40	42		0		282			YES		YES	6B203288-3CD3-4684-822D-EBEDED67452C	Scheduled Follow-up Submission	Complete Remission/Response	7		No	YES	Core needle biopsy	Bilateral	NO	YES	12	8				NO	8	0	No	N0	T3b
TCGA-HC-8261-01A			48	221.78.0	Nationwide Children's Hospital	TCGA-HC-8261-F57017	A1BE7503-60CA-44BA-B1A6-F1D8851DB110	TCGA-HC-8261					22	28					0								758A7634-412F-4DA9-A69A-DEE226DA1959	Scheduled Follow-up Submission	Complete Remission/Response	7		No	YES	Core needle biopsy	Bilateral	NO	NO	12	2				NO			No		T2c
TCGA-HC-8261-01B			48	221.78.0	Nationwide Children's Hospital	TCGA-HC-8261-F57017	A1BE7503-60CA-44BA-B1A6-F1D8851DB110	TCGA-HC-8261					22	28					0								758A7634-412F-4DA9-A69A-DEE226DA1959	Scheduled Follow-up Submission	Complete Remission/Response	7		No	YES	Core needle biopsy	Bilateral	NO	NO	12	2				NO			No		T2c
TCGA-HC-8261-11A			48	221.78.0	Nationwide Children's Hospital	TCGA-HC-8261-F57017	A1BE7503-60CA-44BA-B1A6-F1D8851DB110	TCGA-HC-8261					22	28					0								758A7634-412F-4DA9-A69A-DEE226DA1959	Scheduled Follow-up Submission	Complete Remission/Response	7		No	YES	Core needle biopsy	Bilateral	NO	NO	12	2				NO			No		T2c
TCGA-XJ-A9DK-01A			63	389.51.0	Nationwide Children's Hospital	TCGA-XJ-A9DK-F66561	3E979413-BFE0-4800-9A5F-30CEFC1CA323	TCGA-XJ-A9DK	NO		M0	T1c	22	20					0		275			NO		NO	A6C037BD-F0AB-4A77-BD67-585282688944	Scheduled Follow-up Submission		8		No	YES	Core needle biopsy	Right	YES	NO	12	10							No		T2c
TCGA-KK-A6E3-01A			56	312.65.0	Nationwide Children's Hospital			TCGA-KK-A6E3	NO	Normal (no evidence of prostate cancer) [cM0]	M0	T1c	22		10				0		1065			NO		NO	A8928DD4-3313-49B6-A872-8A450649E4F7			7		No	YES	Core needle biopsy	Bilateral		YES	12						3	0	No	N0	T2c
TCGA-KK-A6E3-11A			56	312.65.0	Nationwide Children's Hospital			TCGA-KK-A6E3	NO	Normal (no evidence of prostate cancer) [cM0]	M0	T1c	22		10				0		1065			NO		NO	A8928DD4-3313-49B6-A872-8A450649E4F7			7		No	YES	Core needle biopsy	Bilateral		YES	12						3	0	No	N0	T2c
TCGA-CH-5738-01A			72	91.78.0	Nationwide Children's Hospital	TCGA-CH-5738-F28982	b795c2c5-c509-4ba5-92ed-b0ea8df8ebf7	TCGA-CH-5738	NO		M0		22	15					0		195			NO		NO	A8CEBDF0-643F-428E-8B0D-996D15FAD25D	Scheduled Follow-up Submission	Complete Remission/Response	6		No	YES	Core needle biopsy	Bilateral		NO	12	2				NO			No
TCGA-ZG-A9N3-01A			73	429.43.0	Nationwide Children's Hospital	TCGA-ZG-A9N3-F68209	1979FBD3-99F4-4D7E-B4D2-66081FE30E6A	TCGA-ZG-A9N3	NO	Normal (no evidence of prostate cancer) [cM0]	M0	T1c	22	14	7		7		0		244			NO		YES	83CD82F7-237C-404F-B06D-6264C338B3C3	Scheduled Follow-up Submission	Stable Disease	9		No	YES	Core needle biopsy	Bilateral	NO	YES	12	11				NO	30	1	No	N1	T3b
TCGA-HC-A8CY-01A			63	370.53.0	Nationwide Children's Hospital			TCGA-HC-A8CY		Abnormal (not related to prostate cancer)	M0	T1c	22		41	41			0		290			YES	No Evidence of Extraprostatic Extension	NO	8E510146-2CAB-4087-AE08-DF05BBFF42A1			9		No	YES	Core needle biopsy	Bilateral		YES	12						3	1	No	N1	T3a
TCGA-G9-7525-01A			64	221.78.0	Nationwide Children's Hospital	TCGA-G9-7525-F48745	B362FFE1-57BE-4B63-BC27-26B478B8F758	TCGA-G9-7525	NO	Normal (no evidence of prostate cancer) [cM0]	M0	T1c	22	20	12	12			0		512			YES	No Evidence of Extraprostatic Extension	NO	93A24AF5-9FD0-44B1-B85C-347E8740EFC0	Scheduled Follow-up Submission	Complete Remission/Response	7		No	YES	Core needle biopsy	Bilateral	NO	YES	12	9				NO	6	0	No	N0	T2c
TCGA-HC-7075-01A			63	161.76.0	Nationwide Children's Hospital	TCGA-HC-7075-F45566	2A81A737-5D3E-4B8D-AE66-8865C7B8D717	TCGA-HC-7075			M0	T1c	22	17					0		96						876C8E68-0DF2-42E5-8155-76F2E58BBBE8	Scheduled Follow-up Submission	Complete Remission/Response	6		No	YES	Core needle biopsy	Right	NO	NO	12	7				NO			No		T2a
TCGA-EJ-A8FP-01A	NO	NO	59	370.53.0	Nationwide Children's Hospital	TCGA-EJ-A8FP-F64784	202DB3FB-DBD0-4628-BA45-4F036AC7DE88	TCGA-EJ-A8FP	YES		M0	T2c	22	11					0		117						786152E6-3B8E-4164-928D-CA73AF79ED38	Scheduled Follow-up Submission	Complete Remission/Response	8	acinar and ductal	No	YES	Core needle biopsy	Bilateral	NO	YES	12	9				NO	40	0	No	N0	T2c
TCGA-EJ-7782-01A			71	184.82.0	Nationwide Children's Hospital	TCGA-EJ-7782-F48882	D918F780-E5BE-4DED-A3E0-1CDF5B6569DD	TCGA-EJ-7782	NO	Normal (no evidence of prostate cancer) [cM0]	M0	T2c	22	24	49				0		350			NO		NO	2A43EF69-E70A-48BC-8433-1D8858069BB3	Scheduled Follow-up Submission	Complete Remission/Response	8		No	YES	Core needle biopsy	Bilateral	NO	YES	12	9				NO	17	0	No	N0	T2c
TCGA-EJ-7782-11A			71	184.82.0	Nationwide Children's Hospital	TCGA-EJ-7782-F48882	D918F780-E5BE-4DED-A3E0-1CDF5B6569DD	TCGA-EJ-7782	NO	Normal (no evidence of prostate cancer) [cM0]	M0	T2c	22	24	49				0		350			NO		NO	2A43EF69-E70A-48BC-8433-1D8858069BB3	Scheduled Follow-up Submission	Complete Remission/Response	8		No	YES	Core needle biopsy	Bilateral	NO	YES	12	9				NO	17	0	No	N0	T2c
TCGA-EJ-7783-01A			70	184.82.0	Nationwide Children's Hospital	TCGA-EJ-7783-F48948	1A64E239-04AC-4F4E-BF7F-D174CDD3E0AB	TCGA-EJ-7783	YES		M0	T2c	22	24					0		172			NO		NO	C8BE918C-E009-4B23-A4C8-F1C71D6C1F3B	Scheduled Follow-up Submission	Complete Remission/Response	7		No	YES	Core needle biopsy	Bilateral	NO	YES	12	9				NO	17	0	No	N0	T3a
TCGA-EJ-7783-11A			70	184.82.0	Nationwide Children's Hospital	TCGA-EJ-7783-F48948	1A64E239-04AC-4F4E-BF7F-D174CDD3E0AB	TCGA-EJ-7783	YES		M0	T2c	22	24					0		172			NO		NO	C8BE918C-E009-4B23-A4C8-F1C71D6C1F3B	Scheduled Follow-up Submission	Complete Remission/Response	7		No	YES	Core needle biopsy	Bilateral	NO	YES	12	9				NO	17	0	No	N0	T3a
TCGA-KK-A8II-01A	YES	NO	61	370.53.0	Nationwide Children's Hospital	TCGA-KK-A8II-F68762	BEB3444C-2053-4C53-8DE3-228FD0D22F94	TCGA-KK-A8II	YES	Normal (no evidence of prostate cancer) [cM0]	M0	T2c	22	16	-28	11		626	0	1854	2891			YES	No Evidence of Extraprostatic Extension	NO	40A0714D-997B-4214-AF51-12453FCC3BD0	Additional New Tumor Event	Progressive Disease	9	Mixed ductal (65%) and Acinar	No	YES	Core needle biopsy	Bilateral	NO	YES	12	12	Bone	Biochemical evidence of disease		YES	19		No	N0	T3a
TCGA-KK-A8II-11A	YES	NO	61	370.53.0	Nationwide Children's Hospital	TCGA-KK-A8II-F68762	BEB3444C-2053-4C53-8DE3-228FD0D22F94	TCGA-KK-A8II	YES	Normal (no evidence of prostate cancer) [cM0]	M0	T2c	22	16	-28	11		626	0	1854	2891			YES	No Evidence of Extraprostatic Extension	NO	40A0714D-997B-4214-AF51-12453FCC3BD0	Additional New Tumor Event	Progressive Disease	9	Mixed ductal (65%) and Acinar	No	YES	Core needle biopsy	Bilateral	NO	YES	12	12	Bone	Biochemical evidence of disease		YES	19		No	N0	T3a
TCGA-G9-7523-01A			44	221.78.0	Nationwide Children's Hospital	TCGA-G9-7523-F48753	9A8D745F-9F11-402A-A285-ADABC6F18D78	TCGA-G9-7523	NO	Abnormal (not related to prostate cancer)	M0	T1c	22	20	20	20			0		324			YES	No Evidence of Extraprostatic Extension	NO	F615E0F7-6ACC-4D1C-9200-FABE6FE2F3CC	Scheduled Follow-up Submission	Complete Remission/Response	10		No	YES	Core needle biopsy	Bilateral	NO	YES	12	9				NO	10	0	No	N0	T3a
TCGA-CH-5771-01A			63	91.78.0	Nationwide Children's Hospital	TCGA-CH-5771-F29003	bd47e516-3293-4f33-842e-4274e400224a	TCGA-CH-5771	NO	Normal (no evidence of prostate cancer) [cM0]	M0		22	15	31	31			0		396			YES	No Evidence of Extraprostatic Extension	NO	4F6C0DEF-4EDD-40A7-AFE1-E1CAC21FB4E5	Scheduled Follow-up Submission	Complete Remission/Response	7		No	YES	Core needle biopsy	Bilateral		YES	12	2				NO	2	0	No	N0	T2c
TCGA-CH-5771-11A			63	91.78.0	Nationwide Children's Hospital	TCGA-CH-5771-F29003	bd47e516-3293-4f33-842e-4274e400224a	TCGA-CH-5771	NO	Normal (no evidence of prostate cancer) [cM0]	M0		22	15	31	31			0		396			YES	No Evidence of Extraprostatic Extension	NO	4F6C0DEF-4EDD-40A7-AFE1-E1CAC21FB4E5	Scheduled Follow-up Submission	Complete Remission/Response	7		No	YES	Core needle biopsy	Bilateral		YES	12	2				NO	2	0	No	N0	T2c
TCGA-V1-A9OF-01A			49	429.43.0	Nationwide Children's Hospital	TCGA-V1-A9OF-F69400	399B2FC2-57FF-450B-A554-A813F9CC1C0E	TCGA-V1-A9OF	NO		M0	T1c	22	9							1184			NO		NO	B20DCB34-8CE0-443D-9AF2-CE9D5C6347B9	Scheduled Follow-up Submission	Complete Remission/Response	6		No	YES	Core needle biopsy	Bilateral	NO	NO	12	1				NO			No		T2c
TCGA-EJ-A7NH-01A			56	348.57.0	Nationwide Children's Hospital	TCGA-EJ-A7NH-F64726	966C9610-2667-4FDC-A373-2264669B38DE	TCGA-EJ-A7NH	NO		M0	T2c	22	10					0		105						77DBF8A2-DDC1-4219-B107-E4D9AA5592AE	Scheduled Follow-up Submission	Complete Remission/Response	7		No	YES	Core needle biopsy	Bilateral	NO	YES	12	9				NO	4		No	N0	T2c
TCGA-VN-A88Q-01A			60	357.55.0	Nationwide Children's Hospital	TCGA-VN-A88Q-F68875	B835A522-7326-40CC-9D5D-9C889B43E7EC	TCGA-VN-A88Q	NO	Abnormal (not related to prostate cancer)	M0	T2a	22	22	929		796		0		1000			NO		YES	25AA517F-CA7D-4519-BC28-61E4BEAB2844	Scheduled Follow-up Submission	Complete Remission/Response	8	Prostatic Adenocarcinoma Acinar Type Mixed with Prostatic Duct Adenocarcinoma	No	YES	Core needle biopsy	Bilateral	NO	YES	12	12				NO	12	0	No	N0	T2c
TCGA-EJ-7781-01A			65	184.82.0	Nationwide Children's Hospital	TCGA-EJ-7781-F48880	99578077-415F-45F3-AAEE-E8A73B560831	TCGA-EJ-7781	NO		M0	T1c	22	24					0		169			NO		NO	4E6E42AD-9BBA-4576-ABB5-E65E1C50D1A3	Scheduled Follow-up Submission	Complete Remission/Response	7		No	YES	Core needle biopsy	Bilateral	NO	YES	12	9				NO	17	0	No	N0	T2c
TCGA-EJ-7781-11A			65	184.82.0	Nationwide Children's Hospital	TCGA-EJ-7781-F48880	99578077-415F-45F3-AAEE-E8A73B560831	TCGA-EJ-7781	NO		M0	T1c	22	24					0		169			NO		NO	4E6E42AD-9BBA-4576-ABB5-E65E1C50D1A3	Scheduled Follow-up Submission	Complete Remission/Response	7		No	YES	Core needle biopsy	Bilateral	NO	YES	12	9				NO	17	0	No	N0	T2c
TCGA-EJ-7312-01B			58	331.61.0	Nationwide Children's Hospital	TCGA-EJ-7312-F64805	42DBC60D-D84F-46CF-941B-39057A846D90	TCGA-EJ-7312	NO		M0	T3b	22	11					0		376						3E794958-9F1F-4313-92C3-84FA42AB546D	Scheduled Follow-up Submission	Complete Remission/Response	7		No	YES	Core needle biopsy	Bilateral	NO	YES	12	9				NO	3	0	Yes, History of Prior Malignancy	N0	T3b
TCGA-YL-A9WY-01A			57	429.43.0	Nationwide Children's Hospital	TCGA-YL-A9WY-F58520	9D53C968-CBEE-4BD3-9D05-42B0C17CFFFD	TCGA-YL-A9WY	YES	Normal (no evidence of prostate cancer) [cM0]	M0	T3a	22	13	50		62	765	0	765	765			NO		YES	EF86D339-F60F-4921-8167-A5F1D2A93DC9	Scheduled Follow-up Submission		9		No	YES	Core needle biopsy	Bilateral	NO	YES	12	4		Biochemical evidence of disease		YES	19	11	No	N1	T3b
TCGA-EJ-7330-01A			68	184.82.0	Nationwide Children's Hospital			TCGA-EJ-7330	NO		M0	T1c	22						0		191			NO		NO	7E538E99-B0A3-4BCA-9CE1-EED2C1D31F57			7		No	YES	Core needle biopsy	Bilateral		YES	12						18	0	No	N0	T3a
TCGA-EJ-7330-11A			68	184.82.0	Nationwide Children's Hospital			TCGA-EJ-7330	NO		M0	T1c	22						0		191			NO		NO	7E538E99-B0A3-4BCA-9CE1-EED2C1D31F57			7		No	YES	Core needle biopsy	Bilateral		YES	12						18	0	No	N0	T3a
TCGA-KC-A4BR-01A			75	268.67.0	Nationwide Children's Hospital			TCGA-KC-A4BR	NO	Abnormal (not related to prostate cancer)	M0	T2	22		15	-8	90		0		1258			YES	No Evidence of Extraprostatic Extension	YES	57E54A91-BD0F-4858-A862-F850F17E26CB			9		No	YES	Core needle biopsy	Bilateral		YES	12						11	1	No	N1	T3b
TCGA-ZG-A9L5-01A			58	429.43.0	Nationwide Children's Hospital	TCGA-ZG-A9L5-F67815	4C2C80A7-A9DB-4053-A8F5-44F4E06561B8	TCGA-ZG-A9L5	NO		M0	T2a	22	12		11			0					YES	Extraprostatic Extension (regional lymphadenopathy)[e.g. cN1]	NO	AB32991E-95DA-4798-8BAE-2A089B2724FB	Scheduled Follow-up Submission	Stable Disease	9		No	YES	Core needle biopsy	Bilateral	NO	YES	12	11				NO	3	1	No	N1	T4
TCGA-XK-AAJU-01A			65	429.43.0	Nationwide Children's Hospital	TCGA-XK-AAJU-F66884	51D11486-AB50-44B7-B659-DB1D4B3AA5A8	TCGA-XK-AAJU	NO	Normal (no evidence of prostate cancer) [cM0]	M0	T1c	22	24	9				0		1206			NO		NO	CB810A73-4351-42C6-9A28-EF76C966C8FC	Scheduled Follow-up Submission	Complete Remission/Response	7		No	YES	Core needle biopsy	Bilateral	NO	YES	12	10				NO	5	0	No	N0	T2c
TCGA-KK-A6E2-01A			54	315.66.0	Nationwide Children's Hospital	TCGA-KK-A6E2-F70481	791B9DD1-46BC-42B6-A056-8DA8C48C9FF6	TCGA-KK-A6E2	NO		M0	T2a	22	24					0		438			NO		NO	F65D3E92-E23E-4EB5-94ED-CE0F3CBB12EE	Scheduled Follow-up Submission		7		No	YES	Core needle biopsy	Bilateral	NO	YES	12	2					5	0	No	N0	T2c
TCGA-KK-A6E2-11A			54	315.66.0	Nationwide Children's Hospital	TCGA-KK-A6E2-F70481	791B9DD1-46BC-42B6-A056-8DA8C48C9FF6	TCGA-KK-A6E2	NO		M0	T2a	22	24					0		438			NO		NO	F65D3E92-E23E-4EB5-94ED-CE0F3CBB12EE	Scheduled Follow-up Submission		7		No	YES	Core needle biopsy	Bilateral	NO	YES	12	2					5	0	No	N0	T2c
TCGA-KK-A6E8-01A			68	320.62.0	Nationwide Children's Hospital			TCGA-KK-A6E8	NO	Normal (no evidence of prostate cancer) [cM0]	M0	T1c	22		97		104		0		1769			NO		YES	B18F697A-5CBF-48D0-B0FD-7C407ADC1279			9		No	YES	Core needle biopsy	Bilateral		YES	12						14	0	No	N0	T2c
TCGA-KK-A6E8-11A			68	320.62.0	Nationwide Children's Hospital			TCGA-KK-A6E8	NO	Normal (no evidence of prostate cancer) [cM0]	M0	T1c	22		97		104		0		1769			NO		YES	B18F697A-5CBF-48D0-B0FD-7C407ADC1279			9		No	YES	Core needle biopsy	Bilateral		YES	12						14	0	No	N0	T2c
TCGA-V1-A9Z7-01A			54	429.43.0	Nationwide Children's Hospital	TCGA-V1-A9Z7-F70268	EDC32C5A-079B-4D24-BFAF-E17F8876C986	TCGA-V1-A9Z7	YES		M0	T2	22	2		50					-75			YES	No Evidence of Extraprostatic Extension	NO	9071F8E4-95DA-48AA-8E90-3CC27466C94D	Scheduled Follow-up Submission		9		No	YES	Core needle biopsy	Bilateral	NO	YES	12	2					10	0	No	N0	T3b
TCGA-EJ-5527-01A			69	91.78.0	Nationwide Children's Hospital	TCGA-EJ-5527-F46764	B2F71C4B-C5C8-4C6B-A8DD-A8091F7572FD	TCGA-EJ-5527	NO		M0	T2a	22	16					0		217			NO		NO	78BA4E16-9054-4810-8A96-70CD8A477EEB	Scheduled Follow-up Submission	Complete Remission/Response	7		No	YES	Core needle biopsy	Bilateral	NO	YES	12	8				NO	9	0	No	N0	T3a
TCGA-G9-6333-01A			66	161.76.0	Nationwide Children's Hospital	TCGA-G9-6333-F40652	F307A172-11C3-4EB9-A559-96E55DFD2B93	TCGA-G9-6333	NO	Normal (no evidence of prostate cancer) [cM0]	M0	T1c	22	26	1102	1102			0		1920			YES	No Evidence of Extraprostatic Extension	NO	0DF195C5-BC06-4FDA-994D-1552A1A67272	Scheduled Follow-up Submission	Complete Remission/Response	7		No	YES	Core needle biopsy	Bilateral	NO	YES	12	2				NO	13	0	No	N0	T2c
TCGA-G9-6333-11A			66	161.76.0	Nationwide Children's Hospital	TCGA-G9-6333-F40652	F307A172-11C3-4EB9-A559-96E55DFD2B93	TCGA-G9-6333	NO	Normal (no evidence of prostate cancer) [cM0]	M0	T1c	22	26	1102	1102			0		1920			YES	No Evidence of Extraprostatic Extension	NO	0DF195C5-BC06-4FDA-994D-1552A1A67272	Scheduled Follow-up Submission	Complete Remission/Response	7		No	YES	Core needle biopsy	Bilateral	NO	YES	12	2				NO	13	0	No	N0	T2c
TCGA-XK-AAIR-01A			75	429.43.0	Nationwide Children's Hospital	TCGA-XK-AAIR-F68320	21D4E7CC-BFB7-4A2D-9FEB-0E59FBF61912	TCGA-XK-AAIR	NO		M0	T1c	22	14					0		953			NO		NO	32F61B5E-5380-4542-B841-9967C44D3E82	Scheduled Follow-up Submission	Complete Remission/Response	8		No	YES	Core needle biopsy	Bilateral	NO	YES	12	11				NO	10	0	No	N0	T2c
TCGA-KK-A7AP-01A			55	348.57.0	Nationwide Children's Hospital			TCGA-KK-A7AP		Normal (no evidence of prostate cancer) [cM0]	M0	T2b	22		175				0					NO		NO	39A52D60-B11D-42CF-B568-77B976A78F46			9		No	YES	Core needle biopsy	Right		YES	12						15	2	Yes, History of Prior Malignancy	N1	T3b
TCGA-KK-A7AP-11A			55	348.57.0	Nationwide Children's Hospital			TCGA-KK-A7AP		Normal (no evidence of prostate cancer) [cM0]	M0	T2b	22		175				0					NO		NO	39A52D60-B11D-42CF-B568-77B976A78F46			9		No	YES	Core needle biopsy	Right		YES	12						15	2	Yes, History of Prior Malignancy	N1	T3b
TCGA-ZG-A9LY-01A			60	429.43.0	Nationwide Children's Hospital	TCGA-ZG-A9LY-F67845	FB136885-AAF7-47E9-AF76-162BE76F734A	TCGA-ZG-A9LY	NO	Normal (no evidence of prostate cancer) [cM0]	M0	T2b	22	12	20	12			0		288			YES	No Evidence of Extraprostatic Extension	NO	431B9776-A205-46B5-81CB-DC5D22B8D629	Scheduled Follow-up Submission	Complete Remission/Response	9		No	YES	Core needle biopsy	Bilateral	NO	YES	12	11				NO	11	1	No	N1	T3b
TCGA-CH-5766-01A			55	91.78.0	Nationwide Children's Hospital			TCGA-CH-5766	NO	Normal (no evidence of prostate cancer) [cM0]	M0		22		31	31			0		39			YES	No Evidence of Extraprostatic Extension	NO	990F4717-1DD9-42E3-9C0E-53582306CD04			7		No	YES	Core needle biopsy	Bilateral		YES	12						4	1	No	N1	T3a
TCGA-CH-5766-11A			55	91.78.0	Nationwide Children's Hospital			TCGA-CH-5766	NO	Normal (no evidence of prostate cancer) [cM0]	M0		22		31	31			0		39			YES	No Evidence of Extraprostatic Extension	NO	990F4717-1DD9-42E3-9C0E-53582306CD04			7		No	YES	Core needle biopsy	Bilateral		YES	12						4	1	No	N1	T3a
TCGA-EJ-7792-01A			53	184.82.0	Nationwide Children's Hospital	TCGA-EJ-7792-F48847	A4C983C1-5A64-4E45-B9DD-B94BF95ADBD0	TCGA-EJ-7792	NO		M0	T1c	22	23					0		526			NO		NO	3CCC56F4-E5A4-4D4A-820C-7C2606BAC208	Scheduled Follow-up Submission	Complete Remission/Response	7		No	YES	Core needle biopsy	Bilateral	NO	YES	12	9				NO	35	0	No	N0	T2c
TCGA-EJ-7792-11A			53	184.82.0	Nationwide Children's Hospital	TCGA-EJ-7792-F48847	A4C983C1-5A64-4E45-B9DD-B94BF95ADBD0	TCGA-EJ-7792	NO		M0	T1c	22	23					0		526			NO		NO	3CCC56F4-E5A4-4D4A-820C-7C2606BAC208	Scheduled Follow-up Submission	Complete Remission/Response	7		No	YES	Core needle biopsy	Bilateral	NO	YES	12	9				NO	35	0	No	N0	T2c
TCGA-HC-7077-01A			64	161.76.0	Nationwide Children's Hospital	TCGA-HC-7077-F47784	8E0F06D4-AFD2-4333-86FA-E7C34324D710	TCGA-HC-7077		Normal (no evidence of prostate cancer) [cM0]	M0	T1c	22	28	-14				0		1749			NO		NO	19401574-B591-47AF-B0BA-D8117D0688B6	Scheduled Follow-up Submission	Complete Remission/Response	6		No	YES	Transurethral resection (TURBT)	Bilateral	NO	NO	12	8				NO			No		T3a
TCGA-KK-A8IG-01A			55	370.53.0	Nationwide Children's Hospital	TCGA-KK-A8IG-F70530	1E38FF26-F647-41E6-A694-8041AEBDA1FF	TCGA-KK-A8IG	NO	Normal (no evidence of prostate cancer) [cM0]	M0	T2a	22	24	63	63			0		2211			YES	No Evidence of Extraprostatic Extension	NO	BF457ADA-F37C-418D-963C-F18AEFA43068	Scheduled Follow-up Submission	Complete Remission/Response	7		No	YES	Core needle biopsy	Bilateral	NO	YES	12	2				NO	19		No	N0	T3a
TCGA-KK-A8IG-11A			55	370.53.0	Nationwide Children's Hospital	TCGA-KK-A8IG-F70530	1E38FF26-F647-41E6-A694-8041AEBDA1FF	TCGA-KK-A8IG	NO	Normal (no evidence of prostate cancer) [cM0]	M0	T2a	22	24	63	63			0		2211			YES	No Evidence of Extraprostatic Extension	NO	BF457ADA-F37C-418D-963C-F18AEFA43068	Scheduled Follow-up Submission	Complete Remission/Response	7		No	YES	Core needle biopsy	Bilateral	NO	YES	12	2				NO	19		No	N0	T3a
TCGA-CH-5788-01A			69	91.78.0	Nationwide Children's Hospital	TCGA-CH-5788-F28991	9134d7b5-aaf6-452e-b1f2-698fe9c1c9af	TCGA-CH-5788	YES	Normal (no evidence of prostate cancer) [cM0]	M0		22	15	31	31			0		786			YES	No Evidence of Extraprostatic Extension	NO	4263829F-B11F-4533-BD2D-FB89EA98DD60	Scheduled Follow-up Submission	Progressive Disease	7		No	YES	Core needle biopsy	Bilateral		YES	12	2					21	6	No	N1	T3b
TCGA-KK-A7AV-01A			58	331.61.0	Nationwide Children's Hospital	TCGA-KK-A7AV-F70507	4C54FE4F-1024-4E72-A104-5113923CC396	TCGA-KK-A7AV	NO		M0	T1c	22	24			48		0		822			NO		YES	1D4381D2-B74D-48E7-A8A2-846F39D0D347	Scheduled Follow-up Submission	Complete Remission/Response	7		No	YES	Core needle biopsy	Bilateral	NO	YES	12	2				NO	23	0	No	N0	T2c
TCGA-KK-A7AV-11A			58	331.61.0	Nationwide Children's Hospital	TCGA-KK-A7AV-F70507	4C54FE4F-1024-4E72-A104-5113923CC396	TCGA-KK-A7AV	NO		M0	T1c	22	24			48		0		822			NO		YES	1D4381D2-B74D-48E7-A8A2-846F39D0D347	Scheduled Follow-up Submission	Complete Remission/Response	7		No	YES	Core needle biopsy	Bilateral	NO	YES	12	2				NO	23	0	No	N0	T2c
TCGA-V1-A9OL-01A	NO	NO	65	429.43.0	Nationwide Children's Hospital	TCGA-V1-A9OL-F69471	7A24D0EB-39D3-4A8A-B0CB-360399DB12E7	TCGA-V1-A9OL	NO		M0	T2	22	9		19		105			559			YES	No Evidence of Extraprostatic Extension	NO	819DEA8A-3E19-4061-8D36-7E684D1E61AD	Scheduled Follow-up Submission	Complete Remission/Response	9		No	YES	Core needle biopsy	Bilateral	NO	YES	12	1		Biochemical evidence of disease		YES	9	0	No	N0	T3b
TCGA-CH-5745-01A			68	91.78.0	Nationwide Children's Hospital			TCGA-CH-5745	NO	Normal (no evidence of prostate cancer) [cM0]	M0		22		91				0		84			NO		NO	B5EADF40-6F5D-4B30-80CF-2775BC3FDD4B			7		No	YES	Core needle biopsy			YES	12						5	0	No	N0	T3a
TCGA-CH-5761-01A			61	91.78.0	Nationwide Children's Hospital			TCGA-CH-5761	NO	Normal (no evidence of prostate cancer) [cM0]	M0		22		28	28	28		0		39			YES	Equivocal	YES	970B70BC-052F-4986-B3CA-AEB24FFB3893			9		No	YES	Core needle biopsy	Left		YES	12						5	0	No	N0	T3b
TCGA-CH-5761-11A			61	91.78.0	Nationwide Children's Hospital			TCGA-CH-5761	NO	Normal (no evidence of prostate cancer) [cM0]	M0		22		28	28	28		0		39			YES	Equivocal	YES	970B70BC-052F-4986-B3CA-AEB24FFB3893			9		No	YES	Core needle biopsy	Left		YES	12						5	0	No	N0	T3b
TCGA-J9-A8CL-01A			66	357.55.0	Nationwide Children's Hospital			TCGA-J9-A8CL	YES	Equivocal	M0	T3a	22		6	11			0		405			YES	No Evidence of Extraprostatic Extension	NO	DB6455D7-4C22-416E-BCA0-00D20BF1401D			9		No	YES	Core needle biopsy	Bilateral		NO	12								No		T3b
TCGA-V1-A8ML-01A			63	389.51.0	Nationwide Children's Hospital	TCGA-V1-A8ML-F69415	58F62EFE-69D5-4F2F-9F1B-0B8F04BE2C92	TCGA-V1-A8ML	NO		M0	T2b	22	9							448			NO		NO	AEC912D7-8E23-423D-AA66-18E755B874D8	Scheduled Follow-up Submission	Complete Remission/Response	7		No	YES	Core needle biopsy	Bilateral	NO	YES	12	1				NO	12	0	No	N0	T2c
TCGA-V1-A8MG-01A			53	370.53.0	Nationwide Children's Hospital	TCGA-V1-A8MG-F69432	C94D098E-F1F5-4DE7-B8D6-EC8A5A5AB7AC	TCGA-V1-A8MG	NO		M0	T2c	22	9							583			NO		NO	58EB6841-17D0-42E8-AC36-A6B214565D74	Scheduled Follow-up Submission	Complete Remission/Response	7		No	YES	Core needle biopsy	Bilateral	NO	NO	12	1				NO			No		T3b
TCGA-CH-5790-01A			64	91.78.0	Nationwide Children's Hospital	TCGA-CH-5790-F28986	c21f1958-ff87-416b-b8f9-e2066293efb4	TCGA-CH-5790	NO		M0		22	15					0		914			NO		NO	8A7E2CE1-5359-4092-8559-AC56474B6917	Scheduled Follow-up Submission	Complete Remission/Response	7		No	YES	Core needle biopsy	Bilateral		YES	12	2				NO	5	0	Yes	N0	T2c
TCGA-CH-5746-01A			57	91.78.0	Nationwide Children's Hospital	TCGA-CH-5746-F28996	90a1a1cd-057d-45ea-b417-3ba252ddbb98	TCGA-CH-5746	NO	Normal (no evidence of prostate cancer) [cM0]	M0		22	15	59	59			0		693			YES	No Evidence of Extraprostatic Extension	NO	7A49E2D9-0EE0-43AD-A0CA-838F02D536E9	Scheduled Follow-up Submission	Complete Remission/Response	7		No	YES	Core needle biopsy	Bilateral		YES	12	2				NO	2	0	No	N0	T2c
TCGA-HC-7210-01A			74	184.82.0	Nationwide Children's Hospital	TCGA-HC-7210-F64378	CC39BC20-837C-4D45-96D1-87B31BE8BE7A	TCGA-HC-7210					22	29					0		149						FDFC3E59-3FD3-448D-ADDA-AF57D322B4C1	Scheduled Follow-up Submission	Complete Remission/Response	7		No	YES	Core needle biopsy	Right	NO	YES	12	8				NO	7	0	No	N0	T2a
TCGA-KK-A8I9-01A	NO	NO	61	370.53.0	Nationwide Children's Hospital	TCGA-KK-A8I9-F70527	D21E6C00-4C57-4DB6-B58F-DCC8E3F79E24	TCGA-KK-A8I9	NO	Normal (no evidence of prostate cancer) [cM0]	M0	T2b	22	24	0	-3	0	940	0	940	721			YES	No Evidence of Extraprostatic Extension	YES	DEE33EA4-01C9-4463-92FB-9169DF858335	Scheduled Follow-up Submission	Stable Disease	8		No	YES	Core needle biopsy	Bilateral	NO	YES	12	2		Biochemical evidence of disease		YES	14		No	N0	T3a
TCGA-KK-A8I9-11A	NO	NO	61	370.53.0	Nationwide Children's Hospital	TCGA-KK-A8I9-F70527	D21E6C00-4C57-4DB6-B58F-DCC8E3F79E24	TCGA-KK-A8I9	NO	Normal (no evidence of prostate cancer) [cM0]	M0	T2b	22	24	0	-3	0	940	0	940	721			YES	No Evidence of Extraprostatic Extension	YES	DEE33EA4-01C9-4463-92FB-9169DF858335	Scheduled Follow-up Submission	Stable Disease	8		No	YES	Core needle biopsy	Bilateral	NO	YES	12	2		Biochemical evidence of disease		YES	14		No	N0	T3a
TCGA-EJ-5509-01A			63	91.78.0	Nationwide Children's Hospital	TCGA-EJ-5509-F46210	908BE10F-7A02-4722-948E-FAF4DF8DDAC1	TCGA-EJ-5509	NO		M0	T2a	22	3					0		1102			NO		NO	58E592FF-3F5F-4C41-9ED5-BABA68C685AF	Scheduled Follow-up Submission	Complete Remission/Response	7		No	YES	Core needle biopsy	Bilateral	NO	YES	12	8				NO	10	0	No	N0	T2c
TCGA-EJ-A46G-01A			71	285.66.0	Nationwide Children's Hospital	TCGA-EJ-A46G-F64646	3C138C0C-D8E3-43EE-AE06-D2230CCFB2FC	TCGA-EJ-A46G	NO	Normal (no evidence of prostate cancer) [cM0]	M0	T3a	22	8	28				0		93						05A9CC69-34B6-4CAE-83C7-835457716E27	Scheduled Follow-up Submission	Complete Remission/Response	8	Adenocarcinoma prostate with prominent ductal differentiation identified	No	YES	Core needle biopsy	Bilateral	NO	YES	12	9				NO	17	0	Yes, History of Prior Malignancy	N0	T3a
TCGA-EJ-A7NN-01A			61	348.57.0	Nationwide Children's Hospital	TCGA-EJ-A7NN-F64763	9D8253F1-51D2-4ACB-9AA2-8C0B93F59E99	TCGA-EJ-A7NN	YES		M0	T3b	22	10					0		197						15DCF866-B283-4FCB-BE8D-89D80AF3F92A	Scheduled Follow-up Submission	Complete Remission/Response	7		No	YES	Core needle biopsy	Bilateral	NO	YES	12	9				NO	25	3	No	N1	T3b
TCGA-YL-A9WK-01A	YES	NO	63	389.51.0	Nationwide Children's Hospital	TCGA-YL-A9WK-F58524	88F0A5F4-C254-4FCA-8F3E-BFD9829C73B0	TCGA-YL-A9WK	YES	Normal (no evidence of prostate cancer) [cM0]	M0	T2b	22	13	329			1009	0	1009	1871	1687	1871	NO		NO	6AC02D03-A550-48F9-B0BA-C87D54BA5115	Additional New Tumor Event		9		No	YES	Core needle biopsy	Bilateral	NO	YES	12	4		Biochemical evidence of disease		YES	1	0	No	N0	T3b
TCGA-ZG-A9ND-01A			55	429.43.0	Nationwide Children's Hospital	TCGA-ZG-A9ND-F68219	6CB2EFFB-8333-405A-906A-0F0AB3350F5D	TCGA-ZG-A9ND	NO	Normal (no evidence of prostate cancer) [cM0]	M0	T1c	22	14	7	10			0		184			YES	No Evidence of Extraprostatic Extension	NO	FBBCA3D3-C988-4141-9ABD-B77793D3B5BD	Scheduled Follow-up Submission	Stable Disease	9		No	YES	Core needle biopsy	Bilateral	NO	YES	12	11				NO	8	0	No	N0	T3a
TCGA-G9-6367-01A			60	108.76.0	Nationwide Children's Hospital	TCGA-G9-6367-F40631	827EEAEA-7D21-4DDC-973E-8E5541064BF8	TCGA-G9-6367		Normal (no evidence of prostate cancer) [cM0]	M0	T2b	22	8	30	30			0		836			YES	No Evidence of Extraprostatic Extension	NO	F4124BE7-6627-4893-ACC3-54E3D9C81B48	Scheduled Follow-up Submission	Progressive Disease	9		No	YES	Core needle biopsy	Bilateral	NO	YES	12	3				NO	5	0	No	N0	T3a
TCGA-G9-6367-11A			60	108.76.0	Nationwide Children's Hospital	TCGA-G9-6367-F40631	827EEAEA-7D21-4DDC-973E-8E5541064BF8	TCGA-G9-6367		Normal (no evidence of prostate cancer) [cM0]	M0	T2b	22	8	30	30			0		836			YES	No Evidence of Extraprostatic Extension	NO	F4124BE7-6627-4893-ACC3-54E3D9C81B48	Scheduled Follow-up Submission	Progressive Disease	9		No	YES	Core needle biopsy	Bilateral	NO	YES	12	3				NO	5	0	No	N0	T3a
TCGA-KK-A8IH-01A			50	370.53.0	Nationwide Children's Hospital	TCGA-KK-A8IH-F70531	D11A8C67-F484-4BEB-95F7-5A8A807ABCE8	TCGA-KK-A8IH	NO		M0	T2b	22	24					0		1634			NO		NO	0F5088F7-2CC6-4A04-B0B8-AF295785B0B8	Scheduled Follow-up Submission	Complete Remission/Response	7		No	YES	Core needle biopsy	Bilateral	NO	YES	12	2				NO	10		No	N0	T3a
TCGA-KK-A8IH-11A			50	370.53.0	Nationwide Children's Hospital	TCGA-KK-A8IH-F70531	D11A8C67-F484-4BEB-95F7-5A8A807ABCE8	TCGA-KK-A8IH	NO		M0	T2b	22	24					0		1634			NO		NO	0F5088F7-2CC6-4A04-B0B8-AF295785B0B8	Scheduled Follow-up Submission	Complete Remission/Response	7		No	YES	Core needle biopsy	Bilateral	NO	YES	12	2				NO	10		No	N0	T3a
TCGA-HC-7232-01A	NO	YES	66	184.82.0	Nationwide Children's Hospital	TCGA-HC-7232-F64391	D928D4E3-49FA-4A38-AA0C-483FC08C501D	TCGA-HC-7232					22	29				766	0	766							9935FB45-F6E8-49DB-9267-E0B877739312	Scheduled Follow-up Submission	Stable Disease	9		No	YES	Core needle biopsy	Bilateral	NO	NO	12	8		Biochemical evidence of disease		YES			No		T3b
TCGA-HC-8258-01A			56	221.78.0	Nationwide Children's Hospital	TCGA-HC-8258-F48771	2B241953-9127-4122-ABC2-C7830BA9A29E	TCGA-HC-8258	NO				22	20					0		162						4DE4F8D3-F7F9-49F9-9A76-21C55DC88876	Scheduled Follow-up Submission	Complete Remission/Response	6		No	YES	Core needle biopsy	Bilateral	NO	YES	12	9				NO	2	0	No	N0	T2c
TCGA-HC-8258-01B			56	221.78.0	Nationwide Children's Hospital	TCGA-HC-8258-F48771	2B241953-9127-4122-ABC2-C7830BA9A29E	TCGA-HC-8258	NO				22	20					0		162						4DE4F8D3-F7F9-49F9-9A76-21C55DC88876	Scheduled Follow-up Submission	Complete Remission/Response	6		No	YES	Core needle biopsy	Bilateral	NO	YES	12	9				NO	2	0	No	N0	T2c
TCGA-HC-8258-11A			56	221.78.0	Nationwide Children's Hospital	TCGA-HC-8258-F48771	2B241953-9127-4122-ABC2-C7830BA9A29E	TCGA-HC-8258	NO				22	20					0		162						4DE4F8D3-F7F9-49F9-9A76-21C55DC88876	Scheduled Follow-up Submission	Complete Remission/Response	6		No	YES	Core needle biopsy	Bilateral	NO	YES	12	9				NO	2	0	No	N0	T2c
TCGA-KK-A7AW-01A			57	331.61.0	Nationwide Children's Hospital			TCGA-KK-A7AW	YES		M0	T2a	22			11			0		204			YES		NO	340649FE-9CD4-4098-9625-8FA6180390DD			7		No	YES	Core needle biopsy	Right		YES	12						9	1	No	N1	T3a
TCGA-KK-A7AW-11A			57	331.61.0	Nationwide Children's Hospital			TCGA-KK-A7AW	YES		M0	T2a	22			11			0		204			YES		NO	340649FE-9CD4-4098-9625-8FA6180390DD			7		No	YES	Core needle biopsy	Right		YES	12						9	1	No	N1	T3a
TCGA-YL-A8SR-01B			64	389.51.0	Nationwide Children's Hospital	TCGA-YL-A8SR-F67281	CD160854-52C0-4E13-A9F9-53CA133F3965	TCGA-YL-A8SR	NO	Normal (no evidence of prostate cancer) [cM0]	M0	T1c	22	7	-1060	-1062			0		222			YES	No Evidence of Extraprostatic Extension	NO	A37E7F50-74E5-4CA2-AFC8-65C6520DBC55	Scheduled Follow-up Submission		9		No	YES	Core needle biopsy	Bilateral	YES	YES	12	11					6	0	No	N0	T3a
TCGA-V1-A9ZR-01A			68	429.43.0	Nationwide Children's Hospital	TCGA-V1-A9ZR-F70265	E38CA1AF-6973-44C1-BB17-5DF5270D1A25	TCGA-V1-A9ZR	YES		M0	T2c	22	2		78					54			YES	No Evidence of Extraprostatic Extension	NO	B9C78916-2DD8-4D90-A538-5A53681C6AE4	Scheduled Follow-up Submission	Complete Remission/Response	8		No	YES	Core needle biopsy	Bilateral	NO	YES	12	2					7		No	N0	T4
TCGA-ZG-A9L0-01A			71	429.43.0	Nationwide Children's Hospital	TCGA-ZG-A9L0-F67810	8DBF86D2-DA3D-4D6D-80B5-3BAF9FABA00C	TCGA-ZG-A9L0		Normal (no evidence of prostate cancer) [cM0]	M0		22	12	-16	-119			0					YES	No Evidence of Extraprostatic Extension	NO	9A1C9F24-9BFC-44D4-940E-6E294E55C19E	Scheduled Follow-up Submission	Stable Disease	9		No	YES	Core needle biopsy	Bilateral	NO	YES	12	11				NO	20	7	No	N1	T3b
TCGA-EJ-8472-01A			63	244.69.0	Nationwide Children's Hospital	TCGA-EJ-8472-F64638	B79CBAE7-C25A-4E2F-A906-0C534E4449C8	TCGA-EJ-8472	YES		M0	T3a	22	8					0		196						864FC664-B7BC-4298-85F1-CD6DEBA38932	Scheduled Follow-up Submission	Complete Remission/Response	8		No	YES	Core needle biopsy		NO	YES	12	9				NO	12	0	No	N0	T3a
TCGA-EJ-8472-11A			63	244.69.0	Nationwide Children's Hospital	TCGA-EJ-8472-F64638	B79CBAE7-C25A-4E2F-A906-0C534E4449C8	TCGA-EJ-8472	YES		M0	T3a	22	8					0		196						864FC664-B7BC-4298-85F1-CD6DEBA38932	Scheduled Follow-up Submission	Complete Remission/Response	8		No	YES	Core needle biopsy		NO	YES	12	9				NO	12	0	No	N0	T3a
TCGA-CH-5792-01A			57	91.78.0	Nationwide Children's Hospital			TCGA-CH-5792	NO	Normal (no evidence of prostate cancer) [cM0]	M0		22		91				0		91			NO		NO	EC5ACBD9-1110-4898-83C3-E10317ED9F15			9		No	YES	Core needle biopsy	Bilateral		YES	12						6	0	No	N0	T3a
TCGA-4L-AA1F-01A			64	429.43.0	Nationwide Children's Hospital			TCGA-4L-AA1F	NO	Abnormal (not related to prostate cancer)	M1a	T2c	22		0	4	5		0		350			YES	Extraprostatic Extension Localized (e.g. seminal vesicles)	YES	92B5D7DB-2B0F-452C-ACE5-0C1D7D009D46			8		No	YES	Core needle biopsy	Bilateral		YES	12						4	0	No	N0	T3b
TCGA-H9-7775-01A			68	184.82.0	Nationwide Children's Hospital	TCGA-H9-7775-F37932	A8A094A0-C08C-4AA0-9B61-978A9C1284DA	TCGA-H9-7775	NO				22	6					0		73						0FB506FD-50D8-423E-8FFE-32471C5296F1	Scheduled Follow-up Submission	Complete Remission/Response	7		No	YES	Core needle biopsy	Right	YES	NO	12	12				NO			No		T2c
TCGA-J9-A8CP-01A			66	357.55.0	Nationwide Children's Hospital			TCGA-J9-A8CP	NO		M0	T2a	22						0		298			NO		NO	27EF4263-E769-4255-965B-10B4D30B06D4			7		No	YES	Core needle biopsy	Bilateral		NO	12								No		T3a
TCGA-EJ-5532-01A			57	91.78.0	Nationwide Children's Hospital	TCGA-EJ-5532-F48003	62869B99-06DC-4104-B67D-68276216F0BB	TCGA-EJ-5532	NO		M0	T1c	22	3					0		926			NO		NO	90259445-1E87-4F18-88F3-4F33CE6D210B	Scheduled Follow-up Submission	Complete Remission/Response	7		No	YES	Core needle biopsy	Bilateral	NO	YES	12	9				NO	8	0	No	N0	T3a
TCGA-HC-7079-01A	NO	YES	51	161.76.0	Nationwide Children's Hospital	TCGA-HC-7079-F64395	25B3AA6F-DF87-4EB8-9789-668D8C9D9500	TCGA-HC-7079			M0	T3a	22	29				380	0	380	126	929		NO		NO	90A26A5E-D068-4490-89AD-6606B249540F	Scheduled Follow-up Submission	Stable Disease	7		No	YES	Core needle biopsy	Bilateral	NO	YES	12	8		Biochemical evidence of disease		YES	4	0	No	N0	T3a
TCGA-J4-8200-01A			47	308.70.0	Nationwide Children's Hospital	TCGA-J4-8200-F38883	0CAE045D-E453-4C49-918B-7AFF8E5C50D5	TCGA-J4-8200	NO	Normal (no evidence of prostate cancer) [cM0]	M0	T2	22	28	41	41			0		196			YES	No Evidence of Extraprostatic Extension	NO	D2336214-E3B5-43B8-BF00-2409E3EFB2CE	Scheduled Follow-up Submission	Complete Remission/Response	7		No	YES	Core needle biopsy	Bilateral	NO	YES	12	12				NO	4	0	No	N0	T2c
TCGA-V1-A9OX-01A			56	429.43.0	Nationwide Children's Hospital	TCGA-V1-A9OX-F69435	83F38A81-9EF3-472A-800C-522092356A7A	TCGA-V1-A9OX	NO		M0		22	9							256			NO		NO	8EECF28E-5B1A-415A-AB3B-F4955F8C54B5	Scheduled Follow-up Submission		8		No	YES	Core needle biopsy	Bilateral	NO	YES	12	1				NO	8	0	No	N0	T2c
TCGA-EJ-A46E-01A			57	268.67.0	Nationwide Children's Hospital	TCGA-EJ-A46E-F64644	ADE74FB1-3C09-4C7E-A129-47466A56174C	TCGA-EJ-A46E	NO	Normal (no evidence of prostate cancer) [cM0]	M0	T1c	22	8					0		503			YES	No Evidence of Extraprostatic Extension		DB459F11-642C-479B-8EAF-06C8FF10B499	Scheduled Follow-up Submission	Complete Remission/Response	8		No	YES	Core needle biopsy	Bilateral	YES	YES	12	9					9	0	No	N0
TCGA-G9-7522-01A			49	221.78.0	Nationwide Children's Hospital	TCGA-G9-7522-F48746	C260D1FE-8DE4-47E5-9402-47E9BAAF283E	TCGA-G9-7522	NO		M0	T1c	22	20					0		452			NO		NO	D8AA3F13-B198-480A-B4A4-D0B27F87AC58	Scheduled Follow-up Submission	Complete Remission/Response	7		No	YES	Core needle biopsy	Bilateral	NO	YES	12	9				NO	9	0	No	N0	T2c
TCGA-CH-5791-01A	NO	NO	72	91.78.0	Nationwide Children's Hospital	TCGA-CH-5791-F28985	da3b6478-31bc-4fc4-8aa3-e5813e700efa	TCGA-CH-5791	NO	Normal (no evidence of prostate cancer) [cM0]	M0		22	15	61				0	396	882			NO		NO	A0068380-2987-4F2F-985D-45BD1E0732C3	Scheduled Follow-up Submission	Partial Remission/Response	7		No	YES	Core needle biopsy	Bilateral		YES	12	2		New Primary Tumor		YES	2	0	Yes	N0	T3a
TCGA-KK-A8IB-01A			65	370.53.0	Nationwide Children's Hospital			TCGA-KK-A8IB			M0	T2a	22						0					NO		NO	4515E4B4-B347-4F39-8AD4-28345CD98EC4			9		No	YES	Core needle biopsy	Bilateral		YES	12						21		Yes, History of Prior Malignancy	N0	T3a
TCGA-KK-A8IB-11A			65	370.53.0	Nationwide Children's Hospital			TCGA-KK-A8IB			M0	T2a	22						0					NO		NO	4515E4B4-B347-4F39-8AD4-28345CD98EC4			9		No	YES	Core needle biopsy	Bilateral		YES	12						21		Yes, History of Prior Malignancy	N0	T3a
TCGA-ZG-A8QZ-01A			65	389.51.0	Nationwide Children's Hospital	TCGA-ZG-A8QZ-F67807	2DA2C6E5-5FFD-4C41-B3F5-B9A8B7DE2AA9	TCGA-ZG-A8QZ	NO	Normal (no evidence of prostate cancer) [cM0]	M0	T2a	22	12	12	42			0		239			YES	No Evidence of Extraprostatic Extension	NO	B69785B3-51B2-43B6-99C6-FA5A0BF18AF3	Scheduled Follow-up Submission	Stable Disease	9		No	YES	Core needle biopsy	Bilateral	NO	YES	12	11				NO	8	1	No	N1	T3b
TCGA-YL-A8SA-01A			69	389.51.0	Nationwide Children's Hospital	TCGA-YL-A8SA-F67565	BA2162CC-7225-4988-8E5E-EF070E55A4D5	TCGA-YL-A8SA	NO		M0	T2b	22	6					0		467			NO		NO	FA65ABAC-D70B-4CDB-AF3A-5345301996F5	Scheduled Follow-up Submission		8		No	YES	Core needle biopsy	Bilateral	YES	YES	12	11					9	0	No	N0	T3b
TCGA-ZG-A9MC-01A			69	429.43.0	Nationwide Children's Hospital	TCGA-ZG-A9MC-F67960	4A29D298-9543-47AB-9652-3BDCA1E640BE	TCGA-ZG-A9MC	NO	Normal (no evidence of prostate cancer) [cM0]	M0	T2a	22	13	3		0		0		427			NO		YES	B124AB8C-4617-4108-BB0F-B673E9F698A7	Scheduled Follow-up Submission	Stable Disease	9		No	YES	Core needle biopsy	Bilateral	NO	YES	12	11				NO	14	2	No	N1	T3b
TCGA-FC-A66V-01A			74	312.65.0	Nationwide Children's Hospital	TCGA-FC-A66V-F52816	84234570-FFB0-470F-AA82-F5BD38453B44	TCGA-FC-A66V	NO	Normal (no evidence of prostate cancer) [cM0]	M0	T3b	22	6	28	27			0		-164			YES	No Evidence of Extraprostatic Extension	NO	DA6AC762-E9A8-4E31-B1AB-72A1CF239C23	Scheduled Follow-up Submission	Complete Remission/Response	7		No	YES	Core needle biopsy	Bilateral	YES	YES	12	12				NO	2	0	No	N0	T3b
TCGA-EJ-7788-01A			53	184.82.0	Nationwide Children's Hospital	TCGA-EJ-7788-F48959	D9CA1F53-218A-4A49-BD68-6C3C7F191453	TCGA-EJ-7788	NO		M0	T3b	22	24					0		52			NO		NO	63E549D5-D56F-437A-8356-F639D6B9FD27	Scheduled Follow-up Submission	Complete Remission/Response	7		No	YES	Core needle biopsy	Bilateral	NO	YES	12	9				NO	6	0	No	N0	T3b
TCGA-HC-7209-01A			60	184.82.0	Nationwide Children's Hospital	TCGA-HC-7209-F66045	A762C491-326C-4A23-84DE-CC77FA2E6128	TCGA-HC-7209				T2b	22	1					0		108						921C61EF-88A7-4EA7-A375-AB6D48A73E64	Scheduled Follow-up Submission	Complete Remission/Response	6		No	YES	Core needle biopsy	Bilateral	YES	YES	12	10				NO	2	0	No	N0	T2c
TCGA-V1-A9Z9-01A			63	429.43.0	Nationwide Children's Hospital	TCGA-V1-A9Z9-F70270	2D467FD2-AE58-4C9B-83EA-7AFA87E86714	TCGA-V1-A9Z9	NO		M0	T1c	22	2			9				291			NO		YES	5806479C-08B4-4B08-8C7A-D8C08EFAE883	Scheduled Follow-up Submission	Complete Remission/Response	9		No	YES	Core needle biopsy	Bilateral	NO	YES	12	2				NO	29	0	No	N0	T2c
TCGA-V1-A9OT-01A	NO	NO	61	429.43.0	Nationwide Children's Hospital	TCGA-V1-A9OT-F69439	80B5BE6B-2615-408E-BAAF-A0490977A60E	TCGA-V1-A9OT	YES		M0	T1c	22	9				292			349			NO		NO	B9F990B3-FF34-41AB-8DD7-6B0655D68059	Scheduled Follow-up Submission	Partial Remission/Response	6		No	YES	Core needle biopsy	Bilateral	NO	NO	12	1		Biochemical evidence of disease		YES			No		T2c
TCGA-ZG-A9L1-01A			66	429.43.0	Nationwide Children's Hospital	TCGA-ZG-A9L1-F67811	78716F81-AAF9-4AF1-B2E2-5C67444BA099	TCGA-ZG-A9L1	NO		M0	T1c	22	12					0		1147						25389710-FAE9-4A15-B1BB-A19BA2AD8CA8	Scheduled Follow-up Submission	Stable Disease	9		No	YES	Core needle biopsy	Bilateral	NO	YES	12	11				NO	7	1	No	N1	T3b
TCGA-EJ-8470-01A			58	244.69.0	Nationwide Children's Hospital	TCGA-EJ-8470-F64637	8677AD77-3ADF-43CC-A5DD-373A00A7EB85	TCGA-EJ-8470			M0	T2c	22	8					0								644D86B5-0E4A-45E7-9160-31E6600B2005	Scheduled Follow-up Submission	Complete Remission/Response	7		No	YES	Core needle biopsy	Bilateral	NO	YES	12	9				NO	21	0	No	N0	T2c
TCGA-EJ-5531-01A			62	91.78.0	Nationwide Children's Hospital	TCGA-EJ-5531-F46781	6D0685CA-8C0C-4A9D-B48F-569B50548D6C	TCGA-EJ-5531	NO		M0	T2b	22	16					0		724			NO		NO	8C470594-9449-4274-95EB-12D147972B40	Scheduled Follow-up Submission	Complete Remission/Response	7		No	YES	Core needle biopsy	Bilateral	NO	YES	12	8				NO	35	0	No	N0	T3a
TCGA-VP-A87H-01A			76	357.55.0	Nationwide Children's Hospital	TCGA-VP-A87H-F64478	20F41DC4-90CF-4A36-8A6E-EBD3692AA0AE	TCGA-VP-A87H	NO		M0	T2	22	3		24			0		663			YES	No Evidence of Extraprostatic Extension	NO	F1AC6249-1DD2-4C17-8E37-00D2DF79F7DE	Scheduled Follow-up Submission	Complete Remission/Response	9		No	YES	Core needle biopsy	Bilateral	YES	YES	12	9				NO	16	0	No	N0	T3b
TCGA-FC-A4JI-01A			70	268.67.0	Nationwide Children's Hospital	TCGA-FC-A4JI-F46430	C0B423C8-6942-4F86-8FB4-1B62A30BD53A	TCGA-FC-A4JI		Normal (no evidence of prostate cancer) [cM0]	M0	T4	22	7	12	16			0					YES	Extraprostatic Extension Localized (e.g. seminal vesicles)	NO	308EEC50-AF2E-4CF9-AAB3-2F808DEE4AB7	Scheduled Follow-up Submission	Complete Remission/Response	8		No	YES	Core needle biopsy	Bilateral	NO	NO	12	8				NO			No		T3a
TCGA-G9-6371-01A			58	108.76.0	Nationwide Children's Hospital	TCGA-G9-6371-F40637	CF2059AB-B6D1-4D73-8D52-A985C0A5E54F	TCGA-G9-6371	NO		M0	T1c	22	26					0		846			NO		NO	DB596318-7F5C-4412-B8D0-1CD11299F5DD	Scheduled Follow-up Submission	Complete Remission/Response	6		No	YES	Core needle biopsy	Bilateral	NO	NO	12	2				NO			No		T2c
TCGA-KK-A6E0-01A			59	315.66.0	Nationwide Children's Hospital	TCGA-KK-A6E0-F70468	AB296FA4-60FE-4C4B-948A-83803523DE0B	TCGA-KK-A6E0	YES	Normal (no evidence of prostate cancer) [cM0]	M0	T2b	22	17	11				0		941			NO		NO	A80AF06A-F0EA-4591-86F7-53852C347003	Scheduled Follow-up Submission	Complete Remission/Response	9		No	YES	Core needle biopsy	Right	NO	YES	12	2				NO	9	0	No	N0	T3a
TCGA-KK-A6E0-11A			59	315.66.0	Nationwide Children's Hospital	TCGA-KK-A6E0-F70468	AB296FA4-60FE-4C4B-948A-83803523DE0B	TCGA-KK-A6E0	YES	Normal (no evidence of prostate cancer) [cM0]	M0	T2b	22	17	11				0		941			NO		NO	A80AF06A-F0EA-4591-86F7-53852C347003	Scheduled Follow-up Submission	Complete Remission/Response	9		No	YES	Core needle biopsy	Right	NO	YES	12	2				NO	9	0	No	N0	T3a
TCGA-VN-A88R-01A	YES	NO	53	370.53.0	Nationwide Children's Hospital	TCGA-VN-A88R-F69083	453259A8-C777-4F65-AA1C-12C2EFC6608E	TCGA-VN-A88R	NO	Abnormal (not related to prostate cancer)	M0	T1c	22	29	316	316	207	512	0	512	459			YES	Equivocal	YES	5E6DF9F1-1620-47B1-BDAF-080C20CF8AAC	Scheduled Follow-up Submission		8		No	YES	Core needle biopsy	Bilateral	NO	YES	12	12		Biochemical evidence of disease		YES	34	0	No	N0	T2c
TCGA-V1-A9OQ-01A			67	429.43.0	Nationwide Children's Hospital	TCGA-V1-A9OQ-F69411	826189F5-1F22-4DB8-8C4A-302CE25D20FE	TCGA-V1-A9OQ	NO		M0	T1c	22	9							371			NO		NO	8BC50682-3591-4CC8-BD92-893D8AFFA2AF	Scheduled Follow-up Submission	Complete Remission/Response	6		No	YES	Core needle biopsy	Bilateral	NO	NO	12	1				NO	0		No		T3a
TCGA-M7-A71Z-01A			62	331.61.0	Nationwide Children's Hospital	TCGA-M7-A71Z-F68775	5F779B1D-AA4B-41BA-8F8D-6A3176622739	TCGA-M7-A71Z	NO			T2a	22	15					0		209			NO		NO	7A8A3101-4221-4FDA-9FBD-F9508C17FEC6	Scheduled Follow-up Submission	Complete Remission/Response	7		No	YES	Core needle biopsy	Right	NO	YES	12	12				NO	9	0	No	N0	T3a
TCGA-HI-7170-01A			58	184.82.0	Nationwide Children's Hospital	TCGA-HI-7170-F29013	976b4df7-b4f4-41f5-a440-9968f362dcb1	TCGA-HI-7170	NO	Normal (no evidence of prostate cancer) [cM0]	M0	T1c	22	21	-96	-92	-78		0		1746			YES	No Evidence of Extraprostatic Extension	YES	544E6B8C-C364-4A0B-A960-9D5B1DEEAF71	Scheduled Follow-up Submission	Complete Remission/Response	6		No	YES	Transurethral resection (TURBT)	Bilateral		YES	12	2				NO	6	0	No	N0	T2c
TCGA-V1-A8WS-01A	NO	YES	56	389.51.0	Nationwide Children's Hospital	TCGA-V1-A8WS-F69434	49DD062F-DAB6-49A2-94BA-855083AF6886	TCGA-V1-A8WS	NO		M0	T1c	22	9							474			NO		NO	C9DACFF6-0FC4-43BE-97F8-427DBB908880	Scheduled Follow-up Submission	Partial Remission/Response	6		No	YES	Core needle biopsy	Bilateral	NO	NO	12	1		Biochemical evidence of disease		YES			No		T3b
TCGA-SU-A7E7-01A	NO	NO	60	348.57.0	Nationwide Children's Hospital	TCGA-SU-A7E7-F64938	3FADB74C-BD79-4E49-8753-AD8EF5B30380	TCGA-SU-A7E7	NO	Normal (no evidence of prostate cancer) [cM0]	M0	T2b	22	16	6	-10			0		426			YES	No Evidence of Extraprostatic Extension	NO	D700DEF5-C976-4372-BD89-ADEF39A71C28	Scheduled Follow-up Submission	Complete Remission/Response	8		No	YES	Core needle biopsy	Right	NO	YES	12	9				NO	9	0	No	N0	T2b
TCGA-CH-5762-01A			60	91.78.0	Nationwide Children's Hospital	TCGA-CH-5762-F28975	bdae05b3-8281-4ba4-8d6d-4616d304fef9	TCGA-CH-5762	NO	Normal (no evidence of prostate cancer) [cM0]	M0		22	14	92	92			0		1313			YES	No Evidence of Extraprostatic Extension	NO	5D306570-B39B-43A0-985D-DBE73B9EC095	Scheduled Follow-up Submission	Complete Remission/Response	7		No	YES	Core needle biopsy	Bilateral		YES	12	2				NO	7	0	No	N0	T3b
TCGA-CH-5762-11A			60	91.78.0	Nationwide Children's Hospital	TCGA-CH-5762-F28975	bdae05b3-8281-4ba4-8d6d-4616d304fef9	TCGA-CH-5762	NO	Normal (no evidence of prostate cancer) [cM0]	M0		22	14	92	92			0		1313			YES	No Evidence of Extraprostatic Extension	NO	5D306570-B39B-43A0-985D-DBE73B9EC095	Scheduled Follow-up Submission	Complete Remission/Response	7		No	YES	Core needle biopsy	Bilateral		YES	12	2				NO	7	0	No	N0	T3b
TCGA-KC-A4BN-01A			55	268.67.0	Nationwide Children's Hospital			TCGA-KC-A4BN	NO		M0	T1c	22				44		0		529			NO		YES	59190598-A24A-495D-A3B5-FC0D77C3317C			7		No	YES	Core needle biopsy	Right		YES	12						6	0	No	N0	T2a
TCGA-FC-7708-01A			52	184.82.0	Nationwide Children's Hospital	TCGA-FC-7708-F55508	CEA16217-AC40-4CF6-B2CD-D3801AF27578	TCGA-FC-7708	NO		M0	T1c	22	8					0					NO		NO	06AACC4D-16EC-4204-8B91-6A1B4D767A3C	Scheduled Follow-up Submission	Complete Remission/Response	7		No	YES	Core needle biopsy	Bilateral	YES	YES	12	1				NO	4	0	No	N0	T3a
TCGA-EJ-5508-01A			65	91.78.0	Nationwide Children's Hospital	TCGA-EJ-5508-F46209	FE909C1B-A3A6-40AD-929B-3266091DEACD	TCGA-EJ-5508	NO		M0	T1c	22	3					0		907			NO		NO	6F6B8E92-2C69-4623-8E99-C35B2CE0FF33	Scheduled Follow-up Submission	Complete Remission/Response	7		No	YES	Core needle biopsy	Bilateral	NO	YES	12	8				NO	17	0	No	N0	T3a
TCGA-XJ-A9DI-01A			62	389.51.0	Nationwide Children's Hospital	TCGA-XJ-A9DI-F66555	619D97F8-FD21-467B-A5A3-8B843D024982	TCGA-XJ-A9DI	NO	Normal (no evidence of prostate cancer) [cM0]	M0	T2b	22	20	-61				0		1461			NO		NO	7733095A-EE52-486C-A4A8-F70A1F8BA513	Scheduled Follow-up Submission	Complete Remission/Response	9		No	YES	Core needle biopsy		NO	YES	12	10				NO	5	0	No	N0	T3b
TCGA-XJ-A83G-01A			51	357.55.0	Nationwide Children's Hospital	TCGA-XJ-A83G-F56698	F386BA05-E8B3-4E8D-8846-911D7855B126	TCGA-XJ-A83G	NO			T1c	22	3					0		1126			NO			D5FC2BCC-484D-428C-8629-BDBDC8C79D23	Scheduled Follow-up Submission	Complete Remission/Response	7		No	YES	Core needle biopsy	Bilateral	NO	YES	12	10				NO	4	0	No	N0	T3b
TCGA-J4-A6M7-01A			53	320.62.0	Nationwide Children's Hospital	TCGA-J4-A6M7-F63950	CA926FAD-3018-4790-B3E8-7BB5D5DBB79C	TCGA-J4-A6M7	NO		M0	T2	22	21					0		279						481BB37A-5864-44EB-AF9A-20AC1398A97F	Scheduled Follow-up Submission	Complete Remission/Response	7		No	YES	Core needle biopsy	Bilateral	NO	NO	12	8				NO			No		T2c
TCGA-J4-A83K-01A			52	357.55.0	Nationwide Children's Hospital	TCGA-J4-A83K-F63953	7D21D840-7BBE-4E42-BF7C-4A84C2612DEA	TCGA-J4-A83K	NO		M0	T1c	22	21					0		205						26656B71-FDF3-4D83-BC7F-ACA81B353BDC	Scheduled Follow-up Submission	Complete Remission/Response	6		No	YES	Core needle biopsy	Bilateral	NO	NO	12	8				NO			No		T2c
TCGA-EJ-A7NM-01A			64	348.57.0	Nationwide Children's Hospital	TCGA-EJ-A7NM-F64762	7CBA6408-5288-4E86-8E2C-3729038D7CA0	TCGA-EJ-A7NM	NO		M0	T3b	22	10					0		128						D0DBE117-4F61-4600-B2EF-EE0D86E79CDA	Scheduled Follow-up Submission	Complete Remission/Response	9	mixed acinar & ductal	No	YES	Core needle biopsy	Bilateral	NO	YES	12	9				NO	29	3	No	N1	T3b
TCGA-HC-7749-01A			70	184.82.0	Nationwide Children's Hospital	TCGA-HC-7749-F48773	9B526C51-DE61-4B91-90C7-C1197D5AD8BC	TCGA-HC-7749			M0		22	20					0		102						38B37207-BCA1-4A85-9F34-04B4CCDCFE82	Scheduled Follow-up Submission	Complete Remission/Response	7		No	YES	Core needle biopsy	Right	NO	YES	12	9				NO	10	0	No	N0	T3a
TCGA-CH-5737-01A			73	91.78.0	Nationwide Children's Hospital			TCGA-CH-5737	NO	Normal (no evidence of prostate cancer) [cM0]	M0		22		91	91	91		0					YES	No Evidence of Extraprostatic Extension	YES	0FE3727F-29E5-4498-B028-DF7525AB8259			7		No	YES	Core needle biopsy	Bilateral		YES	12						8	0	No	N0	T2c
TCGA-2A-AAYU-01A			56	429.43.0	Nationwide Children's Hospital	TCGA-2A-AAYU-F71848	7A3178ED-1B80-4624-AD64-F48A46BC6C4B	TCGA-2A-AAYU	NO		M0	T1c	22	31			52		0		269			NO		YES	6509FB0F-B2DD-414A-A3AB-1E448422D27B	Scheduled Follow-up Submission		6		No	YES	Core needle biopsy	Left	NO	YES	12	3				NO	28	0	No	N0	T3a
TCGA-YL-A8SJ-01B	NO	YES	60	389.51.0	Nationwide Children's Hospital	TCGA-YL-A8SJ-F58899	87D7CD4E-A4F6-4491-AEE8-9B60799912DA	TCGA-YL-A8SJ	YES		M0		22	25				752	0	752	1426			NO		NO	A87CB357-C904-4220-BE4D-60859A0AEBAC	Additional New Tumor Event	Partial Remission/Response	9		No	YES	Core needle biopsy	Bilateral	NO	YES	12	4		Biochemical evidence of disease		YES	29	0	No	N0	T3b
TCGA-V1-A8WW-01A	NO	YES	59	389.51.0	Nationwide Children's Hospital	TCGA-V1-A8WW-F69466	4F8E6A69-286F-45C6-AF17-7F614744A4E1	TCGA-V1-A8WW	NO		M0	T2b	22	9			709	58			695			NO		YES	FB167781-F0EB-4E77-840D-27CF179A4C1E	Scheduled Follow-up Submission	Partial Remission/Response	9		No	YES	Core needle biopsy	Bilateral	NO	YES	12	1		Biochemical evidence of disease		YES	20	1	No	N1	T3b
TCGA-HC-7752-01A			61	184.82.0	Nationwide Children's Hospital	TCGA-HC-7752-F64386	DCF87BE1-900F-4E0E-8CB9-E4A8C7A97D5A	TCGA-HC-7752			M0		22	29					0		138						E0B3CC8F-AF78-40AB-A9DB-905EB22411AB	Scheduled Follow-up Submission	Complete Remission/Response	7		No	YES	Core needle biopsy	Bilateral	NO	YES	12	8				NO	6	0	No	N0	T2c
TCGA-HC-7752-11A			61	184.82.0	Nationwide Children's Hospital	TCGA-HC-7752-F64386	DCF87BE1-900F-4E0E-8CB9-E4A8C7A97D5A	TCGA-HC-7752			M0		22	29					0		138						E0B3CC8F-AF78-40AB-A9DB-905EB22411AB	Scheduled Follow-up Submission	Complete Remission/Response	7		No	YES	Core needle biopsy	Bilateral	NO	YES	12	8				NO	6	0	No	N0	T2c
TCGA-EJ-A65D-01A			66	312.65.0	Nationwide Children's Hospital	TCGA-EJ-A65D-F64716	61E67267-CD62-4B17-9AC1-02890A0415AE	TCGA-EJ-A65D	NO		M0	T3a	22	10					0		393						7F624C97-A886-46E2-9EDE-8ADD7CB471D9	Scheduled Follow-up Submission	Complete Remission/Response	8	ductal	No	YES	Core needle biopsy	Bilateral	NO	YES	12	9				NO	34	0	No	N0	T3a
TCGA-HC-7738-01A	NO	NO	58	184.82.0	Nationwide Children's Hospital	TCGA-HC-7738-F63151	B4101408-E2A8-41EA-887B-267069E327FA	TCGA-HC-7738			M0		22	31				420	0	420							51C8B76B-37ED-4F0C-871B-442CE5ACA7DA	Scheduled Follow-up Submission	Stable Disease	7		No	YES	Core needle biopsy	Bilateral	NO	NO	12	7	Other, specify	Biochemical evidence of disease	biochemical recurrence only	YES			No		T2c
TCGA-HC-7738-11A	NO	NO	58	184.82.0	Nationwide Children's Hospital	TCGA-HC-7738-F63151	B4101408-E2A8-41EA-887B-267069E327FA	TCGA-HC-7738			M0		22	31				420	0	420							51C8B76B-37ED-4F0C-871B-442CE5ACA7DA	Scheduled Follow-up Submission	Stable Disease	7		No	YES	Core needle biopsy	Bilateral	NO	NO	12	7	Other, specify	Biochemical evidence of disease	biochemical recurrence only	YES			No		T2c
TCGA-G9-A9S7-01A			55	429.43.0	Nationwide Children's Hospital	TCGA-G9-A9S7-F66989	F1B10505-340C-4222-A59D-398730C82058	TCGA-G9-A9S7	NO	Abnormal (not related to prostate cancer)	M0	T2a	22	29	32	32			0		643			YES	No Evidence of Extraprostatic Extension	NO	9D4CF88B-5305-4DED-8780-D775F341F4B4	Scheduled Follow-up Submission	Partial Remission/Response	8		No	YES	Core needle biopsy	Bilateral	NO	YES	12	10				NO	8	0	No	N0	T3a
TCGA-HC-7747-01A			52	184.82.0	Nationwide Children's Hospital	TCGA-HC-7747-F60208	053BB5A0-578F-42D3-87FE-9AB36D9D8826	TCGA-HC-7747	NO	Normal (no evidence of prostate cancer) [cM0]	M0	T2b	22	31	25	25			0		392			YES	No Evidence of Extraprostatic Extension	NO	02529330-6082-4C33-A000-BC698AD26C83	Scheduled Follow-up Submission	Complete Remission/Response	7		No	YES	Core needle biopsy	Bilateral	NO	YES	12	5				NO	4	0	No	N0	T2c
TCGA-HC-7747-11A			52	184.82.0	Nationwide Children's Hospital	TCGA-HC-7747-F60208	053BB5A0-578F-42D3-87FE-9AB36D9D8826	TCGA-HC-7747	NO	Normal (no evidence of prostate cancer) [cM0]	M0	T2b	22	31	25	25			0		392			YES	No Evidence of Extraprostatic Extension	NO	02529330-6082-4C33-A000-BC698AD26C83	Scheduled Follow-up Submission	Complete Remission/Response	7		No	YES	Core needle biopsy	Bilateral	NO	YES	12	5				NO	4	0	No	N0	T2c
TCGA-J4-A83I-01A			63	370.53.0	Nationwide Children's Hospital	TCGA-J4-A83I-F70492	ED491216-FE6D-45E0-8E6A-6530FA48D5F2	TCGA-J4-A83I	NO		M0	T1c	22	25					0		257						4EA1EA9A-9C31-42CB-AF43-E30F5F813D78	Scheduled Follow-up Submission	Complete Remission/Response	7		No	YES	Core needle biopsy	Bilateral	NO	YES	12	2				NO	2	0	No	N0	T3a
TCGA-V1-A8X3-01A			51	389.51.0	Nationwide Children's Hospital	TCGA-V1-A8X3-F69469	22D79A07-550D-4F8E-A0CE-5801D235FF21	TCGA-V1-A8X3	NO		M0	T1c	22	9							202			NO		NO	E130F5EF-5466-4C42-B419-2860140899BE	Scheduled Follow-up Submission		7		No	YES	Core needle biopsy	Bilateral	NO	YES	12	1				NO	18	0	No	N0	T2c
TCGA-EJ-5506-01A			67	91.78.0	Nationwide Children's Hospital	TCGA-EJ-5506-F46207	464D58E9-F998-4142-B43E-DEF506845044	TCGA-EJ-5506	NO		M0	T3b	22	3					0		356			NO		NO	34D053EE-05E8-4A90-BD0F-54DEF598DDD7	Scheduled Follow-up Submission	Complete Remission/Response	8		No	YES	Core needle biopsy	Bilateral	NO	YES	12	8				NO	7	1	No	N1	T3b
TCGA-EJ-5496-01A			59	91.78.0	Nationwide Children's Hospital	TCGA-EJ-5496-F46198	C458C599-0391-4932-85C6-D1709F8306A6	TCGA-EJ-5496	NO	Normal (no evidence of prostate cancer) [cM0]	M0	T1c	22	3	15	15			0		595			YES	No Evidence of Extraprostatic Extension	NO	AC08AF68-E22C-4DE9-8DAA-A717D1DE4DD4	Scheduled Follow-up Submission	Complete Remission/Response	7		No	YES	Core needle biopsy	Bilateral	NO	YES	12	8				NO	26	0	No	N0	T2c
TCGA-ZG-A9LU-01A			67	429.43.0	Nationwide Children's Hospital	TCGA-ZG-A9LU-F67851	22AB7300-BF65-4341-9308-6DDEE7DAD46A	TCGA-ZG-A9LU	NO	Normal (no evidence of prostate cancer) [cM0]	M0	T2b	22	12	37		40		0		549			NO		YES	FA6D6FBC-90A2-4640-A7EE-E9ABB01B9C2F	Scheduled Follow-up Submission	Stable Disease	9		No	YES	Core needle biopsy	Bilateral	NO	YES	12	11				NO	7	0	No	N0	T3a
TCGA-TP-A8TV-01A			62	429.43.0	Nationwide Children's Hospital	TCGA-TP-A8TV-F64432	15CB9B07-2890-4421-999B-FCF06B1C6F22	TCGA-TP-A8TV	NO		M0	T1c	22	15					0		249			NO		NO	92671F5F-37D6-41DC-B7C1-FB265ADD5C33	Scheduled Follow-up Submission	Complete Remission/Response	7		No	YES	Core needle biopsy	Bilateral	NO	YES	12	11				NO	4	0	No	N0	T2c
TCGA-2A-AAYO-01A			57	429.43.0	Nationwide Children's Hospital	TCGA-2A-AAYO-F71840	9380832C-00A8-4C1A-A816-28B764D77FA1	TCGA-2A-AAYO	NO		M0	T1c	22	31			180		0		922			NO		YES	0581FFE4-B58F-4219-82A0-7A34D573E254	Scheduled Follow-up Submission	Complete Remission/Response	6		No	YES	Core needle biopsy	Bilateral	NO	NO	12	3				NO			No		T2c
TCGA-YL-A8S8-01A	NO	YES	68	389.51.0	Nationwide Children's Hospital	TCGA-YL-A8S8-F58862	2EF51FDC-EBDA-459B-9EAF-F43B0C25F6BE	TCGA-YL-A8S8	YES	Normal (no evidence of prostate cancer) [cM0]	M0		22	25	18	28		679	0	679	1890			YES	No Evidence of Extraprostatic Extension	NO	3E22977D-7DBA-4E18-B509-B9ADBC5B3F83	Additional New Tumor Event	Progressive Disease	9		No	YES	Core needle biopsy	Bilateral	NO	YES	12	4		Biochemical evidence of disease		YES	10	0	No	N0	T3a
TCGA-YL-A9WL-01A			59	429.43.0	Nationwide Children's Hospital	TCGA-YL-A9WL-F58511	F823EC71-2A60-4B9E-A3BF-B0B36C76BDD7	TCGA-YL-A9WL	YES	Normal (no evidence of prostate cancer) [cM0]	M0	T2a	22	12	28	39		740	0	740	740			YES	No Evidence of Extraprostatic Extension	NO	4D6C1CA5-A6D7-47FF-AF72-DFBFEE962FD9	Additional New Tumor Event		9		No	YES	Core needle biopsy	Bilateral	NO	YES	12	4		Biochemical evidence of disease		YES	15	0	No	N0	T3a
TCGA-ZG-A9L4-01A			61	429.43.0	Nationwide Children's Hospital	TCGA-ZG-A9L4-F67814	28A92787-7A39-43DE-81B5-A67D7957CC21	TCGA-ZG-A9L4	NO		M0	T1c	22	12					0		1108						F2AFA968-8DD9-4FF1-849F-E261058F5407	Scheduled Follow-up Submission	Stable Disease	9		No	YES	Core needle biopsy	Bilateral	NO	YES	12	11				NO	10	0	No	N0	T3b
TCGA-HC-7080-01A	NO	NO	66	161.76.0	Nationwide Children's Hospital	TCGA-HC-7080-F64334	754102F1-5786-4DBE-A89F-58028AA63930	TCGA-HC-7080	NO	Normal (no evidence of prostate cancer) [cM0]	M0	T2a	22	28	19	19			0	894	104			YES	No Evidence of Extraprostatic Extension	NO	0F67E049-3B61-4662-B6FA-292DE7157916	Scheduled Follow-up Submission	Complete Remission/Response	7		No	YES	Core needle biopsy	Right	NO	YES	12	8		New Primary Tumor		YES	2	0	No	N0	T2a
TCGA-XK-AAJP-01A			66	429.43.0	Nationwide Children's Hospital	TCGA-XK-AAJP-F66882	E3C00309-A731-4A5D-8DB7-654202492921	TCGA-XK-AAJP	NO	Normal (no evidence of prostate cancer) [cM0]	M0	T1c	22	24	18		18		0		889			NO		YES	28837A5A-CE74-4942-A74A-2E07D50FBB0F	Scheduled Follow-up Submission	Complete Remission/Response	7		No	YES	Core needle biopsy	Left	NO	YES	12	10				NO	6	0	No	N0	T3a
TCGA-HC-7233-01A			73	184.82.0	Nationwide Children's Hospital	TCGA-HC-7233-F63155	2569241A-2BD1-4EFA-94E2-949A0633B258	TCGA-HC-7233					22	31					0								0BD64660-8923-4D13-84E3-98AE3877ADFA	Scheduled Follow-up Submission	Complete Remission/Response	7		No	YES	Core needle biopsy	Left	NO	YES	12	7				NO	2	0	Yes	N0	T2a
TCGA-VP-A87K-01A	NO	YES	63	357.55.0	Nationwide Children's Hospital	TCGA-VP-A87K-F64502	85C39D7A-EE83-4D45-8E9E-683E708929AA	TCGA-VP-A87K	YES	Normal (no evidence of prostate cancer) [cM0]	M0	T1c	22	3	13	13		467	0	697	655	533	655	YES	No Evidence of Extraprostatic Extension	NO	BC3C7E7D-111E-4139-8F65-AF36E732D022	Scheduled Follow-up Submission	Complete Remission/Response	8	mixed ductal and acinar type	No	YES	Core needle biopsy	Bilateral	NO	YES	12	9		Biochemical evidence of disease		YES	12	0	No	N0	T3b
TCGA-EJ-7314-01A			62	184.82.0	Nationwide Children's Hospital	TCGA-EJ-7314-F64807	DE3325FA-B83F-4BDA-95BD-CAACCF7BDBFA	TCGA-EJ-7314	NO		M0	T2c	22	11		14			0		295			YES	No Evidence of Extraprostatic Extension	NO	DF1CE509-CCB8-4DC1-95EE-E1075DA1BB19	Scheduled Follow-up Submission	Complete Remission/Response	7		No	YES	Core needle biopsy	Bilateral	NO	YES	12	9				NO	14	0	No	N0	T3b
TCGA-EJ-7314-11A			62	184.82.0	Nationwide Children's Hospital	TCGA-EJ-7314-F64807	DE3325FA-B83F-4BDA-95BD-CAACCF7BDBFA	TCGA-EJ-7314	NO		M0	T2c	22	11		14			0		295			YES	No Evidence of Extraprostatic Extension	NO	DF1CE509-CCB8-4DC1-95EE-E1075DA1BB19	Scheduled Follow-up Submission	Complete Remission/Response	7		No	YES	Core needle biopsy	Bilateral	NO	YES	12	9				NO	14	0	No	N0	T3b
TCGA-J9-A8CK-01A			66	357.55.0	Nationwide Children's Hospital			TCGA-J9-A8CK	NO	Normal (no evidence of prostate cancer) [cM0]	M0	T3a	22		8	8			0		321			YES	No Evidence of Extraprostatic Extension	NO	B3B46C1C-7A5B-439D-974E-90585E96C885			9		No	YES	Core needle biopsy	Bilateral		NO	12								No		T3a
TCGA-J4-A6G3-01A	YES	NO	57	315.66.0	Nationwide Children's Hospital	TCGA-J4-A6G3-F63927	85A1F767-FFFF-419B-902F-8B6D283BB209	TCGA-J4-A6G3	NO	Normal (no evidence of prostate cancer) [cM0]	M0	T2	22	21	17		15	618	0	618	528			NO		YES	40369CAC-9290-4D35-8092-117F961E5D8A	Scheduled Follow-up Submission		8		No	YES	Core needle biopsy	Bilateral	NO	YES	12	8		Biochemical evidence of disease		YES	5	0	No	N0	T3b
TCGA-V1-A9ZK-01A			68	429.43.0	Nationwide Children's Hospital	TCGA-V1-A9ZK-F70261	3942A9F2-41A2-4A37-9BFB-911B983A12F8	TCGA-V1-A9ZK	NO		M0	T2a	22	2							1049			NO		NO	38D2C77D-7197-46F4-94FD-AC1D54020335	Scheduled Follow-up Submission	Complete Remission/Response	8		No	YES	Core needle biopsy	Left	NO	YES	12	2				NO	6	0	No	N0	T3b
TCGA-KK-A5A1-01A			72	308.70.0	Nationwide Children's Hospital	TCGA-KK-A5A1-F70560	505064AD-36A2-4FD9-A68A-7A32D161DBEB	TCGA-KK-A5A1	NO	Normal (no evidence of prostate cancer) [cM0]	M0	T3a	22	25	57	14			0		420			YES		NO	DF3CE149-77C8-4C10-B4CB-1F669B2518C3	Scheduled Follow-up Submission		9		No	YES	Core needle biopsy	Bilateral	NO	YES	12	2					3	0	No	N0	T3b
TCGA-KK-A5A1-11A			72	308.70.0	Nationwide Children's Hospital	TCGA-KK-A5A1-F70560	505064AD-36A2-4FD9-A68A-7A32D161DBEB	TCGA-KK-A5A1	NO	Normal (no evidence of prostate cancer) [cM0]	M0	T3a	22	25	57	14			0		420			YES		NO	DF3CE149-77C8-4C10-B4CB-1F669B2518C3	Scheduled Follow-up Submission		9		No	YES	Core needle biopsy	Bilateral	NO	YES	12	2					3	0	No	N0	T3b
TCGA-ZG-A8QY-01A			67	389.51.0	Nationwide Children's Hospital	TCGA-ZG-A8QY-F67806	69E796AB-CA94-45A6-83DA-D89A09CDE086	TCGA-ZG-A8QY		Normal (no evidence of prostate cancer) [cM0]	M0	T2c	22	12	5		5		0					NO		YES	6A5F93AB-9576-41CF-973B-89596CF2F866	Scheduled Follow-up Submission	Stable Disease	9		No	YES	Core needle biopsy	Bilateral	NO	YES	12	11				NO	14	1	No	N1	T3b
TCGA-EJ-7784-01A			63	184.82.0	Nationwide Children's Hospital	TCGA-EJ-7784-F48949	34F1823A-D686-4415-8678-BA92AA7AA39D	TCGA-EJ-7784	NO	Normal (no evidence of prostate cancer) [cM0]	M0	T2c	22	24	0	0			0		167			YES	No Evidence of Extraprostatic Extension	NO	0B6504EC-AF23-4065-BAF6-B4049A1FA6CC	Scheduled Follow-up Submission	Complete Remission/Response	7		No	YES	Core needle biopsy	Bilateral	NO	YES	12	9				NO	13	0	No	N0	T2c
TCGA-EJ-7784-11A			63	184.82.0	Nationwide Children's Hospital	TCGA-EJ-7784-F48949	34F1823A-D686-4415-8678-BA92AA7AA39D	TCGA-EJ-7784	NO	Normal (no evidence of prostate cancer) [cM0]	M0	T2c	22	24	0	0			0		167			YES	No Evidence of Extraprostatic Extension	NO	0B6504EC-AF23-4065-BAF6-B4049A1FA6CC	Scheduled Follow-up Submission	Complete Remission/Response	7		No	YES	Core needle biopsy	Bilateral	NO	YES	12	9				NO	13	0	No	N0	T2c
TCGA-YL-A8SI-01A	YES	YES	69	429.43.0	Nationwide Children's Hospital	TCGA-YL-A8SI-F67703	56F2535C-42F6-4F39-99F4-6BBCC3AE62CB	TCGA-YL-A8SI	NO	Normal (no evidence of prostate cancer) [cM0]	M0		22	10	47	62		1423	0	1423	1441			YES	No Evidence of Extraprostatic Extension	NO	2188E964-8EF4-4A84-81D0-81ACA2787D7A	Scheduled Follow-up Submission	Complete Remission/Response	9		No	YES	Core needle biopsy	Bilateral	NO	YES	12	11		Biochemical evidence of disease		YES	15	0	No	N0	T3a
TCGA-G9-6377-01A			61	161.76.0	Nationwide Children's Hospital	TCGA-G9-6377-F40633	75F6491C-8AB9-4B76-886F-B26A722F292E	TCGA-G9-6377	NO	Abnormal (not related to prostate cancer)	M0	T2b	22	26	36	11			0		518			YES	No Evidence of Extraprostatic Extension	NO	FB520713-DA8E-409E-8CF6-EEF3096B1861	Scheduled Follow-up Submission	Complete Remission/Response	7		No	YES	Core needle biopsy	Bilateral	NO	YES	12	2				NO	6	0	No	N0	T2c
TCGA-XK-AAJA-01A			62	429.43.0	Nationwide Children's Hospital			TCGA-XK-AAJA	NO	Normal (no evidence of prostate cancer) [cM0]	M0	T2a	22		15				0		712			NO		NO	EE515866-0D52-47AE-9799-D8F84C80BB2B			7		No	YES	Core needle biopsy	Bilateral		YES	12						7	0	No	N0	T3a
TCGA-M7-A722-01A			65	370.53.0	Nationwide Children's Hospital	TCGA-M7-A722-F71084	54C65B2E-E99D-4A55-B081-D49227F5479A	TCGA-M7-A722	YES	Normal (no evidence of prostate cancer) [cM0]	M0	T2a	22	17	3	3			0		559			YES	No Evidence of Extraprostatic Extension	NO	920907FB-A826-4156-B34C-C231849169F5	Scheduled Follow-up Submission	Complete Remission/Response	8		No	YES	Core needle biopsy	Bilateral	NO	YES	12	3				YES	4	0	No	N0	T3a
TCGA-CH-5794-01A			65	91.78.0	Nationwide Children's Hospital	TCGA-CH-5794-F28994	bdba596a-0ffc-4ded-a974-2bf19b86720f	TCGA-CH-5794	NO	Normal (no evidence of prostate cancer) [cM0]	M0		22	15	62	62			0		821			YES	No Evidence of Extraprostatic Extension	NO	A4E4B3C9-1622-49EA-B7E3-4F5AF0B0CC9E	Scheduled Follow-up Submission	Complete Remission/Response	7		No	YES	Core needle biopsy	Bilateral		YES	12	2				NO	4	0	No	N0	T2b
TCGA-EJ-A65F-01A		YES	59	315.66.0	Nationwide Children's Hospital	TCGA-EJ-A65F-F64718	9C6680B2-A416-4582-8541-B85141475004	TCGA-EJ-A65F	YES		M0	T3b	22	10					0		75						2205D7F9-71F2-45A6-ADBE-AAC6C5306E05	Scheduled Follow-up Submission	Complete Remission/Response	9	acinar and cribriform	No	YES	Core needle biopsy	Bilateral	NO	YES	12	9				NO	4	0	No	N0	T3b
TCGA-YL-A8SP-01B			58	389.51.0	Nationwide Children's Hospital	TCGA-YL-A8SP-F59002	26BA4C9F-CA75-4665-8B17-2E8F2383182F	TCGA-YL-A8SP	NO		M0	T2a	22	30				2036	0	2036	2155						C1D38E14-BE34-4365-A3BD-40CC251495D1	Additional New Tumor Event		9		No	YES	Core needle biopsy	Bilateral	NO	NO	12	4		Biochemical evidence of disease		YES			No		T3b
TCGA-J9-A8CM-01A			66	357.55.0	Nationwide Children's Hospital			TCGA-J9-A8CM	YES	Normal (no evidence of prostate cancer) [cM0]	M0	T2c	22		14				0		463			NO		NO	71DDA7E9-7D15-48FD-B5A9-FBE347DF3E2A			9		No	YES	Core needle biopsy	Bilateral		YES	12						14	1	No	N1	T3b
TCGA-KK-A8I5-01A			55	370.53.0	Nationwide Children's Hospital	TCGA-KK-A8I5-F70513	1C8B73D0-04B0-428B-921C-56DF7188A132	TCGA-KK-A8I5	NO		M0	T2a	22	24					0		1979			NO		NO	7BDD2FA0-9A2F-45A2-93CA-3D92F487EF16	Scheduled Follow-up Submission		7		No	YES	Core needle biopsy	Right	NO	YES	12	2					6		No	N0	T2b
TCGA-KK-A8I5-11A			55	370.53.0	Nationwide Children's Hospital	TCGA-KK-A8I5-F70513	1C8B73D0-04B0-428B-921C-56DF7188A132	TCGA-KK-A8I5	NO		M0	T2a	22	24					0		1979			NO		NO	7BDD2FA0-9A2F-45A2-93CA-3D92F487EF16	Scheduled Follow-up Submission		7		No	YES	Core needle biopsy	Right	NO	YES	12	2					6		No	N0	T2b
TCGA-HC-7211-01A			62	184.82.0	Nationwide Children's Hospital	TCGA-HC-7211-F64373	44BA64FC-D279-42D3-99C3-EABFFF03BE55	TCGA-HC-7211		Normal (no evidence of prostate cancer) [cM0]	M0	T2a	22	29	14	14			0		-17			YES	No Evidence of Extraprostatic Extension	NO	436443DB-A36C-4AEF-AA5E-45AD10D6D5A0	Scheduled Follow-up Submission	Complete Remission/Response	7		No	YES	Core needle biopsy	Bilateral	NO	YES	12	8				NO	10	0	No	N0	T2c
TCGA-HC-7211-11A			62	184.82.0	Nationwide Children's Hospital	TCGA-HC-7211-F64373	44BA64FC-D279-42D3-99C3-EABFFF03BE55	TCGA-HC-7211		Normal (no evidence of prostate cancer) [cM0]	M0	T2a	22	29	14	14			0		-17			YES	No Evidence of Extraprostatic Extension	NO	436443DB-A36C-4AEF-AA5E-45AD10D6D5A0	Scheduled Follow-up Submission	Complete Remission/Response	7		No	YES	Core needle biopsy	Bilateral	NO	YES	12	8				NO	10	0	No	N0	T2c
TCGA-HC-7081-01A			62	161.76.0	Nationwide Children's Hospital	TCGA-HC-7081-F64330	51556473-D9CE-4DA4-B45A-53C079F25A2E	TCGA-HC-7081					22	28					0								6250D12F-38E0-4BFA-A1FA-008940709ECB	Scheduled Follow-up Submission	Stable Disease	9		No	YES	Core needle biopsy	Bilateral	NO	NO	12	8				NO			No		T3b
TCGA-J4-8198-01A			49	221.78.0	Nationwide Children's Hospital	TCGA-J4-8198-F55294	FC446624-75E9-4A97-B0DA-57F48A3D5C2D	TCGA-J4-8198	NO		M0	T1c	22	3					0		76						2B32D3AF-F848-4283-BDC5-E945A6944913	Scheduled Follow-up Submission	Complete Remission/Response	7		No	YES	Core needle biopsy	Bilateral	NO	NO	12	1				NO			No		T3b
TCGA-VP-AA1N-01A			70	429.43.0	Nationwide Children's Hospital	TCGA-VP-AA1N-F64506	C3F75889-EBAC-4617-A0CD-516477B80A5F	TCGA-VP-AA1N	NO	Normal (no evidence of prostate cancer) [cM0]	M0	T1c	22	3	17	17			0		542			YES	No Evidence of Extraprostatic Extension	NO	66C09A60-5A15-4810-B14D-FC16AF773C6A	Scheduled Follow-up Submission	Complete Remission/Response	9		No	YES	Core needle biopsy	Bilateral	YES	YES	12	9				NO	5	0	No	N0	T3a
TCGA-KK-A8I7-01A	YES	NO	55	370.53.0	Nationwide Children's Hospital	TCGA-KK-A8I7-F70524	548438ED-B791-4EB1-80D4-346B60F97603	TCGA-KK-A8I7	NO		M0	T2c	22	24		24		1088	0	1756	1877	1756		YES	No Evidence of Extraprostatic Extension	NO	1029F6CA-165A-4E85-8800-EF8179485187	Scheduled Follow-up Submission	Complete Remission/Response	9		No	YES	Core needle biopsy	Bilateral	NO	YES	12	2		Biochemical evidence of disease		YES	9	0	No	N0	T3b
TCGA-KK-A8I7-11A	YES	NO	55	370.53.0	Nationwide Children's Hospital	TCGA-KK-A8I7-F70524	548438ED-B791-4EB1-80D4-346B60F97603	TCGA-KK-A8I7	NO		M0	T2c	22	24		24		1088	0	1756	1877	1756		YES	No Evidence of Extraprostatic Extension	NO	1029F6CA-165A-4E85-8800-EF8179485187	Scheduled Follow-up Submission	Complete Remission/Response	9		No	YES	Core needle biopsy	Bilateral	NO	YES	12	2		Biochemical evidence of disease		YES	9	0	No	N0	T3b
TCGA-HC-A6AP-01A			61	312.65.0	Nationwide Children's Hospital			TCGA-HC-A6AP			M0	T1c	22			15			0					YES	No Evidence of Extraprostatic Extension	NO	AAD0A39E-E1F0-42B9-9EA6-8F503F6955B7			7		No	YES	Core needle biopsy	Bilateral		NO	12								No		T2c
TCGA-KC-A7F5-01A			54	348.57.0	Nationwide Children's Hospital			TCGA-KC-A7F5	NO	Normal (no evidence of prostate cancer) [cM0]	M0	T2c	22		5	5	-56		0		91			YES	No Evidence of Extraprostatic Extension	YES	15853727-E395-47F7-AAF3-F20D8EA6988B			7		No	YES	Core needle biopsy	Right		YES	12						16	0	No	N0	T2c
TCGA-G9-7521-01A			52	221.78.0	Nationwide Children's Hospital	TCGA-G9-7521-F48747	29BE139F-D48A-4F6B-A4BA-0B3589494665	TCGA-G9-7521	NO	Normal (no evidence of prostate cancer) [cM0]	M0	T3a	22	20	13	12	45		0		487			YES	No Evidence of Extraprostatic Extension	YES	8265CA69-BFB6-43C1-B9F5-AEA5DE9C2539	Scheduled Follow-up Submission	Progressive Disease	8		No	YES	Core needle biopsy	Bilateral	NO	YES	12	9				NO	9	1	No	N1	T3a
TCGA-HC-A6AO-01A			52	312.65.0	Nationwide Children's Hospital	TCGA-HC-A6AO-F66036	A95BBCE3-50B8-4F17-995E-44275021197F	TCGA-HC-A6AO			M0	T1c	22	1					0					NO		YES	662EE442-DB85-4268-9923-7C5D0EA65F85	Scheduled Follow-up Submission	Complete Remission/Response	7		No	YES	Core needle biopsy	Bilateral	NO	NO	12	10				NO			No		T2c
TCGA-HI-7168-01A	YES	YES	62	184.82.0	Nationwide Children's Hospital	TCGA-HI-7168-F29017	15b16fd2-5ddc-4d24-9ee7-4d0521b12aa1	TCGA-HI-7168	YES	Normal (no evidence of prostate cancer) [cM0]	M0	T1c	22	20	19		19	308	0		2289	1523		NO		YES	2A86ED4A-3E3B-4288-A1B9-DC4DB202BF10	Additional New Tumor Event	Stable Disease	9		No	YES	Core needle biopsy	Bilateral		YES	12	2		Biochemical evidence of disease		YES	9	0	No	N0	T3b
TCGA-EJ-7785-01A			54	184.82.0	Nationwide Children's Hospital	TCGA-EJ-7785-F48956	F18C80FF-72D6-477E-B3B2-F4662537BE07	TCGA-EJ-7785	NO		M0	T2b	22	24					0		259			NO		NO	5A01499F-805A-4C21-B67D-3532172E9244	Scheduled Follow-up Submission	Complete Remission/Response	7		No	YES	Core needle biopsy	Bilateral	NO	YES	12	9				NO	7	0	No	N0	T3a
TCGA-EJ-7785-11A			54	184.82.0	Nationwide Children's Hospital	TCGA-EJ-7785-F48956	F18C80FF-72D6-477E-B3B2-F4662537BE07	TCGA-EJ-7785	NO		M0	T2b	22	24					0		259			NO		NO	5A01499F-805A-4C21-B67D-3532172E9244	Scheduled Follow-up Submission	Complete Remission/Response	7		No	YES	Core needle biopsy	Bilateral	NO	YES	12	9				NO	7	0	No	N0	T3a
TCGA-EJ-5526-01A	NO	NO	56	91.78.0	Nationwide Children's Hospital	TCGA-EJ-5526-F46763	DA3A5241-EE64-4854-B101-1AF198568EC2	TCGA-EJ-5526	NO	Normal (no evidence of prostate cancer) [cM0]	M0	T1c	22	16	19	19		537	0	537	175			YES	No Evidence of Extraprostatic Extension	NO	BC062BD3-7052-42B0-B559-9C6A9BCF4204	Scheduled Follow-up Submission	Progressive Disease	8		No	YES	Core needle biopsy	Bilateral	NO	YES	12	8		Locoregional Recurrence		YES	27	1	No	N1	T3a
TCGA-QU-A6IM-01A			59	320.62.0	Nationwide Children's Hospital	TCGA-QU-A6IM-F66983	E896F6F0-F585-47AA-BBC3-5C5A0E8BFE51	TCGA-QU-A6IM	NO	Equivocal	M0	T2b	22	31	35	50	35		0		896			YES	Equivocal	YES	B65CBD0F-887D-45F6-B5C7-AEC403AFD61F	Scheduled Follow-up Submission	Complete Remission/Response	7		No	YES	Core needle biopsy	Left	YES	YES	12	10				NO	2	0	Yes, History of Prior Malignancy	N0	T2a
TCGA-2A-A8VT-01A			47	389.51.0	Nationwide Children's Hospital	TCGA-2A-A8VT-F71798	2194A7E8-9DD7-4E55-9EF6-BACD266E1E90	TCGA-2A-A8VT	NO	Normal (no evidence of prostate cancer) [cM0]	M0	T2c	22	31	4	-2	4		0		995			YES	No Evidence of Extraprostatic Extension	YES	89B056B9-2922-4AB0-A282-83A2D28DEE09	Scheduled Follow-up Submission	Stable Disease	9		No	YES	Core needle biopsy	Bilateral	NO	YES	12	3				NO	16	2	No	N1	T4
TCGA-G9-6384-01A			53	108.76.0	Nationwide Children's Hospital	TCGA-G9-6384-F40625	61F0D15F-1A4D-4EC0-BF62-3EAAEF55269D	TCGA-G9-6384	NO		M0	T1c	22	26					0		390			NO		NO	E5837C94-ADB6-4714-B9C2-396C869493E3	Scheduled Follow-up Submission	Complete Remission/Response	7		No	YES	Core needle biopsy	Bilateral	NO	YES	12	2				NO	14	0	No	N0	T3a
TCGA-G9-6384-11A			53	108.76.0	Nationwide Children's Hospital	TCGA-G9-6384-F40625	61F0D15F-1A4D-4EC0-BF62-3EAAEF55269D	TCGA-G9-6384	NO		M0	T1c	22	26					0		390			NO		NO	E5837C94-ADB6-4714-B9C2-396C869493E3	Scheduled Follow-up Submission	Complete Remission/Response	7		No	YES	Core needle biopsy	Bilateral	NO	YES	12	2				NO	14	0	No	N0	T3a
TCGA-V1-A9O7-01A	YES	NO	60	429.43.0	Nationwide Children's Hospital	TCGA-V1-A9O7-F69451	63A1E215-0212-48BB-91EC-8A0C5E9A4B23	TCGA-V1-A9O7	YES		M0	T2b	22	9			45	819			2425			NO		YES	AA4353F8-05F1-49A4-A401-61472ED244FF	Scheduled Follow-up Submission	Partial Remission/Response	9		No	YES	Core needle biopsy	Bilateral	NO	YES	12	1		Biochemical evidence of disease		YES	15	0	No	N0	T3a
TCGA-G9-6379-01A			68	320.62.0	Nationwide Children's Hospital	TCGA-G9-6379-F65354	306A10AA-613F-426D-B11B-A6294B914A08	TCGA-G9-6379	NO		M0	T1b	22	22					0		1393			NO		NO	212B1477-EA6D-4568-B09F-9C91D6853C3E	Scheduled Follow-up Submission	Complete Remission/Response	7		No	YES	Core needle biopsy	Bilateral	NO	YES	12	9				NO	6	0	No	N0	T3b
[truncated: 77 more columns]
